# Supplementary material
Source: publisher site journal article supplement (https://www.dovepress.com/article/580289)
Supplement: Supplementary file 1 [file 580289%20Revised%20Supplementary%20Material.docx]

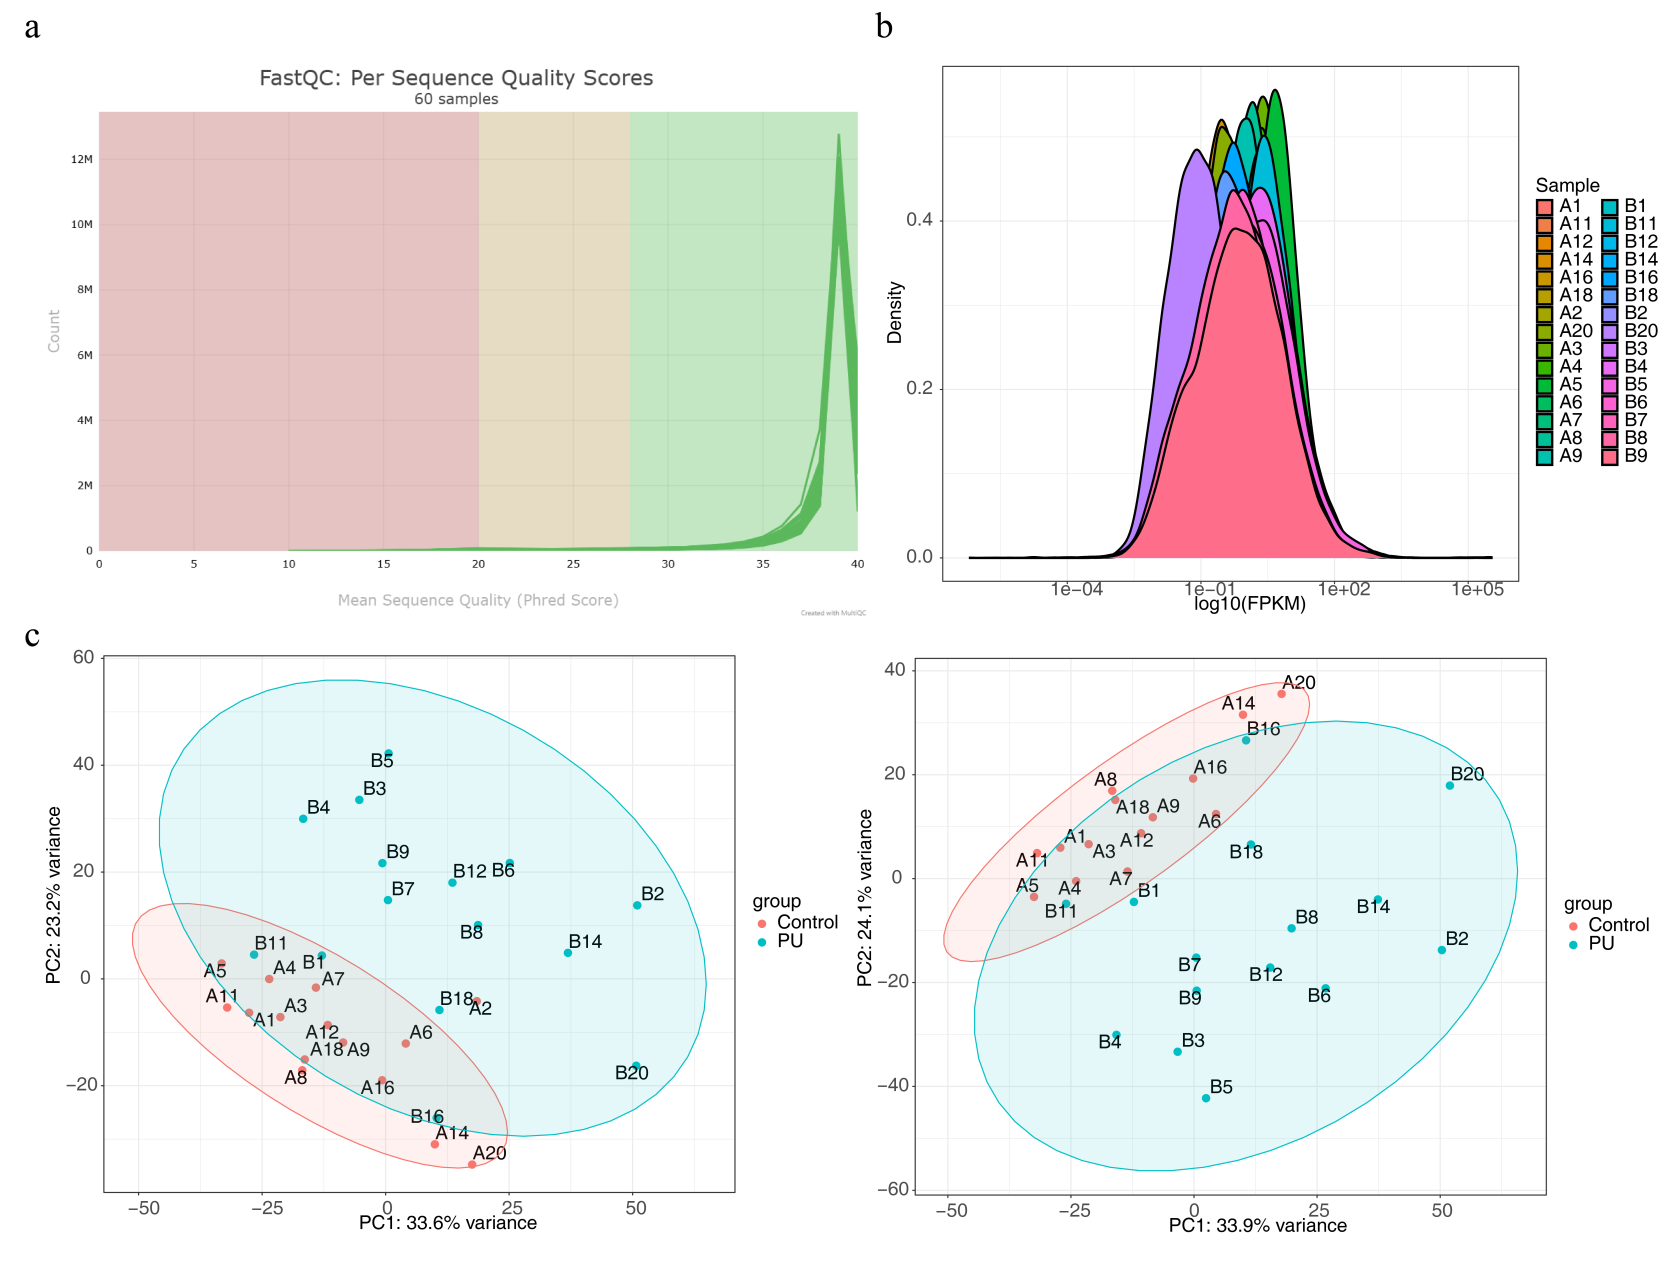


Figure S1: Quality assessment of transcriptome sequencing data. **(a)** FastQC quality control analysis. **(b)** FPKM density distribution. **(c)** Principal component analysis.

Table S1: List of 411 centrosome amplification-related genes (CARGs) obtained from GO and KEGG databases.

| MNS1 | BRCA1 | PIWIL3 | RNF212 | SYCP2L | SGO2 | HUS1B | RSPH1 | KIF18A | PRDM9 |
| --- | --- | --- | --- | --- | --- | --- | --- | --- | --- |
| NDC1 | BRCA2 | OOEP | FBXO43 | MAPK15 | MCMDC2 | ASZ1 | TDRD12 | SLC25A31 | FANCM |
| CHFR | CCNF | WEE2 | C14orf39 | SPDYA | SHOC1 | TAF1L | SYCE1 | NUF2 | CCNB1IP1 |
| FOXJ2 | CDK2 | RAD21L1 | NANOS2 | CDC26 | EXD1 | RPL10L | TUBGCP5 | BRIP1 | DMRTC2 |
| TEX15 | CETN1 | BTBD18 | IHO1 | MEIOB | HFM1 | STK35 | KLHDC3 | MND1 | FIGNL1 |
| TEX14 | CETN2 | SYCE3 | STRA8 | ANKRD31 | WBP2NL | PSMA8 | SLC26A8 | HORMAD1 | ANAPC1 |
| TEX12 | KAT2A | MEIKIN | TUBB8 | SYCE2 | FAM9A | PIWIL4 | ANAPC16 | SLX4 | YTHDC2 |
| TEX11 | TRIM37 | SYCE1L | USP17L2 | ASPM | FAM9B | TERB2 | TDRD9 | SPIRE2 | BOLL |
| TDRD1 | NUBP1 | RNF212B | CENPS | MAJIN | FAM9C | EME1 | CNTD1 | SPATA22 | BRME1 |
| METTL3 | NPM1 | MEI4 | MEIOSIN | REC114 | AGO4 | KASH5 | ANKLE1 | MASTL | C11orf80 |
| CYP26B1 | CHMP1A | DUSP13 | C1orf146 | TERB1 | EME2 | PDIK1L | M1AP | MAEL | RMI1 |
| FMN2 | PKD2 | FZR1 | TRIM75 | MEIOC | PLD6 | HORMAD2 | H1-8 | TUBGCP6 | MUS81 |
| SPIRE1 | PKHD1 | ANAPC5 | TEX19 | PRR19 | CENPX | MEI1 | ZFP42 | CCNB3 | SHCBP1L |
| PTTG3P | STIL | ANAPC7 | SIRT2 | P3H4 | C2CD3 | MDM1 | SPICE1 | CDK1 | ODF2 |
| FBXO5 | XPO1 | YTHDF2 | PLCB1 | RAD51AP1 | CHORDC1 | CHMP1B | CEP120 | CETN3 | PCM1 |
| MLH3 | XRCC3 | ANAPC11 | UBR2 | STAG3 | CHMP2A | CEP76 | DEUP1 | CHD3 | PLK1 |
| SMC1B | ALMS1 | SIRT7 | NCAPD3 | STAG2 | SAC3D1 | CEP63 | SASS6 | CHEK1 | RANBP1 |
| TUBG2 | KAT2B | WNT4 | SUN1 | PTTG2 | CHMP5 | CEP44 | PPP1R35 | CTNNB1 | SLC16A1 |
| TUBGCP4 | ROCK2 | MOV10L1 | NCAPH | TUBGCP2 | CHMP3 | RAB6C | POC1B | DCTN1 | AURKA |
| NCAPH2 | VPS4B | DDX4 | SPO11 | EHMT2 | FBXW5 | BRSK1 | CCDC57 | GADD45A | UVRAG |
| ANAPC2 | ARHGEF10 | NSUN2 | ZNF318 | SPIN1 | NDE1 | CEP295 | WDR62 | FES | XRCC2 |
| PSMC3IP | CEP135 | ZCWPW1 | SUN2 | TDRKH | CEP192 | TMEM67 | CENATAC | GOLGA2 | UXT |
| ANAPC4 | CCP110 | PIWIL2 | RAD54B | HSF2BP | NAT10 | CHMP4C | GEN1 | KIF11 | KIF3B |
| DNMT3L | CKAP5 | SMC2 | ANAPC13 | PRDM7 | CEP72 | CNTROB | CEP295NL | KIF25 | PDE4DIP |
| SLC2A8 | KIAA0753 | SDCCAG8 | CATSPERZ | DMC1 | CDK5RAP2 | C10orf90 | ARL2 | PPP1R12A | CROCC |
| SYCP3 | PDCD6IP | KIF3A | ANAPC15 | FOXJ3 | CENPJ | CHMP4B | BBS4 | NEK2 | PCLAF |
| HAUS7 | NDC80 | CEP250 | PARD6B | CALR | EDNRA | INSR | NPPC | RAD51D | UBE2B |
| NSFL1C | RBM14 | ATF5 | HAUS8 | CCNE1 | ERCC1 | LFNG | NPR2 | RBBP8 | WNT5A |
| CCNL1 | PLK4 | CEP68 | HAUS1 | CDC20 | EREG | LIF | NUMA1 | RPA1 | ZSCAN21 |
| KIAA1614 | PLK2 | HAUS5 | SSX2IP | CDC25A | ERCC4 | MLH1 | OVOL1 | RPS6KA2 | BAG6 |
| MARK4 | CEP131 | PARD6A | UBXN2B | CDC25B | FANCA | MOS | PDE3A | AURKC | SMC1A |
| CEP85 | CEP152 | TUBE1 | SGO1 | CDC25C | FANCD2 | MRE11 | PPP2CA | SYCP1 | RAD54L |
| HAUS3 | USP33 | NIN | HEPACAM2 | CDC27 | GPR3 | MSH4 | PPP2R1A | TERF1 | FKBP6 |
| MCPH1 | SIRT1 | HAUS6 | ATM | CENPC | MSH6 | MSH5 | PSMD13 | TOP2A | CDC23 |
| CCDC102B | NUP62 | CNTLN | ATRX | CKS2 | H2AX | MSX1 | RAD1 | TOP2B | CDC16 |
| MAP9 | RTTN | HAUS4 | BRDT | CORT | HSPA2 | MSX2 | RAD21 | TOP3A | CCNA1 |
| NDEL1 | CHMP2B | HAUS2 | BUB1 | DMRT1 | HUS1 | MYBL1 | RAD51 | TTK | PKMYT1 |
| CCNL2 | CCNE2 | REC8 | BUB1B | DUSP1 | INCENP | MYH9 | RAD51C | TUBG1 | SMC3 |
| PARD6G | EXO1 | BCL2L11 | OSGIN2 | EDN1 | ING2 | NBN | RAD51B | UBB | CCNB2 |
| PTTG1 | ZW10 | SMC4 | TRIP13 | MARF1 | UTP14C | NCAPD2 | ACTR2 | RBM7 | NPM2 |
| PIWIL1 | BUB3 | ACTR3 | TESMIN | ESPL1 | WASHC5 | ANAPC10 | RAD50 | STAG1 | SYCP2 |
| TUBGCP3 |  |  |  |  |  |  |  |  |  |

Table S2: Primer sequences used for RT-qPCR analysis.

| **Primer** | **Sequence** |
| --- | --- |
| GADD45A F | CACTGTCGGGGTGTACGAAG |
| GADD45A R | GTTGATGTCGTTCTCGCAGC |
| DUSP13 F | GGAGATGCAGCTGGTCCTTA |
| DUSP13 R | ATCTTCTGTGTGTCCGCCTG |
| LFNG F | AGCTGGTAATGCTGCACCTC |
| LFNG R | ACAAGCGTCTGGATCTCTGC |
| Internal reference -GAPDH F | ATGGGCAGCCGTTAGGAAAG |
| Internal reference -GAPDH R | AGGAAAAGCATCACCCGGAG |

Table S3:Functional enrichment analysis results of candidate genes, including Gene Ontology (GO) terms and KEGG pathways.

| **ONTOLOGY** | **ID** | **Description** | **GeneRatio** | **BgRatio** | **pvalue** | **p.adjust** | **qvalue** | **geneID** | **Count** |
| --- | --- | --- | --- | --- | --- | --- | --- | --- | --- |
| BP | GO:0007098 | centrosome cycle | 24/48 | 138/18870 | 1.8625966369828736e-39 | 1.93151271255124e-36 | 1.2900932496155061e-36 | CCNF/KAT2A/ALMS1/RTTN/CHMP2B/NAT10/CEP72/CDK5RAP2/TMEM67/CHMP4C/POC1B/WDR62/GEN1/GADD45A/FES/CROCC/KIF3A/CEP250/HAUS5/HAUS4/NDEL1/PARD6B/UBXN2B/HEPACAM2 | 24 |
| BP | GO:0031023 | microtubule organizing center organization | 24/48 | 154/18870 | 3.208302330954104e-38 | 1.6635047585997028e-35 | 1.1110857546146316e-35 | CCNF/KAT2A/ALMS1/RTTN/CHMP2B/NAT10/CEP72/CDK5RAP2/TMEM67/CHMP4C/POC1B/WDR62/GEN1/GADD45A/FES/CROCC/KIF3A/CEP250/HAUS5/HAUS4/NDEL1/PARD6B/UBXN2B/HEPACAM2 | 24 |
| BP | GO:0000280 | nuclear division | 26/48 | 441/18870 | 3.155577972289368e-30 | 1.090778119088025e-27 | 7.285509844794399e-28 | CHMP2B/CDK5RAP2/CHMP4C/GEN1/NDEL1/UBXN2B/CDC25B/DUSP1/EREG/ERCC4/MYBL1/NPR2/RAD51C/UBE2B/RAD54L/RAD50/SYCP2/SMC2/RAD51AP1/EHMT2/FBXO5/NDC1/CCNB1IP1/FIGNL1/TDRD9/AGO4 | 26 |
| BP | GO:0051321 | meiotic cell cycle | 23/48 | 287/18870 | 1.3966244558396517e-29 | 3.620748901764297e-27 | 2.4183655051118174e-27 | CDC25B/DUSP1/EREG/ERCC4/LFNG/MYBL1/NPR2/RAD51C/UBE2B/RAD54L/RAD50/SYCP2/SMC2/RAD51AP1/EHMT2/FBXO5/NDC1/CCNB1IP1/FIGNL1/TUBGCP5/SLC26A8/TDRD9/AGO4 | 23 |
| BP | GO:0048285 | organelle fission | 26/48 | 488/18870 | 4.4784281007641675e-29 | 9.288259880984884e-27 | 6.2038014532691e-27 | CHMP2B/CDK5RAP2/CHMP4C/GEN1/NDEL1/UBXN2B/CDC25B/DUSP1/EREG/ERCC4/MYBL1/NPR2/RAD51C/UBE2B/RAD54L/RAD50/SYCP2/SMC2/RAD51AP1/EHMT2/FBXO5/NDC1/CCNB1IP1/FIGNL1/TDRD9/AGO4 | 26 |
| BP | GO:0140013 | meiotic nuclear division | 19/48 | 194/18870 | 6.131682890838097e-26 | 1.059759192966518e-23 | 7.07832867047626e-24 | CDC25B/EREG/ERCC4/MYBL1/NPR2/RAD51C/UBE2B/RAD54L/RAD50/SYCP2/SMC2/RAD51AP1/EHMT2/FBXO5/NDC1/CCNB1IP1/FIGNL1/TDRD9/AGO4 | 19 |
| BP | GO:1903046 | meiotic cell cycle process | 19/48 | 214/18870 | 4.192744108183548e-25 | 6.211250914551912e-23 | 4.1486099596763516e-23 | CDC25B/EREG/ERCC4/MYBL1/NPR2/RAD51C/UBE2B/RAD54L/RAD50/SYCP2/SMC2/RAD51AP1/EHMT2/FBXO5/NDC1/CCNB1IP1/FIGNL1/TDRD9/AGO4 | 19 |
| BP | GO:0007127 | meiosis I | 15/48 | 129/18870 | 1.3012695480807413e-21 | 1.686770651699661e-19 | 1.1266254771541155e-19 | CDC25B/ERCC4/MYBL1/RAD51C/UBE2B/RAD54L/RAD50/SYCP2/RAD51AP1/EHMT2/FBXO5/NDC1/CCNB1IP1/TDRD9/AGO4 | 15 |
| BP | GO:0061982 | meiosis I cell cycle process | 15/48 | 136/18870 | 2.97323982247516e-21 | 3.4258329954519344e-19 | 2.2881775475890706e-19 | CDC25B/ERCC4/MYBL1/RAD51C/UBE2B/RAD54L/RAD50/SYCP2/RAD51AP1/EHMT2/FBXO5/NDC1/CCNB1IP1/TDRD9/AGO4 | 15 |
| BP | GO:0051298 | centrosome duplication | 13/48 | 75/18870 | 3.567524952429753e-21 | 3.699523375669654e-19 | 2.4709804407355553e-19 | CCNF/KAT2A/ALMS1/RTTN/CHMP2B/NAT10/CEP72/CDK5RAP2/TMEM67/CHMP4C/POC1B/WDR62/GEN1 | 13 |
| BP | GO:0046605 | regulation of centrosome cycle | 10/48 | 54/18870 | 9.174917686819573e-17 | 8.649445128392633e-15 | 5.777125203758161e-15 | CCNF/KAT2A/ALMS1/CHMP2B/NAT10/CDK5RAP2/TMEM67/CHMP4C/WDR62/GEN1 | 10 |
| BP | GO:0007059 | chromosome segregation | 17/48 | 424/18870 | 1.547512903622746e-16 | 1.337309067547323e-14 | 8.932135882313743e-15 | CHMP2B/CDK5RAP2/CHMP4C/GEN1/HAUS5/HAUS4/NDEL1/DUSP1/UBE2B/SYCP2/SMC2/EHMT2/FBXO5/NDC1/CCNB1IP1/TUBGCP5/AGO4 | 17 |
| BP | GO:0010824 | regulation of centrosome duplication | 9/48 | 47/18870 | 2.5517133249547123e-15 | 2.035482090752336e-13 | 1.359536330218786e-13 | CCNF/KAT2A/ALMS1/CHMP2B/NAT10/CDK5RAP2/TMEM67/CHMP4C/GEN1 | 9 |
| BP | GO:0032886 | regulation of microtubule-based process | 13/48 | 258/18870 | 5.436098520911303e-14 | 4.0265958329893e-12 | 2.6894382156087496e-12 | CCNF/KAT2A/ALMS1/CHMP2B/NAT10/CDK5RAP2/TMEM67/CHMP4C/WDR62/GEN1/FES/HAUS5/HAUS4 | 13 |
| BP | GO:0098813 | nuclear chromosome segregation | 13/48 | 312/18870 | 6.176713045410202e-13 | 4.27016761872692e-11 | 2.852124339564851e-11 | CHMP2B/CDK5RAP2/CHMP4C/GEN1/DUSP1/UBE2B/SYCP2/SMC2/EHMT2/FBXO5/NDC1/CCNB1IP1/AGO4 | 13 |
| BP | GO:0070192 | chromosome organization involved in meiotic cell cycle | 8/48 | 65/18870 | 4.295958911839308e-12 | 2.784318369735851e-10 | 1.8596980026251737e-10 | UBE2B/RAD50/SYCP2/SMC2/EHMT2/NDC1/CCNB1IP1/AGO4 | 8 |
| BP | GO:0007099 | centriole replication | 7/48 | 43/18870 | 1.3121059067056364e-11 | 8.003846030904382e-10 | 5.345917564162902e-10 | KAT2A/ALMS1/RTTN/CEP72/CDK5RAP2/POC1B/WDR62 | 7 |
| BP | GO:0140694 | non-membrane-bounded organelle assembly | 13/48 | 408/18870 | 1.8136803452976958e-11 | 1.0448813989298393e-9 | 6.978957118163063e-10 | KAT2A/ALMS1/RTTN/CHMP2B/CEP72/CDK5RAP2/CHMP4C/POC1B/WDR62/HAUS5/HAUS4/FBXO5/TUBGCP5 | 13 |
| BP | GO:0098534 | centriole assembly | 7/48 | 48/18870 | 2.969619627315463e-11 | 1.6207871334348081e-9 | 1.0825538586003184e-9 | KAT2A/ALMS1/RTTN/CEP72/CDK5RAP2/POC1B/WDR62 | 7 |
| BP | GO:0045132 | meiotic chromosome segregation | 8/48 | 91/18870 | 6.886608906954603e-11 | 3.5707067182559615e-9 | 2.3849414004084885e-9 | UBE2B/SYCP2/SMC2/EHMT2/FBXO5/NDC1/CCNB1IP1/AGO4 | 8 |
| BP | GO:0022412 | cellular process involved in reproduction in multicellular organism | 13/48 | 471/18870 | 1.0778438370781014e-10 | 5.3224955192856725e-9 | 3.5549937082575975e-9 | CDC25B/EREG/MYBL1/NPR2/RAD51C/UBE2B/SYCP2/EHMT2/FBXO5/CCNB1IP1/FIGNL1/TDRD9/AGO4 | 13 |
| BP | GO:0007131 | reciprocal meiotic recombination | 7/48 | 60/18870 | 1.5224491498183223e-10 | 6.864259862441741e-9 | 4.584766776111927e-9 | ERCC4/RAD51C/UBE2B/RAD54L/RAD50/RAD51AP1/CCNB1IP1 | 7 |
| BP | GO:0140527 | reciprocal homologous recombination | 7/48 | 60/18870 | 1.5224491498183223e-10 | 6.864259862441741e-9 | 4.584766776111927e-9 | ERCC4/RAD51C/UBE2B/RAD54L/RAD50/RAD51AP1/CCNB1IP1 | 7 |
| BP | GO:0051445 | regulation of meiotic cell cycle | 7/48 | 66/18870 | 3.035132801577502e-10 | 1.3114302980149458e-8 | 8.759286769464897e-9 | CDC25B/DUSP1/LFNG/NPR2/UBE2B/RAD51AP1/FBXO5 | 7 |
| BP | GO:0035825 | homologous recombination | 7/48 | 68/18870 | 3.763788301779802e-10 | 1.561219387578262e-8 | 1.0427674537141514e-8 | ERCC4/RAD51C/UBE2B/RAD54L/RAD50/RAD51AP1/CCNB1IP1 | 7 |
| BP | GO:0045787 | positive regulation of cell cycle | 11/48 | 334/18870 | 5.711475099530656e-10 | 2.2779998762358808e-8 | 1.5215184678101907e-8 | GEN1/UBXN2B/CDC25B/EREG/LFNG/NPR2/RAD51C/UBE2B/SMC2/RAD51AP1/FBXO5 | 11 |
| BP | GO:0090068 | positive regulation of cell cycle process | 10/48 | 262/18870 | 9.224978741184853e-10 | 3.54307516837359e-8 | 2.366485774541767e-8 | GEN1/UBXN2B/CDC25B/EREG/NPR2/RAD51C/UBE2B/SMC2/RAD51AP1/FBXO5 | 10 |
| BP | GO:0010639 | negative regulation of organelle organization | 11/48 | 363/18870 | 1.3721281467714402e-9 | 5.0817746007213694e-8 | 3.394211731487246e-8 | CCNF/KAT2A/NAT10/CDK5RAP2/TMEM67/GEN1/DUSP1/ERCC4/RAD50/EHMT2/FBXO5 | 11 |
| BP | GO:0140014 | mitotic nuclear division | 10/48 | 274/18870 | 1.4228816110838145e-9 | 5.088028381703158e-8 | 3.39838874806951e-8 | CHMP2B/CDK5RAP2/CHMP4C/GEN1/NDEL1/UBXN2B/DUSP1/EREG/SMC2/FBXO5 | 10 |
| BP | GO:0051783 | regulation of nuclear division | 8/48 | 146/18870 | 3.0762146594035707e-9 | 1.0633448672671677e-7 | 7.102278055745787e-8 | CDK5RAP2/GEN1/DUSP1/EREG/NPR2/UBE2B/RAD51AP1/FBXO5 | 8 |
| BP | GO:0046785 | microtubule polymerization | 7/48 | 94/18870 | 3.781860879179701e-9 | 1.2255592911591718e-7 | 8.185738350329746e-8 | CDK5RAP2/FES/HAUS5/HAUS4/NDEL1/FBXO5/TUBGCP5 | 7 |
| BP | GO:2001251 | negative regulation of chromosome organization | 7/48 | 94/18870 | 3.781860879179701e-9 | 1.2255592911591718e-7 | 8.185738350329746e-8 | NAT10/CDK5RAP2/GEN1/DUSP1/ERCC4/RAD50/FBXO5 | 7 |
| BP | GO:0007129 | homologous chromosome pairing at meiosis | 6/48 | 53/18870 | 4.110284956986126e-9 | 1.2916259092104888e-7 | 8.627009574790655e-8 | UBE2B/SYCP2/EHMT2/NDC1/CCNB1IP1/AGO4 | 6 |
| BP | GO:0007140 | male meiotic nuclear division | 6/48 | 55/18870 | 5.170486253380682e-9 | 1.576998307281108e-7 | 1.0533064875308014e-7 | MYBL1/RAD51C/SYCP2/FIGNL1/TDRD9/AGO4 | 6 |
| BP | GO:0051446 | positive regulation of meiotic cell cycle | 5/48 | 27/18870 | 6.652790793846187e-9 | 1.9711268723481418e-7 | 1.3165522834137718e-7 | CDC25B/LFNG/NPR2/UBE2B/RAD51AP1 | 5 |
| BP | GO:0045143 | homologous chromosome segregation | 6/48 | 65/18870 | 1.4453184475056234e-8 | 4.1633200835092543e-7 | 2.780758884382164e-7 | UBE2B/SYCP2/EHMT2/NDC1/CCNB1IP1/AGO4 | 6 |
| BP | GO:0010826 | negative regulation of centrosome duplication | 4/48 | 12/18870 | 1.79670771409112e-8 | 4.903120788190767e-7 | 3.2748855287311824e-7 | CCNF/KAT2A/CDK5RAP2/TMEM67 | 4 |
| BP | GO:0046606 | negative regulation of centrosome cycle | 4/48 | 12/18870 | 1.79670771409112e-8 | 4.903120788190767e-7 | 3.2748855287311824e-7 | CCNF/KAT2A/CDK5RAP2/TMEM67 | 4 |
| BP | GO:0007051 | spindle organization | 8/48 | 202/18870 | 3.9240432697252235e-8 | 1.0433930437705273e-6 | 6.969016117352758e-7 | CHMP2B/CEP72/CHMP4C/WDR62/HAUS5/HAUS4/FBXO5/TUBGCP5 | 8 |
| BP | GO:0031109 | microtubule polymerization or depolymerization | 7/48 | 134/18870 | 4.4933241813024254e-8 | 1.1648942940026539e-6 | 7.780545556044725e-7 | CDK5RAP2/FES/HAUS5/HAUS4/NDEL1/FBXO5/TUBGCP5 | 7 |
| BP | GO:2000241 | regulation of reproductive process | 8/48 | 207/18870 | 4.7430796610533776e-8 | 1.1996520996371593e-6 | 8.012699401728169e-7 | CDC25B/DUSP1/LFNG/NPR2/UBE2B/SYCP2/RAD51AP1/FBXO5 | 8 |
| BP | GO:0010457 | centriole-centriole cohesion | 4/48 | 15/18870 | 4.9268852831829747e-8 | 1.2164714377763677e-6 | 8.125038888056132e-7 | RTTN/CROCC/KIF3A/CEP250 | 4 |
| BP | GO:0045786 | negative regulation of cell cycle | 10/48 | 407/18870 | 6.142364029481064e-8 | 1.4813096508306657e-6 | 9.89394254932323e-7 | CCNF/KAT2A/CDK5RAP2/TMEM67/CHMP4C/GEN1/DUSP1/NPR2/RAD50/FBXO5 | 10 |
| BP | GO:0010948 | negative regulation of cell cycle process | 9/48 | 320/18870 | 9.722643072868263e-8 | 2.291450196946452e-6 | 1.530502187068736e-6 | CCNF/KAT2A/CDK5RAP2/TMEM67/CHMP4C/GEN1/DUSP1/RAD50/FBXO5 | 9 |
| BP | GO:0006310 | DNA recombination | 9/48 | 340/18870 | 1.626831061243673e-7 | 3.7489418011326417e-6 | 2.5039879258440626e-6 | GEN1/ERCC4/RAD51C/UBE2B/RAD54L/RAD50/RAD51AP1/CCNB1IP1/FIGNL1 | 9 |
| BP | GO:0033044 | regulation of chromosome organization | 8/48 | 247/18870 | 1.8478227783973498e-7 | 4.165635263474026e-6 | 2.7823052361223255e-6 | NAT10/CDK5RAP2/GEN1/DUSP1/ERCC4/RAD50/SMC2/FBXO5 | 8 |
| BP | GO:0000070 | mitotic sister chromatid segregation | 7/48 | 184/18870 | 3.9278080766318706e-7 | 8.666248883972872e-6 | 5.788348744510125e-6 | CHMP2B/CDK5RAP2/CHMP4C/GEN1/DUSP1/SMC2/FBXO5 | 7 |
| BP | GO:0006312 | mitotic recombination | 4/48 | 25/18870 | 4.481506377081639e-7 | 9.681921068820125e-6 | 6.4667350792099085e-6 | GEN1/ERCC4/RAD51C/RAD50 | 4 |
| BP | GO:0048599 | oocyte development | 5/48 | 61/18870 | 4.595786085348529e-7 | 9.726184021441682e-6 | 6.49629912816183e-6 | CDC25B/EREG/NPR2/EHMT2/FBXO5 | 5 |
| BP | GO:0070193 | synaptonemal complex organization | 4/48 | 26/18870 | 5.286450978967682e-7 | 1.0964099330378972e-5 | 7.3231257771804934e-6 | UBE2B/SYCP2/EHMT2/AGO4 | 4 |
| BP | GO:0009994 | oocyte differentiation | 5/48 | 65/18870 | 6.332545026612572e-7 | 1.2876174887445563e-5 | 8.600236589290138e-6 | CDC25B/EREG/NPR2/EHMT2/FBXO5 | 5 |
| BP | GO:0051225 | spindle assembly | 6/48 | 133/18870 | 1.053549567271687e-6 | 2.1010209639629604e-5 | 1.4033109620744332e-5 | CHMP2B/CHMP4C/HAUS5/HAUS4/FBXO5/TUBGCP5 | 6 |
| BP | GO:1905818 | regulation of chromosome separation | 5/48 | 74/18870 | 1.2140586505724502e-6 | 2.3589247545873195e-5 | 1.575569698541802e-5 | CDK5RAP2/GEN1/DUSP1/SMC2/FBXO5 | 5 |
| BP | GO:1902115 | regulation of organelle assembly | 7/48 | 218/18870 | 1.228369688984718e-6 | 2.3589247545873195e-5 | 1.575569698541802e-5 | KAT2A/ALMS1/CHMP2B/CDK5RAP2/CHMP4C/CROCC/EHMT2 | 7 |
| BP | GO:2000242 | negative regulation of reproductive process | 5/48 | 76/18870 | 1.3871002849039512e-6 | 2.5983042107892072e-5 | 1.735455687661065e-5 | DUSP1/NPR2/UBE2B/SYCP2/FBXO5 | 5 |
| BP | GO:0001556 | oocyte maturation | 4/48 | 33/18870 | 1.4281903569429587e-6 | 2.5983042107892072e-5 | 1.735455687661065e-5 | CDC25B/EREG/NPR2/FBXO5 | 4 |
| BP | GO:0040020 | regulation of meiotic nuclear division | 4/48 | 33/18870 | 1.4281903569429587e-6 | 2.5983042107892072e-5 | 1.735455687661065e-5 | NPR2/UBE2B/RAD51AP1/FBXO5 | 4 |
| BP | GO:0000819 | sister chromatid segregation | 7/48 | 225/18870 | 1.5168144427935914e-6 | 2.7119596158223352e-5 | 1.8113682456591345e-5 | CHMP2B/CDK5RAP2/CHMP4C/GEN1/DUSP1/SMC2/FBXO5 | 7 |
| BP | GO:0051304 | chromosome separation | 5/48 | 81/18870 | 1.9054950717626632e-6 | 3.349149812572681e-5 | 2.2369594241210206e-5 | CDK5RAP2/GEN1/DUSP1/SMC2/FBXO5 | 5 |
| BP | GO:0051656 | establishment of organelle localization | 9/48 | 469/18870 | 2.376311682479083e-6 | 4.1070586912180157e-5 | 2.743180854510941e-5 | CHMP2B/CDK5RAP2/CHMP4C/FES/CROCC/KIF3A/NDEL1/UBXN2B/UBE2B | 9 |
| BP | GO:0044772 | mitotic cell cycle phase transition | 9/48 | 470/18870 | 2.418137388562945e-6 | 4.110833560557007e-5 | 2.7457021599213423e-5 | CCNF/CDK5RAP2/CHMP4C/GEN1/CDC25B/DUSP1/RAD51C/RAD50/FBXO5 | 9 |
| BP | GO:0007143 | female meiotic nuclear division | 4/48 | 38/18870 | 2.5523729246815896e-6 | 4.2230082233785144e-5 | 2.8206257026676778e-5 | CDC25B/EREG/SYCP2/FBXO5 | 4 |
| BP | GO:2000243 | positive regulation of reproductive process | 5/48 | 86/18870 | 2.5655691231711324e-6 | 4.2230082233785144e-5 | 2.8206257026676778e-5 | CDC25B/LFNG/NPR2/UBE2B/RAD51AP1 | 5 |
| BP | GO:1901990 | regulation of mitotic cell cycle phase transition | 8/48 | 355/18870 | 2.8383351934185254e-6 | 4.5989899930859545e-5 | 3.071750916561496e-5 | CDK5RAP2/CHMP4C/GEN1/CDC25B/DUSP1/RAD51C/RAD50/FBXO5 | 8 |
| BP | GO:0070507 | regulation of microtubule cytoskeleton organization | 6/48 | 161/18870 | 3.20622434820036e-6 | 5.11516099859042e-5 | 3.416511127313096e-5 | CHMP2B/CDK5RAP2/CHMP4C/FES/HAUS5/HAUS4 | 6 |
| BP | GO:1904779 | regulation of protein localization to centrosome | 3/48 | 12/18870 | 3.3440819980260107e-6 | 5.2514790757039485e-5 | 3.507560505317157e-5 | CEP72/CEP250/UBXN2B | 3 |
| BP | GO:0007292 | female gamete generation | 6/48 | 163/18870 | 3.443592836527179e-6 | 5.2514790757039485e-5 | 3.507560505317157e-5 | CDC25B/EREG/NPR2/SYCP2/EHMT2/FBXO5 | 6 |
| BP | GO:1902850 | microtubule cytoskeleton organization involved in mitosis | 6/48 | 163/18870 | 3.443592836527179e-6 | 5.2514790757039485e-5 | 3.507560505317157e-5 | CHMP2B/CDK5RAP2/CHMP4C/WDR62/NDEL1/UBXN2B | 6 |
| BP | GO:0007020 | microtubule nucleation | 4/48 | 45/18870 | 5.085118157102664e-6 | 7.642416708573134e-5 | 5.104512200417319e-5 | HAUS5/HAUS4/NDEL1/TUBGCP5 | 4 |
| BP | GO:0000724 | double-strand break repair via homologous recombination | 6/48 | 175/18870 | 5.187437498625209e-6 | 7.684818122963347e-5 | 5.132832893376522e-5 | GEN1/ERCC4/RAD51C/RAD54L/RAD51AP1/FIGNL1 | 6 |
| BP | GO:0000722 | telomere maintenance via recombination | 3/48 | 14/18870 | 5.5131728537678e-6 | 8.052338379376351e-5 | 5.378306505232339e-5 | ERCC4/RAD51C/RAD50 | 3 |
| BP | GO:0000725 | recombinational repair | 6/48 | 179/18870 | 5.907056757442654e-6 | 8.507802579816711e-5 | 5.6825195122767043e-5 | GEN1/ERCC4/RAD51C/RAD54L/RAD51AP1/FIGNL1 | 6 |
| BP | GO:0010389 | regulation of G2/M transition of mitotic cell cycle | 5/48 | 104/18870 | 6.546936621152278e-6 | 8.893771182262769e-5 | 5.9403151174226275e-5 | CHMP4C/CDC25B/RAD51C/RAD50/FBXO5 | 5 |
| BP | GO:0033046 | negative regulation of sister chromatid segregation | 4/48 | 48/18870 | 6.6038609550070705e-6 | 8.893771182262769e-5 | 5.9403151174226275e-5 | CDK5RAP2/GEN1/DUSP1/FBXO5 | 4 |
| BP | GO:0033048 | negative regulation of mitotic sister chromatid segregation | 4/48 | 48/18870 | 6.6038609550070705e-6 | 8.893771182262769e-5 | 5.9403151174226275e-5 | CDK5RAP2/GEN1/DUSP1/FBXO5 | 4 |
| BP | GO:0045841 | negative regulation of mitotic metaphase/anaphase transition | 4/48 | 48/18870 | 6.6038609550070705e-6 | 8.893771182262769e-5 | 5.9403151174226275e-5 | CDK5RAP2/GEN1/DUSP1/FBXO5 | 4 |
| BP | GO:2000816 | negative regulation of mitotic sister chromatid separation | 4/48 | 48/18870 | 6.6038609550070705e-6 | 8.893771182262769e-5 | 5.9403151174226275e-5 | CDK5RAP2/GEN1/DUSP1/FBXO5 | 4 |
| BP | GO:0051258 | protein polymerization | 7/48 | 286/18870 | 7.385710377301461e-6 | 9.819207258027711e-5 | 6.558431077279839e-5 | CDK5RAP2/FES/HAUS5/HAUS4/NDEL1/FBXO5/TUBGCP5 | 7 |
| BP | GO:0051985 | negative regulation of chromosome segregation | 4/48 | 50/18870 | 7.78706947167566e-6 | 9.969371656947728e-5 | 6.658728671036497e-5 | CDK5RAP2/GEN1/DUSP1/FBXO5 | 4 |
| BP | GO:1902100 | negative regulation of metaphase/anaphase transition of cell cycle | 4/48 | 50/18870 | 7.78706947167566e-6 | 9.969371656947728e-5 | 6.658728671036497e-5 | CDK5RAP2/GEN1/DUSP1/FBXO5 | 4 |
| BP | GO:1905819 | negative regulation of chromosome separation | 4/48 | 50/18870 | 7.78706947167566e-6 | 9.969371656947728e-5 | 6.658728671036497e-5 | CDK5RAP2/GEN1/DUSP1/FBXO5 | 4 |
| BP | GO:0048477 | oogenesis | 5/48 | 110/18870 | 8.614490884823313e-6 | 1.0894179326294849e-4 | 7.276424906564494e-5 | CDC25B/EREG/NPR2/EHMT2/FBXO5 | 5 |
| BP | GO:1901991 | negative regulation of mitotic cell cycle phase transition | 6/48 | 196/18870 | 9.92873717723657e-6 | 1.2404940304571474e-4 | 8.285490250629884e-5 | CDK5RAP2/CHMP4C/GEN1/DUSP1/RAD50/FBXO5 | 6 |
| BP | GO:0045836 | positive regulation of meiotic nuclear division | 3/48 | 17/18870 | 1.0244212407701503e-5 | 1.2497939137395833e-4 | 8.347605900021782e-5 | NPR2/UBE2B/RAD51AP1 | 3 |
| BP | GO:0051447 | negative regulation of meiotic cell cycle | 3/48 | 17/18870 | 1.0244212407701503e-5 | 1.2497939137395833e-4 | 8.347605900021782e-5 | DUSP1/NPR2/FBXO5 | 3 |
| BP | GO:0033047 | regulation of mitotic sister chromatid segregation | 4/48 | 54/18870 | 1.0613854921353957e-5 | 1.2798334364469828e-4 | 8.54824545685545e-5 | CDK5RAP2/GEN1/DUSP1/FBXO5 | 4 |
| BP | GO:1902749 | regulation of cell cycle G2/M phase transition | 5/48 | 116/18870 | 1.1161062725318744e-5 | 1.3303473616270735e-4 | 8.885637354216252e-5 | CHMP4C/CDC25B/RAD51C/RAD50/FBXO5 | 5 |
| BP | GO:0006302 | double-strand break repair | 7/48 | 307/18870 | 1.1710513260566433e-5 | 1.3799775285462944e-4 | 9.217126465852526e-5 | GEN1/ERCC4/RAD51C/RAD54L/RAD50/RAD51AP1/FIGNL1 | 7 |
| BP | GO:0007088 | regulation of mitotic nuclear division | 5/48 | 118/18870 | 1.212906961461642e-5 | 1.4132410326244074e-4 | 9.439299593634067e-5 | CDK5RAP2/GEN1/DUSP1/EREG/FBXO5 | 5 |
| BP | GO:0045839 | negative regulation of mitotic nuclear division | 4/48 | 56/18870 | 1.2280925109434314e-5 | 1.4150354820537093e-4 | 9.451285054979857e-5 | CDK5RAP2/GEN1/DUSP1/FBXO5 | 4 |
| BP | GO:0010965 | regulation of mitotic sister chromatid separation | 4/48 | 59/18870 | 1.5132997255681102e-5 | 1.7244965004550882e-4 | 1.1518232729020433e-4 | CDK5RAP2/GEN1/DUSP1/FBXO5 | 4 |
| BP | GO:0051785 | positive regulation of nuclear division | 4/48 | 60/18870 | 1.6183732008052136e-5 | 1.8241880535163114e-4 | 1.2184091145650234e-4 | EREG/NPR2/UBE2B/RAD51AP1 | 4 |
| BP | GO:0031113 | regulation of microtubule polymerization | 4/48 | 61/18870 | 1.728718136942178e-5 | 1.9276136645258478e-4 | 1.2874890029518428e-4 | CDK5RAP2/FES/HAUS5/HAUS4 | 4 |
| BP | GO:1901987 | regulation of cell cycle phase transition | 8/48 | 456/18870 | 1.7666334347214055e-5 | 1.9489349700064866e-4 | 1.3017298992684038e-4 | CDK5RAP2/CHMP4C/GEN1/CDC25B/DUSP1/RAD51C/RAD50/FBXO5 | 8 |
| BP | GO:0051306 | mitotic sister chromatid separation | 4/48 | 62/18870 | 1.844499087663876e-5 | 2.0134163725341468e-4 | 1.34479822679538e-4 | CDK5RAP2/GEN1/DUSP1/FBXO5 | 4 |
| BP | GO:0051784 | negative regulation of nuclear division | 4/48 | 63/18870 | 1.9658825713231897e-5 | 2.083810859413518e-4 | 1.3918160132914733e-4 | CDK5RAP2/GEN1/DUSP1/FBXO5 | 4 |
| BP | GO:0090231 | regulation of spindle checkpoint | 3/48 | 21/18870 | 1.9893662013687397e-5 | 2.083810859413518e-4 | 1.3918160132914733e-4 | CDK5RAP2/GEN1/DUSP1 | 3 |
| BP | GO:0090266 | regulation of mitotic cell cycle spindle assembly checkpoint | 3/48 | 21/18870 | 1.9893662013687397e-5 | 2.083810859413518e-4 | 1.3918160132914733e-4 | CDK5RAP2/GEN1/DUSP1 | 3 |
| BP | GO:1903504 | regulation of mitotic spindle checkpoint | 3/48 | 21/18870 | 1.9893662013687397e-5 | 2.083810859413518e-4 | 1.3918160132914733e-4 | CDK5RAP2/GEN1/DUSP1 | 3 |
| BP | GO:0051983 | regulation of chromosome segregation | 5/48 | 131/18870 | 2.0127808097501498e-5 | 2.087253699710905e-4 | 1.3941155503322086e-4 | CDK5RAP2/GEN1/DUSP1/SMC2/FBXO5 | 5 |
| BP | GO:0007130 | synaptonemal complex assembly | 3/48 | 23/18870 | 2.6395429719276107e-5 | 2.683535354793071e-4 | 1.7923831532800494e-4 | SYCP2/EHMT2/AGO4 | 3 |
| BP | GO:0046599 | regulation of centriole replication | 3/48 | 23/18870 | 2.6395429719276107e-5 | 2.683535354793071e-4 | 1.7923831532800494e-4 | KAT2A/ALMS1/CDK5RAP2 | 3 |
| BP | GO:0000086 | G2/M transition of mitotic cell cycle | 5/48 | 140/18870 | 2.7722920928543988e-5 | 2.791132912902924e-4 | 1.8642495626961618e-4 | CHMP4C/CDC25B/RAD51C/RAD50/FBXO5 | 5 |
| BP | GO:0007093 | mitotic cell cycle checkpoint signaling | 5/48 | 142/18870 | 2.9678230874261145e-5 | 2.959262059289309e-4 | 1.9765461452696186e-4 | CDK5RAP2/CHMP4C/GEN1/DUSP1/RAD50 | 5 |
| BP | GO:0007281 | germ cell development | 7/48 | 359/18870 | 3.202087091331395e-5 | 3.162442203533959e-4 | 2.1122539409484286e-4 | CDC25B/EREG/NPR2/UBE2B/EHMT2/FBXO5/CCNB1IP1 | 7 |
| BP | GO:0045930 | negative regulation of mitotic cell cycle | 6/48 | 248/18870 | 3.749525306518552e-5 | 3.6681676819431497e-4 | 0.00024500373899594905 | CDK5RAP2/CHMP4C/GEN1/DUSP1/RAD50/FBXO5 | 6 |
| BP | GO:0031468 | nuclear membrane reassembly | 3/48 | 26/18870 | 3.854380658600305e-5 | 3.7355072364191744e-4 | 2.495014730308904e-4 | CHMP2B/CHMP4C/UBXN2B | 3 |
| BP | GO:0007141 | male meiosis I | 3/48 | 27/18870 | 4.3284354113166274e-5 | 4.1560995569771687e-4 | 2.7759361604740165e-4 | MYBL1/RAD51C/TDRD9 | 3 |
| BP | GO:0044839 | cell cycle G2/M phase transition | 5/48 | 155/18870 | 4.513940702330223e-5 | 4.294455512216919e-4 | 2.8683466751649317e-4 | CHMP4C/CDC25B/RAD51C/RAD50/FBXO5 | 5 |
| BP | GO:0010971 | positive regulation of G2/M transition of mitotic cell cycle | 3/48 | 29/18870 | 5.3879236006232376e-5 | 5.079342521678452e-4 | 3.3925873006795124e-4 | CDC25B/RAD51C/FBXO5 | 3 |
| BP | GO:1901988 | negative regulation of cell cycle phase transition | 6/48 | 277/18870 | 6.931890270005583e-5 | 6.476009198194405e-4 | 4.325446939462943e-4 | CDK5RAP2/CHMP4C/GEN1/DUSP1/RAD50/FBXO5 | 6 |
| BP | GO:0044782 | cilium organization | 7/48 | 407/18870 | 7.08055740050307e-5 | 6.555837521715789e-4 | 4.378765760837425e-4 | RTTN/TMEM67/POC1B/CROCC/KIF3A/CEP250/UBE2B | 7 |
| BP | GO:1902751 | positive regulation of cell cycle G2/M phase transition | 3/48 | 32/18870 | 7.27456024735286e-5 | 6.675857501331783e-4 | 4.4589293365236894e-4 | CDC25B/RAD51C/FBXO5 | 3 |
| BP | GO:0030071 | regulation of mitotic metaphase/anaphase transition | 4/48 | 90/18870 | 8.019289661756517e-5 | 7.2947398063522e-4 | 4.8722923337357225e-4 | CDK5RAP2/GEN1/DUSP1/FBXO5 | 4 |
| BP | GO:0071539 | protein localization to centrosome | 3/48 | 34/18870 | 8.745106093698076e-5 | 7.885804364491223e-4 | 5.267075340643784e-4 | CEP72/CEP250/UBXN2B | 3 |
| BP | GO:1902099 | regulation of metaphase/anaphase transition of cell cycle | 4/48 | 93/18870 | 9.112352723168591e-5 | 8.146129115453301e-4 | 5.440951081528977e-4 | CDK5RAP2/GEN1/DUSP1/FBXO5 | 4 |
| BP | GO:0007091 | metaphase/anaphase transition of mitotic cell cycle | 4/48 | 94/18870 | 9.499645285728785e-5 | 8.250969201021496e-4 | 5.51097572377013e-4 | CDK5RAP2/GEN1/DUSP1/FBXO5 | 4 |
| BP | GO:0000132 | establishment of mitotic spindle orientation | 3/48 | 35/18870 | 9.54789107157743e-5 | 8.250969201021496e-4 | 5.51097572377013e-4 | CDK5RAP2/NDEL1/UBXN2B | 3 |
| BP | GO:0032205 | negative regulation of telomere maintenance | 3/48 | 35/18870 | 9.54789107157743e-5 | 8.250969201021496e-4 | 5.51097572377013e-4 | NAT10/ERCC4/RAD50 | 3 |
| BP | GO:1905508 | protein localization to microtubule organizing center | 3/48 | 35/18870 | 9.54789107157743e-5 | 8.250969201021496e-4 | 5.51097572377013e-4 | CEP72/CEP250/UBXN2B | 3 |
| BP | GO:0009314 | response to radiation | 7/48 | 428/18870 | 9.697569503415858e-5 | 8.311057500034913e-4 | 5.551109815787415e-4 | GADD45A/CEP250/ERCC4/UBE2B/RAD54L/RAD51AP1/FIGNL1 | 7 |
| BP | GO:0031110 | regulation of microtubule polymerization or depolymerization | 4/48 | 95/18870 | 9.898768226457754e-5 | 8.413952992489091e-4 | 5.619835628135635e-4 | CDK5RAP2/FES/HAUS5/HAUS4 | 4 |
| BP | GO:0044784 | metaphase/anaphase transition of cell cycle | 4/48 | 97/18870 | 1.0733381016363274e-4 | 9.049200092657492e-4 | 6.044128976266182e-4 | CDK5RAP2/GEN1/DUSP1/FBXO5 | 4 |
| BP | GO:0000075 | cell cycle checkpoint signaling | 5/48 | 192/18870 | 1.242816941933761e-4 | 0.001039355781278476 | 6.942050490597748e-4 | CDK5RAP2/CHMP4C/GEN1/DUSP1/RAD50 | 5 |
| BP | GO:0033045 | regulation of sister chromatid segregation | 4/48 | 104/18870 | 1.4059711199053271e-4 | 0.0011663936410734592 | 7.790559973875412e-4 | CDK5RAP2/GEN1/DUSP1/FBXO5 | 4 |
| BP | GO:0040001 | establishment of mitotic spindle localization | 3/48 | 40/18870 | 1.4284900201231334e-4 | 0.0011756699610061027 | 7.852518239273365e-4 | CDK5RAP2/NDEL1/UBXN2B | 3 |
| BP | GO:0051303 | establishment of chromosome localization | 4/48 | 108/18870 | 1.6265020885805896e-4 | 0.00132809658728982 | 8.870604013974537e-4 | CHMP2B/CHMP4C/NDEL1/UBE2B | 4 |
| BP | GO:0051294 | establishment of spindle orientation | 3/48 | 42/18870 | 1.6539088527804956e-4 | 0.0013399245940104484 | 8.949605469815511e-4 | CDK5RAP2/NDEL1/UBXN2B | 3 |
| BP | GO:0071763 | nuclear membrane organization | 3/48 | 44/18870 | 1.9012469125354728e-4 | 0.001528366704107973 | 0.001020824535657561 | CHMP2B/CHMP4C/UBXN2B | 3 |
| BP | GO:0050000 | chromosome localization | 4/48 | 116/18870 | 2.1410550252869102e-4 | 0.0016679615068609266 | 0.0011140624996340556 | CHMP2B/CHMP4C/NDEL1/UBE2B | 4 |
| BP | GO:0007094 | mitotic spindle assembly checkpoint signaling | 3/48 | 46/18870 | 2.171406011824736e-4 | 0.0016679615068609266 | 0.0011140624996340556 | CDK5RAP2/GEN1/DUSP1 | 3 |
| BP | GO:0071173 | spindle assembly checkpoint signaling | 3/48 | 46/18870 | 2.171406011824736e-4 | 0.0016679615068609266 | 0.0011140624996340556 | CDK5RAP2/GEN1/DUSP1 | 3 |
| BP | GO:0071174 | mitotic spindle checkpoint signaling | 3/48 | 46/18870 | 2.171406011824736e-4 | 0.0016679615068609266 | 0.0011140624996340556 | CDK5RAP2/GEN1/DUSP1 | 3 |
| BP | GO:1901976 | regulation of cell cycle checkpoint | 3/48 | 46/18870 | 2.171406011824736e-4 | 0.0016679615068609266 | 0.0011140624996340556 | CDK5RAP2/GEN1/DUSP1 | 3 |
| BP | GO:1902116 | negative regulation of organelle assembly | 3/48 | 46/18870 | 2.171406011824736e-4 | 0.0016679615068609266 | 0.0011140624996340556 | KAT2A/CDK5RAP2/EHMT2 | 3 |
| BP | GO:0031577 | spindle checkpoint signaling | 3/48 | 47/18870 | 2.3153213048702866e-4 | 0.0017654324949635935 | 0.0011791651846785206 | CDK5RAP2/GEN1/DUSP1 | 3 |
| BP | GO:0007033 | vacuole organization | 5/48 | 232/18870 | 2.994689288899152e-4 | 0.0022667830602835187 | 0.0015140265479029135 | CHMP2B/CHMP4C/UBXN2B/NPR2/EHMT2 | 5 |
| BP | GO:0001547 | antral ovarian follicle growth | 2/48 | 11/18870 | 3.434212559470014e-4 | 0.0025257293788442585 | 0.0016869816081607086 | EREG/NPR2 | 2 |
| BP | GO:0051469 | vesicle fusion with vacuole | 2/48 | 11/18870 | 3.434212559470014e-4 | 0.0025257293788442585 | 0.0016869816081607086 | CHMP2B/CHMP4C | 2 |
| BP | GO:0061763 | multivesicular body-lysosome fusion | 2/48 | 11/18870 | 3.434212559470014e-4 | 0.0025257293788442585 | 0.0016869816081607086 | CHMP2B/CHMP4C | 2 |
| BP | GO:0141007 | siRNA-mediated retrotransposon silencing by heterochromatin formation | 2/48 | 11/18870 | 3.434212559470014e-4 | 0.0025257293788442585 | 0.0016869816081607086 | MYBL1/TDRD9 | 2 |
| BP | GO:0006998 | nuclear envelope organization | 3/48 | 54/18870 | 3.4977852395066174e-4 | 0.002554368516456593 | 0.0017061102206044137 | CHMP2B/CHMP4C/UBXN2B | 3 |
| BP | GO:0072698 | protein localization to microtubule cytoskeleton | 3/48 | 55/18870 | 3.6929891985660836e-4 | 0.0026780627964426776 | 0.001788727929817065 | CEP72/CEP250/UBXN2B | 3 |
| BP | GO:0060271 | cilium assembly | 6/48 | 378/18870 | 3.74461091388489e-4 | 0.0026966399428462713 | 0.001801135951269194 | TMEM67/POC1B/CROCC/KIF3A/CEP250/UBE2B | 6 |
| BP | GO:0001541 | ovarian follicle development | 3/48 | 56/18870 | 3.895074855970144e-4 | 0.0027856500866489924 | 0.0018605874811095133 | EREG/LFNG/NPR2 | 3 |
| BP | GO:0000018 | regulation of DNA recombination | 4/48 | 136/18870 | 3.927974302746986e-4 | 0.002789937912293578 | 0.0018634513995728307 | UBE2B/RAD50/RAD51AP1/FIGNL1 | 4 |
| BP | GO:0051293 | establishment of spindle localization | 3/48 | 57/18870 | 4.1041439095647266e-4 | 0.002844398988627054 | 0.0018998269649460502 | CDK5RAP2/NDEL1/UBXN2B | 3 |
| BP | GO:0022605 | mammalian oogenesis stage | 2/48 | 12/18870 | 4.1143669073679664e-4 | 0.002844398988627054 | 0.0018998269649460502 | EREG/NPR2 | 2 |
| BP | GO:0035112 | genitalia morphogenesis | 2/48 | 12/18870 | 4.1143669073679664e-4 | 0.002844398988627054 | 0.0018998269649460502 | NPR2/SYCP2 | 2 |
| BP | GO:0097576 | vacuole fusion | 2/48 | 12/18870 | 4.1143669073679664e-4 | 0.002844398988627054 | 0.0018998269649460502 | CHMP2B/CHMP4C | 2 |
| BP | GO:0010212 | response to ionizing radiation | 4/48 | 138/18870 | 4.151429238696043e-4 | 0.0028510146493561568 | 0.0019042456877392793 | GADD45A/RAD54L/RAD51AP1/FIGNL1 | 4 |
| BP | GO:0044380 | protein localization to cytoskeleton | 3/48 | 59/18870 | 4.5436347340793357e-4 | 0.0030998350126580734 | 0.002070437434227287 | CEP72/CEP250/UBXN2B | 3 |
| BP | GO:0071709 | membrane assembly | 3/48 | 60/18870 | 4.774255650605589e-4 | 0.003235884385410455 | 0.002161307339593036 | CHMP2B/CHMP4C/UBXN2B | 3 |
| BP | GO:0007144 | female meiosis I | 2/48 | 13/18870 | 4.8545435534592084e-4 | 0.00326239464608631 | 0.00217901403555275 | CDC25B/FBXO5 | 2 |
| BP | GO:0006997 | nucleus organization | 4/48 | 144/18870 | 4.876289008132864e-4 | 0.00326239464608631 | 0.00217901403555275 | CHMP2B/CHMP4C/UBXN2B/NDC1 | 4 |
| BP | GO:0051053 | negative regulation of DNA metabolic process | 4/48 | 146/18870 | 5.136758476822651e-4 | 0.0034146272695289035 | 0.002280693034918559 | NAT10/ERCC4/RAD50/FBXO5 | 4 |
| BP | GO:0051653 | spindle localization | 3/48 | 62/18870 | 5.257740043576227e-4 | 0.0034727875319672274 | 0.002319539355463062 | CDK5RAP2/NDEL1/UBXN2B | 3 |
| BP | GO:0007100 | mitotic centrosome separation | 2/48 | 14/18870 | 5.654445524279456e-4 | 0.0036647875054236227 | 0.0024477797072209747 | NDEL1/UBXN2B | 2 |
| BP | GO:0046761 | viral budding from plasma membrane | 2/48 | 14/18870 | 5.654445524279456e-4 | 0.0036647875054236227 | 0.0024477797072209747 | CHMP2B/CHMP4C | 2 |
| BP | GO:0097212 | lysosomal membrane organization | 2/48 | 14/18870 | 5.654445524279456e-4 | 0.0036647875054236227 | 0.0024477797072209747 | CHMP2B/CHMP4C | 2 |
| BP | GO:0044091 | membrane biogenesis | 3/48 | 64/18870 | 5.77152684248325e-4 | 0.0037174368544441805 | 0.002482945186239934 | CHMP2B/CHMP4C/UBXN2B | 3 |
| BP | GO:0046753 | non-lytic viral release | 2/48 | 15/18870 | 6.513776914393231e-4 | 0.004118772353796207 | 0.0027510046275165245 | CHMP2B/CHMP4C | 2 |
| BP | GO:0051299 | centrosome separation | 2/48 | 15/18870 | 6.513776914393231e-4 | 0.004118772353796207 | 0.0027510046275165245 | NDEL1/UBXN2B | 2 |
| BP | GO:0141005 | retrotransposon silencing by heterochromatin formation | 2/48 | 15/18870 | 6.513776914393231e-4 | 0.004118772353796207 | 0.0027510046275165245 | MYBL1/TDRD9 | 2 |
| BP | GO:0000723 | telomere maintenance | 4/48 | 156/18870 | 6.589792120062353e-4 | 0.004141584502124037 | 0.0027662412854870997 | NAT10/ERCC4/RAD51C/RAD50 | 4 |
| BP | GO:0006260 | DNA replication | 5/48 | 278/18870 | 6.829822350565034e-4 | 0.00426658179369635 | 0.0028497293003625825 | GEN1/EREG/RAD50/EHMT2/FBXO5 | 5 |
| BP | GO:0071479 | cellular response to ionizing radiation | 3/48 | 70/18870 | 7.502268216328443e-4 | 0.0046585940960075425 | 0.0031115616050073217 | GADD45A/RAD51AP1/FIGNL1 | 3 |
| BP | GO:0051494 | negative regulation of cytoskeleton organization | 4/48 | 163/18870 | 7.766174894566289e-4 | 0.004793763908134073 | 0.003201844035479084 | CCNF/KAT2A/CDK5RAP2/TMEM67 | 4 |
| BP | GO:0007548 | sex differentiation | 5/48 | 288/18870 | 8.006992593342706e-4 | 0.0049131664611221215 | 0.0032815952204419186 | EREG/LFNG/NPR2/SYCP2/AGO4 | 5 |
| BP | GO:0032510 | endosome to lysosome transport via multivesicular body sorting pathway | 2/48 | 17/18870 | 8.409549650927728e-4 | 0.005129825287065914 | 0.003426305678210802 | CHMP2B/CHMP4C | 2 |
| BP | GO:0035234 | ectopic germ cell programmed cell death | 2/48 | 18/18870 | 9.445404496691551e-4 | 0.005694700269226243 | 0.0038035961804302573 | UBE2B/SYCP2 | 2 |
| BP | GO:0061952 | midbody abscission | 2/48 | 18/18870 | 9.445404496691551e-4 | 0.005694700269226243 | 0.0038035961804302573 | CHMP2B/CHMP4C | 2 |
| BP | GO:0048608 | reproductive structure development | 5/48 | 305/18870 | 0.0010348403280782581 | 0.006203060232469097 | 0.004143139250839634 | EREG/LFNG/NPR2/SYCP2/AGO4 | 5 |
| BP | GO:0010968 | regulation of microtubule nucleation | 2/48 | 19/18870 | 0.0010539515753820818 | 0.00628130910155873 | 0.004195403125235389 | HAUS5/HAUS4 | 2 |
| BP | GO:0061458 | reproductive system development | 5/48 | 309/18870 | 0.001096638428128699 | 0.006498365999825491 | 0.004340379462909376 | EREG/LFNG/NPR2/SYCP2/AGO4 | 5 |
| BP | GO:0071478 | cellular response to radiation | 4/48 | 181/18870 | 0.001146240413078667 | 0.006717997186138896 | 0.004487075215428506 | GADD45A/ERCC4/RAD51AP1/FIGNL1 | 4 |
| BP | GO:0010833 | telomere maintenance via telomere lengthening | 3/48 | 81/18870 | 0.0011466591147025887 | 0.006717997186138896 | 0.004487075215428506 | NAT10/ERCC4/RAD50 | 3 |
| BP | GO:0051302 | regulation of cell division | 4/48 | 186/18870 | 0.0012675858789184683 | 0.007384755935047481 | 0.004932415779588126 | KAT2A/CHMP4C/CDC25B/EREG | 4 |
| BP | GO:0032200 | telomere organization | 4/48 | 187/18870 | 0.0012928926089726639 | 0.007490109695556717 | 0.005002783514872172 | NAT10/ERCC4/RAD51C/RAD50 | 4 |
| BP | GO:0039702 | viral budding via host ESCRT complex | 2/48 | 22/18870 | 0.001416848708041728 | 0.008072923682633362 | 0.005392055811980665 | CHMP2B/CHMP4C | 2 |
| BP | GO:1901673 | regulation of mitotic spindle assembly | 2/48 | 22/18870 | 0.001416848708041728 | 0.008072923682633362 | 0.005392055811980665 | CHMP2B/CHMP4C | 2 |
| BP | GO:1902774 | late endosome to lysosome transport | 2/48 | 22/18870 | 0.001416848708041728 | 0.008072923682633362 | 0.005392055811980665 | CHMP2B/CHMP4C | 2 |
| BP | GO:0048469 | cell maturation | 4/48 | 195/18870 | 0.0015082412574794453 | 0.008546700459050191 | 0.005708500128970232 | CDC25B/EREG/NPR2/FBXO5 | 4 |
| BP | GO:0032271 | regulation of protein polymerization | 4/48 | 204/18870 | 0.0017791169877207126 | 0.010026871284056408 | 0.006697133740962408 | CDK5RAP2/FES/HAUS5/HAUS4 | 4 |
| BP | GO:0010623 | programmed cell death involved in cell development | 2/48 | 25/18870 | 0.0018311366681618584 | 0.01020907916604219 | 0.006818833772781567 | UBE2B/SYCP2 | 2 |
| BP | GO:0046755 | viral budding | 2/48 | 25/18870 | 0.0018311366681618584 | 0.01020907916604219 | 0.006818833772781567 | CHMP2B/CHMP4C | 2 |
| BP | GO:0009566 | fertilization | 4/48 | 207/18870 | 0.0018764546641587775 | 0.010405794046698676 | 0.006950223298713625 | NPR2/SYCP2/EHMT2/TDRD9 | 4 |
| BP | GO:1904353 | regulation of telomere capping | 2/48 | 26/18870 | 0.001980519406626516 | 0.01088154344718669 | 0.007267985167993544 | ERCC4/RAD50 | 2 |
| BP | GO:1901992 | positive regulation of mitotic cell cycle phase transition | 3/48 | 98/18870 | 0.0019832321229684515 | 0.01088154344718669 | 0.007267985167993544 | CDC25B/RAD51C/FBXO5 | 3 |
| BP | GO:1902410 | mitotic cytokinetic process | 2/48 | 27/18870 | 0.002135498210827585 | 0.011594301804336155 | 0.0077440497256795315 | CHMP2B/CHMP4C | 2 |
| BP | GO:1904357 | negative regulation of telomere maintenance via telomere lengthening | 2/48 | 27/18870 | 0.002135498210827585 | 0.011594301804336155 | 0.0077440497256795315 | NAT10/ERCC4 | 2 |
| BP | GO:0008585 | female gonad development | 3/48 | 101/18870 | 0.002161455816731122 | 0.011674112926823821 | 0.007797357058163805 | EREG/LFNG/NPR2 | 3 |
| BP | GO:0032204 | regulation of telomere maintenance | 3/48 | 104/18870 | 0.002349342883841392 | 0.012623153215251417 | 0.008431238710486151 | NAT10/ERCC4/RAD50 | 3 |
| BP | GO:0046545 | development of primary female sexual characteristics | 3/48 | 105/18870 | 0.0024141502162429527 | 0.012904503990948153 | 0.008619158124188078 | EREG/LFNG/NPR2 | 3 |
| BP | GO:0001778 | plasma membrane repair | 2/48 | 29/18870 | 0.002462131190372565 | 0.012960558601098224 | 0.008656598040422911 | CHMP2B/CHMP4C | 2 |
| BP | GO:0019076 | viral release from host cell | 2/48 | 29/18870 | 0.002462131190372565 | 0.012960558601098224 | 0.008656598040422911 | CHMP2B/CHMP4C | 2 |
| BP | GO:0035891 | exit from host cell | 2/48 | 29/18870 | 0.002462131190372565 | 0.012960558601098224 | 0.008656598040422911 | CHMP2B/CHMP4C | 2 |
| BP | GO:0007163 | establishment or maintenance of cell polarity | 4/48 | 228/18870 | 0.0026636447867333666 | 0.013950503251729803 | 0.009317800476717463 | CDK5RAP2/NDEL1/PARD6B/UBXN2B | 4 |
| BP | GO:0036258 | multivesicular body assembly | 2/48 | 31/18870 | 0.002810810974998474 | 0.014647291362177977 | 0.009783198209727562 | CHMP2B/CHMP4C | 2 |
| BP | GO:0008406 | gonad development | 4/48 | 233/18870 | 0.0028799757287662348 | 0.014932674153652925 | 0.009973810681727275 | EREG/LFNG/NPR2/AGO4 | 4 |
| BP | GO:0031116 | positive regulation of microtubule polymerization | 2/48 | 32/18870 | 0.0029933486665001383 | 0.015252933331552063 | 0.010187717740609307 | CDK5RAP2/FES | 2 |
| BP | GO:0036257 | multivesicular body organization | 2/48 | 32/18870 | 0.0029933486665001383 | 0.015252933331552063 | 0.010187717740609307 | CHMP2B/CHMP4C | 2 |
| BP | GO:0090169 | regulation of spindle assembly | 2/48 | 32/18870 | 0.0029933486665001383 | 0.015252933331552063 | 0.010187717740609307 | CHMP2B/CHMP4C | 2 |
| BP | GO:1902903 | regulation of supramolecular fiber organization | 5/48 | 389/18870 | 0.0030005770488299144 | 0.015252933331552063 | 0.010187717740609307 | ALMS1/CDK5RAP2/FES/HAUS5/HAUS4 | 5 |
| BP | GO:0045137 | development of primary sexual characteristics | 4/48 | 238/18870 | 0.003108076054402221 | 0.015722316431293185 | 0.010501227439263988 | EREG/LFNG/NPR2/AGO4 | 4 |
| BP | GO:0010526 | retrotransposon silencing | 2/48 | 34/18870 | 0.003374681026879502 | 0.016906010748183785 | 0.011291838879668 | MYBL1/TDRD9 | 2 |
| BP | GO:0019068 | virion assembly | 2/48 | 34/18870 | 0.003374681026879502 | 0.016906010748183785 | 0.011291838879668 | CHMP2B/CHMP4C | 2 |
| BP | GO:1901989 | positive regulation of cell cycle phase transition | 3/48 | 119/18870 | 0.0034397648197893194 | 0.017149212106353482 | 0.011454277588164839 | CDC25B/RAD51C/FBXO5 | 3 |
| BP | GO:0016570 | histone modification | 3/48 | 120/18870 | 0.0035217123445708603 | 0.01739055095866658 | 0.011615472294374065 | KAT2A/UBE2B/EHMT2 | 3 |
| BP | GO:0046660 | female sex differentiation | 3/48 | 120/18870 | 0.0035217123445708603 | 0.01739055095866658 | 0.011615472294374065 | EREG/LFNG/NPR2 | 3 |
| BP | GO:0031112 | positive regulation of microtubule polymerization or depolymerization | 2/48 | 36/18870 | 0.0037775057016909315 | 0.018477704776667436 | 0.01234160254077772 | CDK5RAP2/FES | 2 |
| BP | GO:0032197 | retrotransposition | 2/48 | 36/18870 | 0.0037775057016909315 | 0.018477704776667436 | 0.01234160254077772 | MYBL1/TDRD9 | 2 |
| BP | GO:0006275 | regulation of DNA replication | 3/48 | 124/18870 | 0.003861445734355385 | 0.018799620781814713 | 0.012556616225380988 | EREG/EHMT2/FBXO5 | 3 |
| BP | GO:0001578 | microtubule bundle formation | 3/48 | 125/18870 | 0.0039493915767560015 | 0.01913793955652324 | 0.012782585624719374 | CDK5RAP2/FES/UBE2B | 3 |
| BP | GO:0043162 | ubiquitin-dependent protein catabolic process via the multivesicular body sorting pathway | 2/48 | 37/18870 | 0.003986909161250504 | 0.01914085555655913 | 0.012784533275354927 | CHMP2B/CHMP4C | 2 |
| BP | GO:0045324 | late endosome to vacuole transport | 2/48 | 37/18870 | 0.003986909161250504 | 0.01914085555655913 | 0.012784533275354927 | CHMP2B/CHMP4C | 2 |
| BP | GO:0007616 | long-term memory | 2/48 | 38/18870 | 0.004201603703640027 | 0.01998494212825759 | 0.0133483143890712 | KAT2A/EHMT2 | 2 |
| BP | GO:0032196 | transposition | 2/48 | 38/18870 | 0.004201603703640027 | 0.01998494212825759 | 0.0133483143890712 | MYBL1/TDRD9 | 2 |
| BP | GO:0045931 | positive regulation of mitotic cell cycle | 3/48 | 128/18870 | 0.0042205422623803395 | 0.01998494212825759 | 0.0133483143890712 | CDC25B/RAD51C/FBXO5 | 3 |
| BP | GO:0071695 | anatomical structure maturation | 4/48 | 261/18870 | 0.00431763433267495 | 0.02035175819538147 | 0.013593317659809171 | CDC25B/EREG/NPR2/FBXO5 | 4 |
| BP | GO:0007052 | mitotic spindle organization | 3/48 | 130/18870 | 0.004407454169539815 | 0.020653873898004764 | 0.013795106354247714 | CHMP2B/CHMP4C/WDR62 | 3 |
| BP | GO:0016233 | telomere capping | 2/48 | 39/18870 | 0.004421562203815871 | 0.020653873898004764 | 0.013795106354247714 | ERCC4/RAD50 | 2 |
| BP | GO:0036297 | interstrand cross-link repair | 2/48 | 40/18870 | 0.004646757635489739 | 0.021608464878936588 | 0.014432695417286985 | ERCC4/RAD51AP1 | 2 |
| BP | GO:0032509 | endosome transport via multivesicular body sorting pathway | 2/48 | 41/18870 | 0.0048771630708186265 | 0.022578652251959444 | 0.015080701600557595 | CHMP2B/CHMP4C | 2 |
| BP | GO:0060236 | regulation of mitotic spindle organization | 2/48 | 42/18870 | 0.0051127516800956695 | 0.023459838461323934 | 0.01566926225199325 | CHMP2B/CHMP4C | 2 |
| BP | GO:0090148 | membrane fission | 2/48 | 42/18870 | 0.0051127516800956695 | 0.023459838461323934 | 0.01566926225199325 | CHMP2B/CHMP4C | 2 |
| BP | GO:0032506 | cytokinetic process | 2/48 | 43/18870 | 0.005353496731441779 | 0.024456282425132706 | 0.016334805700388085 | CHMP2B/CHMP4C | 2 |
| BP | GO:1900744 | regulation of p38MAPK cascade | 2/48 | 45/18870 | 0.005850349720120721 | 0.02660882745511047 | 0.01777253054404171 | GADD45A/DUSP1 | 2 |
| BP | GO:0047496 | vesicle transport along microtubule | 2/48 | 46/18870 | 0.006106404680072449 | 0.027531920231457088 | 0.018389081370652958 | KIF3A/NDEL1 | 2 |
| BP | GO:0090224 | regulation of spindle organization | 2/48 | 46/18870 | 0.006106404680072449 | 0.027531920231457088 | 0.018389081370652958 | CHMP2B/CHMP4C | 2 |
| BP | GO:0048806 | genitalia development | 2/48 | 47/18870 | 0.0063675101267207 | 0.028461672419867957 | 0.01901008014238757 | NPR2/SYCP2 | 2 |
| BP | GO:0071985 | multivesicular body sorting pathway | 2/48 | 47/18870 | 0.0063675101267207 | 0.028461672419867957 | 0.01901008014238757 | CHMP2B/CHMP4C | 2 |
| BP | GO:0051054 | positive regulation of DNA metabolic process | 4/48 | 298/18870 | 0.006872609614857109 | 0.030587537212904813 | 0.02042998475977401 | EREG/UBE2B/RAD50/RAD51AP1 | 4 |
| BP | GO:0031297 | replication fork processing | 2/48 | 49/18870 | 0.006904767586770414 | 0.030599333279832993 | 0.020437863572176935 | GEN1/RAD50 | 2 |
| BP | GO:0022602 | ovulation cycle process | 2/48 | 50/18870 | 0.007180867393193195 | 0.031687487177622736 | 0.02116466179046415 | EREG/NPR2 | 2 |
| BP | GO:0030010 | establishment of cell polarity | 3/48 | 156/18870 | 0.007301904086146844 | 0.03208506159887405 | 0.02143020913775479 | CDK5RAP2/NDEL1/UBXN2B | 3 |
| BP | GO:0006261 | DNA-templated DNA replication | 3/48 | 161/18870 | 0.007960932842584964 | 0.03483327999055109 | 0.023265795293896985 | GEN1/RAD50/FBXO5 | 3 |
| BP | GO:0045005 | DNA-templated DNA replication maintenance of fidelity | 2/48 | 56/18870 | 0.008940431777615603 | 0.03895473845961084 | 0.026018594027735813 | GEN1/RAD50 | 2 |
| BP | GO:0007080 | mitotic metaphase chromosome alignment | 2/48 | 57/18870 | 0.009250614228039572 | 0.039970362310320987 | 0.026696948079166834 | CHMP2B/CHMP4C | 2 |
| BP | GO:0038066 | p38MAPK cascade | 2/48 | 57/18870 | 0.009250614228039572 | 0.039970362310320987 | 0.026696948079166834 | GADD45A/DUSP1 | 2 |
| BP | GO:0021700 | developmental maturation | 4/48 | 330/18870 | 0.009762086248119502 | 0.04200532547427354 | 0.028056137808528638 | CDC25B/EREG/NPR2/FBXO5 | 4 |
| BP | GO:0016236 | macroautophagy | 4/48 | 331/18870 | 0.009863312354788262 | 0.04218522362774282 | 0.028176295129731282 | CHMP2B/CHMP4C/UBXN2B/EHMT2 | 4 |
| BP | GO:0097352 | autophagosome maturation | 2/48 | 59/18870 | 0.009885254909876089 | 0.04218522362774282 | 0.028176295129731282 | CHMP2B/CHMP4C | 2 |
| BP | GO:0071214 | cellular response to abiotic stimulus | 4/48 | 334/18870 | 0.010171098184702418 | 0.04305072986749554 | 0.028754382837955707 | GADD45A/ERCC4/RAD51AP1/FIGNL1 | 4 |
| BP | GO:0104004 | cellular response to environmental stimulus | 4/48 | 334/18870 | 0.010171098184702418 | 0.04305072986749554 | 0.028754382837955707 | GADD45A/ERCC4/RAD51AP1/FIGNL1 | 4 |
| BP | GO:0035265 | organ growth | 3/48 | 177/18870 | 0.010300884409128503 | 0.04342283387100105 | 0.0290029180197114 | FES/NPR2/EHMT2 | 3 |
| BP | GO:1904356 | regulation of telomere maintenance via telomere lengthening | 2/48 | 61/18870 | 0.010538762377369958 | 0.04424573516329006 | 0.02955254909145294 | NAT10/ERCC4 | 2 |
| BP | GO:0061025 | membrane fusion | 3/48 | 183/18870 | 0.011270800019117056 | 0.047128304918646724 | 0.03147787102113337 | CHMP2B/CHMP4C/UBXN2B | 3 |
| BP | GO:0098930 | axonal transport | 2/48 | 65/18870 | 0.011901579884378698 | 0.04956601743012334 | 0.033106064527250824 | KIF3A/NDEL1 | 2 |
| CC | GO:0005819 | spindle | 16/48 | 431/19886 | 2.149909886976357e-15 | 2.923877446287846e-13 | 1.9688648438625587e-13 | KAT2A/ALMS1/CHMP2B/CDK5RAP2/CHMP4C/POC1B/WDR62/KIF3A/HAUS5/HAUS4/NDEL1/UBXN2B/HEPACAM2/CDC25B/FBXO5/TUBGCP5 | 16 |
| CC | GO:0005814 | centriole | 8/48 | 157/19886 | 3.642611378613932e-9 | 2.4769757374574735e-7 | 1.6679325786284844e-7 | CCNF/ALMS1/RTTN/POC1B/WDR62/CROCC/KIF3A/CEP250 | 8 |
| CC | GO:0000922 | spindle pole | 7/48 | 176/19886 | 2.0466798383791793e-7 | 9.278281933985613e-6 | 6.247759506631179e-6 | ALMS1/CDK5RAP2/POC1B/WDR62/UBXN2B/CDC25B/TUBGCP5 | 7 |
| CC | GO:0005876 | spindle microtubule | 5/48 | 81/19886 | 1.4768143491835443e-6 | 5.02116878722405e-5 | 3.3811275889202196e-05 | CHMP2B/CHMP4C/KIF3A/HAUS5/HAUS4 | 5 |
| CC | GO:0000793 | condensed chromosome | 7/48 | 281/19886 | 4.6830633346429195e-6 | 1.1649157617925916e-4 | 7.844247002782931e-5 | CHMP2B/CHMP4C/NDEL1/RAD50/SYCP2/SMC2/CCNB1IP1 | 7 |
| CC | GO:0072686 | mitotic spindle | 6/48 | 184/19886 | 5.13933424320261e-6 | 1.1649157617925916e-4 | 7.844247002782931e-5 | KAT2A/CDK5RAP2/WDR62/HAUS5/HAUS4/HEPACAM2 | 6 |
| CC | GO:0005874 | microtubule | 8/48 | 467/19886 | 1.4410763267821713e-5 | 2.7998054348910755e-4 | 1.8853179012037427e-4 | CHMP2B/CDK5RAP2/CHMP4C/KIF3A/HAUS5/HAUS4/NDEL1/TUBGCP5 | 8 |
| CC | GO:0000794 | condensed nuclear chromosome | 4/48 | 81/19886 | 4.3366388398594405e-5 | 6.79867962065532e-4 | 4.578058258490811e-4 | RAD50/SYCP2/SMC2/CCNB1IP1 | 4 |
| CC | GO:0098687 | chromosomal region | 7/48 | 399/19886 | 4.499126219551315e-5 | 6.79867962065532e-4 | 4.578058258490811e-4 | CHMP2B/NAT10/CHMP4C/NDEL1/ERCC4/RAD50/RAD51AP1 | 7 |
| CC | GO:0000228 | nuclear chromosome | 5/48 | 228/19886 | 2.172955584478297e-4 | 0.002955219594890484 | 0.0019899698510485457 | RAD50/SYCP2/SMC2/CCNB1IP1/FIGNL1 | 5 |
| CC | GO:0000815 | ESCRT III complex | 2/48 | 11/19886 | 3.0945651569322076e-4 | 0.003826007830388911 | 0.002576336542134948 | CHMP2B/CHMP4C | 2 |
| CC | GO:1904930 | amphisome membrane | 2/48 | 12/19886 | 3.707758999048369e-4 | 0.004202126865588152 | 0.002829605551905334 | CHMP2B/CHMP4C | 2 |
| CC | GO:0044753 | amphisome | 2/48 | 14/19886 | 5.096482172972597e-4 | 0.0049145196597281515 | 0.003309312773965551 | CHMP2B/CHMP4C | 2 |
| CC | GO:1990498 | mitotic spindle microtubule | 2/48 | 14/19886 | 5.096482172972597e-4 | 0.0049145196597281515 | 0.003309312773965551 | HAUS5/HAUS4 | 2 |
| CC | GO:0005875 | microtubule associated complex | 4/48 | 156/19886 | 5.420426095288402e-4 | 0.0049145196597281515 | 0.003309312773965551 | KIF3A/HAUS5/HAUS4/NDEL1 | 4 |
| CC | GO:0000781 | "chromosome telomeric region" | 4/48 | 171/19886 | 7.647635172299e-4 | 0.0065004898964541495 | 0.004377264868355348 | NAT10/ERCC4/RAD50/RAD51AP1 | 4 |
| CC | GO:0005828 | kinetochore microtubule | 2/48 | 21/19886 | 0.0011635020757752273 | 0.009308016606201818 | 0.0062677820800275405 | CHMP2B/CHMP4C | 2 |
| CC | GO:0030496 | midbody | 4/48 | 204/19886 | 0.001470043809197262 | 0.011106997669490424 | 0.007479170257319403 | CHMP2B/NAT10/CHMP4C/HEPACAM2 | 4 |
| CC | GO:0005643 | nuclear pore | 3/48 | 97/19886 | 0.001659676801176489 | 0.011879791840000133 | 0.007999550232817426 | CHMP2B/CHMP4C/NDC1 | 3 |
| CC | GO:0036452 | ESCRT complex | 2/48 | 28/19886 | 0.0020718751428614917 | 0.014088750971458144 | 0.00948700723310262 | CHMP2B/CHMP4C | 2 |
| CC | GO:0032585 | multivesicular body membrane | 2/48 | 29/19886 | 0.002221929238333754 | 0.014389636972066217 | 0.00968961622732013 | CHMP2B/CHMP4C | 2 |
| CC | GO:0000795 | synaptonemal complex | 2/48 | 40/19886 | 0.004197225498206874 | 0.024818376858962383 | 0.01671206491276879 | SYCP2/CCNB1IP1 | 2 |
| CC | GO:0099086 | synaptonemal structure | 2/48 | 40/19886 | 0.004197225498206874 | 0.024818376858962383 | 0.01671206491276879 | SYCP2/CCNB1IP1 | 2 |
| CC | GO:0005871 | kinesin complex | 2/48 | 47/19886 | 0.005754815739675444 | 0.03261062252482752 | 0.02195916532244577 | KIF3A/NDEL1 | 2 |
| CC | GO:0000421 | autophagosome membrane | 2/48 | 52/19886 | 0.007005231312544141 | 0.03810845834024013 | 0.025661268387003805 | CHMP2B/CHMP4C | 2 |
| CC | GO:0000776 | kinetochore | 3/48 | 171/19886 | 0.008138458754509206 | 0.04165153117791287 | 0.028047083687913466 | CHMP2B/CHMP4C/NDEL1 | 3 |
| CC | GO:0036064 | ciliary basal body | 3/48 | 172/19886 | 0.008269053983850349 | 0.04165153117791287 | 0.028047083687913466 | RTTN/POC1B/CEP250 | 3 |
| CC | GO:0000779 | "condensed chromosome centromeric region" | 3/48 | 182/19886 | 0.009643338478912113 | 0.04683907261185883 | 0.03154024239343435 | CHMP2B/CHMP4C/NDEL1 | 3 |
| CC | GO:1904115 | axon cytoplasm | 2/48 | 63/19886 | 0.010145460097248859 | 0.04757870942158085 | 0.03203829504394377 | KIF3A/NDEL1 | 2 |
| MF | GO:0004520 | DNA endonuclease activity | 4/48 | 40/18496 | 3.406173387099834e-6 | 5.613890978417862e-4 | 4.3748845077522166e-4 | GEN1/ERCC4/RAD51C/RAD50 | 4 |
| MF | GO:0008017 | microtubule binding | 7/48 | 273/18496 | 6.203194451290456e-6 | 5.613890978417862e-4 | 4.3748845077522166e-4 | ALMS1/CDK5RAP2/FES/KIF3A/HAUS4/NDEL1/TUBGCP5 | 7 |
| MF | GO:0003697 | single-stranded DNA binding | 5/48 | 118/18496 | 1.3347988444750279e-5 | 6.765156458955605e-4 | 5.272061445187852e-4 | ERCC4/RAD54L/RAD50/SMC2/RAD51AP1 | 5 |
| MF | GO:0004519 | endonuclease activity | 5/48 | 125/18496 | 1.765142557182498e-5 | 6.765156458955605e-4 | 5.272061445187852e-4 | GEN1/ERCC4/RAD51C/RAD50/AGO4 | 5 |
| MF | GO:0004536 | DNA nuclease activity | 4/48 | 61/18496 | 1.8688277510927085e-5 | 6.765156458955605e-4 | 5.272061445187852e-4 | GEN1/ERCC4/RAD51C/RAD50 | 4 |
| MF | GO:0015631 | tubulin binding | 7/48 | 379/18496 | 5.123777804965443e-5 | 0.0015456729711645755 | 0.0012045372383602973 | ALMS1/CDK5RAP2/FES/KIF3A/HAUS4/NDEL1/TUBGCP5 | 7 |
| MF | GO:0000217 | DNA secondary structure binding | 3/48 | 39/18496 | 1.4038247851697307e-4 | 0.003629889801653161 | 0.002828759717484871 | GEN1/RAD51C/RAD51AP1 | 3 |
| MF | GO:0004518 | nuclease activity | 5/48 | 208/18496 | 1.9810409449207405e-4 | 0.0044821051378831755 | 0.0034928879818339376 | GEN1/ERCC4/RAD51C/RAD50/AGO4 | 5 |
| MF | GO:0000014 | single-stranded DNA endodeoxyribonuclease activity | 2/48 | 10/18496 | 2.9285786569583445e-4 | 0.005300727369094604 | 0.004130837263499139 | ERCC4/RAD50 | 2 |
| MF | GO:0016889 | "DNA endonuclease activity producing 3'-phosphomonoesters" | 2/48 | 10/18496 | 2.9285786569583445e-4 | 0.005300727369094604 | 0.004130837263499139 | GEN1/RAD51C | 2 |
| MF | GO:0140097 | "catalytic activity acting on DNA" | 5/48 | 248/18496 | 4.4529354850082845e-4 | 0.007327102934422722 | 0.005709984258288135 | GEN1/ERCC4/RAD51C/RAD54L/RAD50 | 5 |
| MF | GO:0051011 | microtubule minus-end binding | 2/48 | 13/18496 | 5.051030791461224e-4 | 0.007618638110454013 | 0.005937176544349159 | HAUS4/TUBGCP5 | 2 |
| MF | GO:0016887 | ATP hydrolysis activity | 6/48 | 412/18496 | 6.552215855763494e-4 | 0.008651983773822513 | 0.006742459003734905 | KIF3A/RAD54L/RAD50/SMC2/FIGNL1/TDRD9 | 6 |
| MF | GO:1990841 | promoter-specific chromatin binding | 3/48 | 66/18496 | 6.692142145498076e-4 | 0.008651983773822513 | 0.006742459003734905 | GADD45A/ERCC4/EHMT2 | 3 |
| MF | GO:0000400 | four-way junction DNA binding | 2/48 | 18/18496 | 9.826095813589859e-4 | 0.011115770889123527 | 0.008662479204085796 | GEN1/RAD51C | 2 |
| MF | GO:0016894 | "endonuclease activity active with either ribo- or deoxyribonucleic acids and producing 3'-phosphomonoesters" | 2/48 | 18/18496 | 9.826095813589859e-4 | 0.011115770889123527 | 0.008662479204085796 | GEN1/RAD51C | 2 |
| MF | GO:0043015 | gamma-tubulin binding | 2/48 | 35/18496 | 0.0037153818167499075 | 0.03922515198285947 | 0.03056801608434527 | CDK5RAP2/TUBGCP5 | 2 |
| MF | GO:0008094 | "ATP-dependent activity acting on DNA" | 3/48 | 122/18496 | 0.003900843843599284 | 0.03922515198285947 | 0.03056801608434527 | RAD51C/RAD54L/RAD50 | 3 |

Table S4: Gene Set Enrichment Analysis (GSEA) results for key genes (GADD45A, LFNG and DUSP13).

Table S4-1GADD45A

|  | **ID** | **Description** | **setSize** | **enrichmentScore** | **NES** | **pvalue** | **p.adjust** | **qvalue** | **rank** | **leading_edge** | **core_enrichment** |
| --- | --- | --- | --- | --- | --- | --- | --- | --- | --- | --- | --- |
| KEGG_FC_GAMMA_R_MEDIATED_PHAGOCYTOSIS | KEGG_FC_GAMMA_R_MEDIATED_PHAGOCYTOSIS | KEGG_FC_GAMMA_R_MEDIATED_PHAGOCYTOSIS | 90 | 0.609066823004923 | 1.95453808264697 | 3.1623761601695e-10 | 5.6922770883051e-08 | 3.06251164984835e-08 | 2684 | tags=51%, list=17%, signal=43% | MYO10/HCK/MARCKS/LIMK2/VASP/PIK3CB/AMPH/MAPK3/ASAP1/CFL1/FCGR2A/WASF2/PRKCD/ARPC1B/RAC2/ARPC5/ARPC3/VAV3/LYN/ARPC2/FCGR1A/DNM2/CDC42/PLD1/GSN/ARPC4/MAPK1/PLA2G4A/PIK3CG/VAV1/SYK/PTPRC/GAB2/PIK3CD/WAS/ARPC1A/RAC1/PIP5K1A/PLCG2/SPHK1/PIP5K1B/CRK/MAP2K1/PRKCB/PIK3CA/DOCK2 |
| KEGG_REGULATION_OF_ACTIN_CYTOSKELETON | KEGG_REGULATION_OF_ACTIN_CYTOSKELETON | KEGG_REGULATION_OF_ACTIN_CYTOSKELETON | 192 | 0.499558897006908 | 1.67259674746868 | 6.39418684922893e-09 | 5.75476816430603e-07 | 3.09613257962664e-07 | 3982 | tags=46%, list=25%, signal=35% | ITGAM/MYLK3/SSH1/ITGA7/LIMK2/MYL12A/ACTB/PIK3CB/MAPK3/SOS2/CFL1/ACTN1/PPP1CB/WASF2/IQGAP1/FGF13/ARPC1B/PXN/RAC2/CD14/ARPC5/RHOA/ARPC3/ITGAX/VAV3/ARPC2/PPP1R12A/CDC42/ACTG1/MYL12B/ROCK1/MYH9/GSN/ARPC4/PDGFC/MAPK1/ITGB2/PIK3CG/VCL/SLC9A1/VAV1/SSH2/KRAS/FGD3/SSH3/PIK3CD/MSN/DIAPH1/WAS/BRAF/ARPC1A/RAC1/PIP5K1A/NCKAP1L/GNA13/PFN1/PIP5K1B/ARAF/PAK2/CRK/MAP2K2/CHRM5/MAP2K1/PIK3CA/ITGA1/CSK/FGF11/FN1/ITGB6/BDKRB2/ITGA9/APC/WASF1/PIKFYVE/NRAS/RAF1/ROCK2/ACTN4/CRKL/BRK1/ARHGEF1/CHRM4/FGF23/PIK3R5/MYH10/EGFR/PPP1CA/IQGAP2 |
| KEGG_PATHOGENIC_ESCHERICHIA_COLI_INFECTION | KEGG_PATHOGENIC_ESCHERICHIA_COLI_INFECTION | KEGG_PATHOGENIC_ESCHERICHIA_COLI_INFECTION | 54 | 0.636007839796016 | 1.95206173831765 | 3.00385108133938e-07 | 1.76776710030187e-05 | 9.51079375601005e-06 | 2105 | tags=44%, list=13%, signal=39% | TLR5/TUBA4A/TUBA1A/TLR4/ACTB/HCLS1/ARPC1B/CD14/ARPC5/RHOA/ARPC3/ARPC2/YWHAZ/LY96/TUBB4B/CDC42/ACTG1/TUBA1C/ROCK1/ARPC4/WAS/ARPC1A/CTNNB1/TUBA1B |
| KEGG_LEUKOCYTE_TRANSENDOTHELIAL_MIGRATION | KEGG_LEUKOCYTE_TRANSENDOTHELIAL_MIGRATION | KEGG_LEUKOCYTE_TRANSENDOTHELIAL_MIGRATION | 107 | 0.535202661806609 | 1.73546462582684 | 4.06589783506269e-07 | 1.76776710030187e-05 | 9.51079375601005e-06 | 2903 | tags=40%, list=18%, signal=33% | MMP9/ITGAM/MAPK14/NCF4/MYL12A/VASP/ACTB/PIK3CB/ACTN1/CYBA/GNAI3/PXN/CTNNA1/RAC2/RHOA/VAV3/CDC42/ACTG1/CDH5/MYL12B/NCF2/ROCK1/ITGB2/PIK3CG/VCL/PTK2B/GNAI2/VAV1/SIPA1/PIK3CD/MSN/CTNNB1/RAC1/PLCG2/RAP1A/CLDN10/CLDN11/MAPK13/PRKCB/PIK3CA/RAP1B/RASSF5/CYBB |
| KEGG_INSULIN_SIGNALING_PATHWAY | KEGG_INSULIN_SIGNALING_PATHWAY | KEGG_INSULIN_SIGNALING_PATHWAY | 129 | 0.519364678384461 | 1.70962362950205 | 4.91046416750519e-07 | 1.76776710030187e-05 | 9.51079375601005e-06 | 4218 | tags=51%, list=27%, signal=38% | HK3/MKNK1/FLOT1/PYGL/FLOT2/SOCS3/PPP1R3D/IRS2/HK2/PIK3CB/MAPK3/SOS2/PPP1R3B/PPP1CB/PRKAR2A/PHKA2/MAPK10/PRKACA/SH2B2/PRKAR1A/MAPK1/PIK3CG/HK1/PTPN1/KRAS/GRB2/PIK3CD/BRAF/CBL/EIF4E1B/GYS1/INSR/ARAF/EXOC7/CRK/MAP2K2/PRKAA1/GSK3B/CALM2/MKNK2/MAP2K1/PRKAB1/PIK3CA/PPARGC1A/PDPK1/PRKAG1/PYGM/FBP1/NRAS/RAF1/INPP5K/PPP1R3C/CRKL/SHC1/CALM1/PIK3R5/PPP1CA/PDE3B/RHEB/CALML3/RAPGEF1/INPP5D/AKT2/PHKB/BAD/PCK1 |
| KEGG_ENDOCYTOSIS | KEGG_ENDOCYTOSIS | KEGG_ENDOCYTOSIS | 174 | 0.481701080799353 | 1.60536276465723 | 6.25801184950357e-07 | 1.87740355485107e-05 | 1.01006507044619e-05 | 5071 | tags=56%, list=32%, signal=38% | NEDD4/SH3GLB1/HSPA1A/HSPA1B/GRK6/RAB31/ARRB2/ARFGAP3/ACAP1/ASAP1/IGF1R/SMAP2/CHMP2B/CHMP2A/RAB5A/CHMP4B/CXCR1/TSG101/EHD1/IQSEC1/CLTC/DNM2/CDC42/VPS37B/PLD1/DAB2/CHMP4C/AGAP2/RAB11A/AP2A1/VPS25/SH3GL1/CHMP3/EPN1/RAB5B/AP2M1/CXCR2/CBL/RAB5C/PIP5K1A/CLTCL1/PIP5K1B/EPS15/HSPA1L/ACAP2/PDCD6IP/STAM2/VTA1/ITCH/GIT2/RAB11B/ARAP1/CLTB/HSPA6/HSPA2/CHMP6/LDLR/USP8/VPS28/AP2B1/RNF41/CHMP1B/STAM/SH3KBP1/PIKFYVE/HGS/HLA-C/VPS4B/HLA-E/SMURF1/TFRC/VPS37A/RBSN/ARAP2/ADRB3/SNF8/SMAP1/TRAF6/EGFR/EPN2/VPS37C/AP2A2/RUFY1/EHD4/RAB11FIP1/CHMP5/SMURF2/RAB22A/STAMBP/ARFGAP1/EEA1/ARFGAP2/RAB11FIP2/IL2RG/HLA-B/HLA-F/MDM2 |
| KEGG_NOD_LIKE_RECEPTOR_SIGNALING_PATHWAY | KEGG_NOD_LIKE_RECEPTOR_SIGNALING_PATHWAY | KEGG_NOD_LIKE_RECEPTOR_SIGNALING_PATHWAY | 59 | 0.581604428867994 | 1.81499732773323 | 4.20989213335274e-06 | 0.000108254369143356 | 5.82421167320981e-05 | 4730 | tags=63%, list=30%, signal=44% | NLRC4/NAIP/MAPK14/CARD6/MAPK3/NLRP3/CASP5/NFKBIA/MAPK10/MAPK1/CHUK/NFKB1/IKBKG/MEFV/PSTPIP1/TAB3/MAPK13/BIRC2/CARD8/PYCARD/TRIP6/TAB2/CXCL1/NOD2/IL18/CARD18/XIAP/CASP8/HSP90AA1/CASP1/TNFAIP3/TRAF6/HSP90B1/MAP3K7/RELA/IL1B/NFKBIB |
| KEGG_TOLL_LIKE_RECEPTOR_SIGNALING_PATHWAY | KEGG_TOLL_LIKE_RECEPTOR_SIGNALING_PATHWAY | KEGG_TOLL_LIKE_RECEPTOR_SIGNALING_PATHWAY | 91 | 0.534716901204021 | 1.71779232892812 | 5.05728610165218e-06 | 0.000113788937287174 | 6.12197791252632e-05 | 2574 | tags=41%, list=16%, signal=34% | TLR5/MAPK14/MAP2K6/MAP2K3/TLR4/TLR8/TLR2/PIK3CB/MAPK3/TOLLIP/IFNAR1/TLR1/MYD88/CD14/SPP1/NFKBIA/LY96/MAPK10/IRAK4/FADD/MAPK1/CHUK/NFKB1/PIK3CG/TLR6/IKBKG/MAP3K8/PIK3CD/RAC1/TIRAP/FOS/MAPK13/MAP2K2/MAP2K1/TAB2/IFNAR2/PIK3CA |
| KEGG_LYSOSOME | KEGG_LYSOSOME | KEGG_LYSOSOME | 118 | 0.508904538108007 | 1.66434480799574 | 5.92230606707678e-06 | 0.000118446121341536 | 6.37253986164987e-05 | 5275 | tags=61%, list=33%, signal=41% | SORT1/AP3B2/CD63/SLC11A1/SUMF1/GBA/MCOLN1/CTSD/ATP6V0D1/GNS/ATP6V0C/CTSB/LAMP1/ATP6AP1/CLTC/LAPTM4A/AP3S1/AP3S2/GM2A/CTSL/GLA/ATP6V0B/GALNS/GAA/LAPTM5/ATP6V0A1/ASAH1/TCIRG1/ABCA2/ATP6V1H/AP1M1/CTSA/CLTCL1/IGF2R/CD164/AP1G1/IDS/CLTB/ARSG/CTSH/LAMP2/GALC/SLC17A5/AP3B1/AGA/SGSH/NEU1/CLN3/CTSZ/GGA3/PSAP/ENTPD4/TPP1/HGSNAT/AP3D1/GLB1/PLA2G15/PPT1/ARSA/LIPA/GGA1/NAGA/GUSB/HEXB/CD68/CTSK/ARSB/FUCA1/AP4B1/SCARB2/AP1B1/CLTA |
| KEGG_EPITHELIAL_CELL_SIGNALING_IN_HELICOBACTER_PYLORI_INFECTION | KEGG_EPITHELIAL_CELL_SIGNALING_IN_HELICOBACTER_PYLORI_INFECTION | KEGG_EPITHELIAL_CELL_SIGNALING_IN_HELICOBACTER_PYLORI_INFECTION | 63 | 0.571230039609165 | 1.78632436694845 | 7.91682989504793e-06 | 0.000140104247990072 | 7.53777240648338e-05 | 2705 | tags=49%, list=17%, signal=41% | MAPK14/ATP6V1C1/ATP6V0D1/ATP6V0C/ATP6V0E1/LYN/NFKBIA/CXCR1/ATP6AP1/CDC42/MAPK10/ADAM17/HBEGF/CHUK/NFKB1/ATP6V0B/IKBKG/ATP6V1D/ATP6V1E1/ATP6V0A1/CXCR2/TCIRG1/RAC1/ATP6V1H/PLCG2/MAPK13/ADAM10/ATP6V1A/CXCL1/ATP6V1B1/CSK |
| KEGG_NEUROTROPHIN_SIGNALING_PATHWAY | KEGG_NEUROTROPHIN_SIGNALING_PATHWAY | KEGG_NEUROTROPHIN_SIGNALING_PATHWAY | 123 | 0.504604165527161 | 1.65535052768506 | 8.56192626605993e-06 | 0.000140104247990072 | 7.53777240648338e-05 | 4609 | tags=57%, list=29%, signal=41% | MAPK14/IRAK3/SORT1/IRS2/PIK3CB/MAPK3/SOS2/PRKCD/RPS6KA1/MAPKAPK2/RHOA/NFKBIA/ARHGDIB/RPS6KA3/YWHAZ/CDC42/MAP3K3/MAPK10/YWHAH/IRAK4/KIDINS220/SH2B2/MAPK1/PSEN1/NFKB1/PIK3CG/KRAS/GRB2/PIK3CD/FOXO3/BRAF/RAC1/RPS6KA2/MAP3K5/MAP3K1/PLCG2/RAP1A/YWHAB/YWHAG/YWHAE/MAPK13/CRK/MAP2K2/GSK3B/CALM2/MAP2K1/PIK3CA/PDPK1/ARHGDIA/CSK/RAP1B/MAPK7/NRAS/RAF1/CRKL/SHC1/CALM1/TRAF6/PIK3R5/ATF4/CAMK2G/CALML3/RAPGEF1/AKT2/BAD/JUN/PRDM4/GAB1/RELA/CAMK2B |
| KEGG_B_CELL_RECEPTOR_SIGNALING_PATHWAY | KEGG_B_CELL_RECEPTOR_SIGNALING_PATHWAY | KEGG_B_CELL_RECEPTOR_SIGNALING_PATHWAY | 74 | 0.544972154338011 | 1.72399245896353 | 1.39078160152681e-05 | 0.000208617240229022 | 0.000112238515210936 | 2624 | tags=47%, list=17%, signal=40% | LILRB3/PIK3CB/MAPK3/CHP1/SOS2/RAC2/VAV3/PIK3AP1/LYN/NFKBIA/PPP3R1/MAPK1/CHUK/PPP3CB/NFKB1/PIK3CG/IFITM1/IKBKG/VAV1/SYK/KRAS/GRB2/PIK3CD/PTPN6/RAC1/PLCG2/FOS/MAP2K2/PPP3CA/GSK3B/MAP2K1/BCL10/PRKCB/PIK3CA/BTK |
| KEGG_GRAFT_VERSUS_HOST_DISEASE | KEGG_GRAFT_VERSUS_HOST_DISEASE | KEGG_GRAFT_VERSUS_HOST_DISEASE | 36 | -0.508843558 | -2.261035758 | 2.26166545526961e-05 | 0.000303153828922357 | 0.000163100305619046 | 3636 | tags=61%, list=23%, signal=47% | CD86/KIR3DL1/KIR2DL3/HLA-DRA/KLRD1/HLA-DMA/HLA-DOB/HLA-DRB5/HLA-DPA1/HLA-DOA/HLA-DMB/HLA-G/HLA-DPB1/HLA-DRB1/GZMB/IFNG/PRF1/FASLG/KLRC1/HLA-DQA1/HLA-DQB1/CD28 |
| KEGG_PRIMARY_IMMUNODEFICIENCY | KEGG_PRIMARY_IMMUNODEFICIENCY | KEGG_PRIMARY_IMMUNODEFICIENCY | 34 | -0.510451366 | -2.256674426 | 2.52628190768631e-05 | 0.000303153828922357 | 0.000163100305619046 | 3251 | tags=68%, list=21%, signal=54% | TNFRSF13C/BLNK/CD19/AICDA/TNFRSF13B/CD40/RAG1/CIITA/RFX5/CD79A/AIRE/ADA/ZAP70/CD4/UNG/CD8A/ICOS/IL7R/CD8B/LCK/CD3E/CD40LG/CD3D |
| KEGG_ALZHEIMERS_DISEASE | KEGG_ALZHEIMERS_DISEASE | KEGG_ALZHEIMERS_DISEASE | 145 | 0.480205225019917 | 1.58443279125809 | 2.44833773083787e-05 | 0.000303153828922357 | 0.000163100305619046 | 5552 | tags=52%, list=35%, signal=34% | GAPDH/GNAQ/CAPN1/MAPK3/CHP1/COX6B2/ATF6/NDUFB3/SDHC/PPP3R1/ADAM17/NCSTN/TNFRSF1A/FADD/MAPK1/PPP3CB/APAF1/PSEN1/NDUFA1/APP/COX7A2L/CDK5R1/PSENEN/PPP3CA/GSK3B/CALM2/ADAM10/UQCRC1/COX7B/SDHB/UQCRFS1/CASP9/NDUFV2/NDUFB9/COX7A2/NDUFB1/LPL/COX8A/NDUFS2/COX8C/UQCR11/CASP8/COX6B1/CALM1/NDUFC2/ATP2A3/NDUFC1/COX6A1/UQCR10/SDHD/ATP2A2/CALML3/APH1A/COX5B/BAD/ITPR2/NDUFS1/LRP1/CDK5/NDUFA2/PLCB3/ERN1/IL1B/NDUFA7/NDUFA4/PLCB2/CACNA1D/CASP3/BID/NDUFB4/FAS/UQCRC2/CYC1/GRIN2D/NDUFS5/NDUFB8 |
| KEGG_CHEMOKINE_SIGNALING_PATHWAY | KEGG_CHEMOKINE_SIGNALING_PATHWAY | KEGG_CHEMOKINE_SIGNALING_PATHWAY | 174 | 0.453156729593585 | 1.51023314923059 | 3.22726748699962e-05 | 0.000363067592287457 | 0.00019533461105524 | 2768 | tags=36%, list=18%, signal=30% | GRK6/GNG10/CXCL16/HCK/GNG5/FGR/GNB2/ARRB2/JAK3/STAT5B/PIK3CB/MAPK3/SOS2/PRKCD/GNAI3/JAK2/PXN/RAC2/RHOA/VAV3/LYN/NFKBIA/CXCR1/CDC42/PRKACA/STAT3/ROCK1/GSK3A/MAPK1/PREX1/CHUK/NFKB1/PIK3CG/IKBKG/PTK2B/GNAI2/CCL24/VAV1/KRAS/GRB2/GNB1/PIK3CD/GNG2/FOXO3/WAS/BRAF/CXCR2/RAC1/XCR1/RAP1A/ADCY4/CRK/GSK3B/ADCY3/MAP2K1/PRKCB/CCR1/PIK3CA/CXCL1/DOCK2/CSK/RAP1B |
| KEGG_MAPK_SIGNALING_PATHWAY | KEGG_MAPK_SIGNALING_PATHWAY | KEGG_MAPK_SIGNALING_PATHWAY | 238 | 0.429976105687179 | 1.45264937874744 | 6.8248213701975e-05 | 0.000722628145079735 | 0.000388782393844068 | 3479 | tags=38%, list=22%, signal=30% | GADD45A/IL1R2/MKNK1/MAPK14/MAP2K6/CACNA1E/STK3/HSPA1A/HSPA1B/MAP2K3/IL1R1/RASGRP4/ARRB2/MAPK3/CHP1/SOS2/MAP4K4/RPS6KA1/MAPKAPK2/FGF13/CACNA2D1/RAC2/CD14/SRF/DUSP1/RPS6KA3/TGFBR1/CDC42/MAP3K3/PPP3R1/MAPK10/RASA2/PRKACA/TNFRSF1A/LAMTOR3/MAPK1/CHUK/PPP3CB/PLA2G4A/NFKB1/IKBKG/KRAS/GRB2/MAP3K8/BRAF/RAPGEF2/PPM1B/RAC1/RPS6KA2/MAP3K5/MAP3K1/RAP1A/NF1/PAK2/MAP3K11/HSPA1L/FOS/MAPK13/GADD45B/CRK/MAP2K2/PPP3CA/MAP3K13/MKNK2/DUSP3/TAOK1/TGFB1/DDIT3/MAP2K1/TAB2/NLK/PRKCB/HSPA6/HSPA2/FGF11/RAP1B/MAPK7/MAX/RASA1/RASGRP2/TAOK3/MAP3K6/MAP3K2/PPM1A/MAPK8IP3/NRAS/RAF1/MAP2K4/ATF2/CRKL |
| KEGG_FC_EPSILON_RI_SIGNALING_PATHWAY | KEGG_FC_EPSILON_RI_SIGNALING_PATHWAY | KEGG_FC_EPSILON_RI_SIGNALING_PATHWAY | 70 | 0.532983895540406 | 1.68407889331373 | 7.41681803966593e-05 | 0.000741681803966593 | 0.000399033485175009 | 4182 | tags=56%, list=27%, signal=41% | FCER1G/MAPK14/MAP2K6/MAP2K3/PIK3CB/MAPK3/SOS2/PRKCD/RAC2/VAV3/LYN/MAPK10/MAPK1/PLA2G4A/PIK3CG/VAV1/SYK/KRAS/GRB2/GAB2/PIK3CD/RAC1/PLCG2/MAPK13/MAP2K2/MAP2K1/PRKCB/PIK3CA/PDPK1/BTK/NRAS/RAF1/MAP2K4/LCP2/PIK3R5/IL5/PLA2G12B/INPP5D/AKT2 |
| KEGG_NON_SMALL_CELL_LUNG_CANCER | KEGG_NON_SMALL_CELL_LUNG_CANCER | KEGG_NON_SMALL_CELL_LUNG_CANCER | 53 | 0.555599571277296 | 1.70421038735612 | 7.87403670714018e-05 | 0.000745961372255385 | 0.00040133594296781 | 4199 | tags=62%, list=27%, signal=46% | TGFA/E2F2/PIK3CB/MAPK3/SOS2/E2F3/RXRA/MAPK1/PIK3CG/KRAS/GRB2/RB1/PIK3CD/FOXO3/BRAF/PLCG2/ARAF/MAP2K2/MAP2K1/PRKCB/PIK3CA/PDPK1/RASSF5/CASP9/NRAS/RAF1/STK4/PIK3R5/EGFR/RXRB/AKT2/BAD/PRKCG |
| KEGG_CHRONIC_MYELOID_LEUKEMIA | KEGG_CHRONIC_MYELOID_LEUKEMIA | KEGG_CHRONIC_MYELOID_LEUKEMIA | 72 | 0.520556960279763 | 1.64397327860065 | 0.000115446131209847 | 0.00103901518088863 | 0.000559002319542419 | 4542 | tags=58%, list=29%, signal=42% | E2F2/STAT5B/PIK3CB/MAPK3/SOS2/E2F3/NFKBIA/TGFBR1/MAPK1/CHUK/CTBP2/NFKB1/PIK3CG/IKBKG/KRAS/GRB2/RB1/GAB2/PIK3CD/BRAF/CBL/ARAF/RUNX1/CRK/MAP2K2/TGFB1/MAP2K1/PIK3CA/CDKN1B/STAT5A/NRAS/RAF1/CRKL/SHC1/HDAC2/PIK3R5/TGFBR2/AKT2/BAD/MECOM/SMAD4/RELA |
| KEGG_INTESTINAL_IMMUNE_NETWORK_FOR_IGA_PRODUCTION | KEGG_INTESTINAL_IMMUNE_NETWORK_FOR_IGA_PRODUCTION | KEGG_INTESTINAL_IMMUNE_NETWORK_FOR_IGA_PRODUCTION | 45 | -0.419385205 | -2.050998667 | 0.000142513820182801 | 0.00122154703013829 | 0.000657206589314168 | 3636 | tags=60%, list=23%, signal=46% | CD86/ITGA4/MAP3K14/TNFRSF13C/CCL27/HLA-DRA/AICDA/TNFRSF13B/CD40/HLA-DMA/HLA-DOB/MADCAM1/HLA-DRB5/CCL28/CCR10/HLA-DPA1/HLA-DOA/HLA-DMB/HLA-DPB1/HLA-DRB1/IL4/ITGB7/HLA-DQA1/ICOS/HLA-DQB1/CD28/CD40LG |
| KEGG_ALLOGRAFT_REJECTION | KEGG_ALLOGRAFT_REJECTION | KEGG_ALLOGRAFT_REJECTION | 34 | -0.475592923 | -2.102567373 | 0.000152624969367244 | 0.00124874974936836 | 0.000671841970420405 | 2682 | tags=56%, list=17%, signal=46% | CD40/HLA-DMA/HLA-DOB/HLA-DRB5/HLA-DPA1/HLA-DOA/HLA-DMB/HLA-G/HLA-DPB1/HLA-DRB1/GZMB/IFNG/IL4/PRF1/FASLG/HLA-DQA1/HLA-DQB1/CD28/CD40LG |
| KEGG_HUNTINGTONS_DISEASE | KEGG_HUNTINGTONS_DISEASE | KEGG_HUNTINGTONS_DISEASE | 160 | 0.451177843485035 | 1.49561696723387 | 0.000162110026722544 | 0.00126868716565469 | 0.000682568533568605 | 5701 | tags=49%, list=36%, signal=32% | PPARG/HIP1/GNAQ/COX6B2/NDUFB3/SDHC/CLTC/DCTN4/CREB5/DCTN2/APAF1/AP2A1/NDUFA1/AP2M1/CLTCL1/COX7A2L/RCOR1/SOD2/SP1/EP300/UQCRC1/POLR2J/COX7B/CLTB/SDHB/PPARGC1A/POLR2C/UQCRFS1/CASP9/NDUFV2/NDUFB9/AP2B1/COX7A2/PPID/TBPL1/CREBBP/DCTN1/NDUFB1/COX8A/NDUFS2/COX8C/UQCR11/CASP8/COX6B1/HDAC2/NDUFC2/NDUFC1/COX6A1/UQCR10/SDHD/CREB3L1/COX5B/DNAH2/AP2A2/NDUFS1/NDUFA2/PLCB3/DNAL4/NDUFA7/NDUFA4/PLCB2/POLR2J3/POLR2B/REST/POLR2A/CASP3/NDUFB4/UQCRC2/CLTA/IFT57/CYC1/DLG4/DNAH1/SIN3A/NDUFS5/NRF1/NDUFB8/VDAC3/VDAC2 |
| KEGG_ERBB_SIGNALING_PATHWAY | KEGG_ERBB_SIGNALING_PATHWAY | KEGG_ERBB_SIGNALING_PATHWAY | 83 | 0.49717003239276 | 1.58882501309956 | 0.000175019818246679 | 0.00131264863685009 | 0.000706220319240985 | 4609 | tags=54%, list=29%, signal=39% | TGFA/AREG/STAT5B/PIK3CB/MAPK3/SOS2/MAPK10/MAPK1/HBEGF/PIK3CG/KRAS/GRB2/PIK3CD/BRAF/CBL/PLCG2/ARAF/EREG/PAK2/ABL2/CRK/MAP2K2/GSK3B/MAP2K1/PRKCB/PIK3CA/CDKN1B/STAT5A/NRAS/NCK2/RAF1/MAP2K4/NRG4/CRKL/SHC1/PIK3R5/EGFR/CAMK2G/AKT2/BAD/PRKCG/JUN/GAB1/RPS6KB2/CAMK2B |
| KEGG_AUTOIMMUNE_THYROID_DISEASE | KEGG_AUTOIMMUNE_THYROID_DISEASE | KEGG_AUTOIMMUNE_THYROID_DISEASE | 39 | -0.441540323 | -2.043195237 | 0.000199256850325095 | 0.00143464932234068 | 0.000771858114943526 | 2682 | tags=54%, list=17%, signal=45% | CD40/HLA-DMA/HLA-DOB/IFNA5/HLA-DRB5/CTLA4/HLA-DPA1/TPO/HLA-DOA/HLA-DMB/HLA-G/HLA-DPB1/HLA-DRB1/GZMB/IL4/PRF1/FASLG/HLA-DQA1/HLA-DQB1/CD28/CD40LG |
| KEGG_OXIDATIVE_PHOSPHORYLATION | KEGG_OXIDATIVE_PHOSPHORYLATION | KEGG_OXIDATIVE_PHOSPHORYLATION | 108 | 0.475084555428336 | 1.54139438429628 | 0.000231282532316241 | 0.00160118676218936 | 0.000861457205388428 | 4112 | tags=40%, list=26%, signal=30% | ATP6V1C1/ATP6V0D1/ATP6V0C/COX6B2/NDUFB3/SDHC/ATP6V0E1/ATP6AP1/ATP6V0B/ATP6V1D/ATP6V1E1/ATP6V0A1/NDUFA1/ATP4B/TCIRG1/ATP6V1H/COX7A2L/COX15/PPA2/COX17/UQCRC1/ATP6V1A/COX7B/SDHB/ATP6V1B1/UQCRFS1/NDUFV2/NDUFB9/COX7A2/ATP6V1B2/NDUFB1/COX8A/NDUFS2/COX8C/UQCR11/COX6B1/NDUFC2/NDUFC1/COX6A1/UQCR10/SDHD/ATP6V1F/COX5B |
| KEGG_TYPE_I_DIABETES_MELLITUS | KEGG_TYPE_I_DIABETES_MELLITUS | KEGG_TYPE_I_DIABETES_MELLITUS | 38 | -0.424697535 | -1.929052768 | 0.000360447676339119 | 0.00232704973813595 | 0.00125197997607314 | 1805 | tags=42%, list=11%, signal=37% | HLA-DRB5/HLA-DPA1/HLA-DOA/HLA-DMB/HLA-G/HLA-DPB1/HLA-DRB1/GZMB/GAD1/IFNG/PRF1/FASLG/LTA/HLA-DQA1/HLA-DQB1/CD28 |
| KEGG_VIBRIO_CHOLERAE_INFECTION | KEGG_VIBRIO_CHOLERAE_INFECTION | KEGG_VIBRIO_CHOLERAE_INFECTION | 47 | 0.5529556181922 | 1.67578046024416 | 0.000361985514821148 | 0.00232704973813595 | 0.00125197997607314 | 4199 | tags=62%, list=27%, signal=45% | ATP6V1C1/ACTB/ATP6V0D1/ATP6V0C/ATP6V0E1/ATP6AP1/ACTG1/PRKACA/ARF1/ATP6V0B/ATP6V1D/ATP6V1E1/ATP6V0A1/TCIRG1/ATP6V1H/PLCG2/SEC61A2/ADCY3/ATP6V1A/PRKCB/ATP6V1B1/SEC61B/KDELR3/ATP6V1B2/KDELR2/KCNQ1/ATP6V1F/SEC61G/PRKCG |
| KEGG_FOCAL_ADHESION | KEGG_FOCAL_ADHESION | KEGG_FOCAL_ADHESION | 188 | 0.42477683326413 | 1.41995133072864 | 0.000453413586919724 | 0.00281429122915691 | 0.00151412159697331 | 4259 | tags=40%, list=27%, signal=29% | LAMB3/HGF/MYLK3/ITGA7/ZYX/PTEN/CCND3/MYL12A/VASP/ACTB/PIK3CB/MAPK3/SOS2/IGF1R/ACTN1/PPP1CB/THBS3/PXN/RAC2/SPP1/RHOA/VAV3/PPP1R12A/TLN1/THBS1/CDC42/ACTG1/MAPK10/MYL12B/ROCK1/LAMC2/PDGFC/MAPK1/PIK3CG/VCL/VAV1/LAMC1/ILK/GRB2/PIK3CD/DIAPH1/BRAF/CTNNB1/RAC1/RAP1A/LAMB1/PAK2/CRK/GSK3B/BIRC2/MAP2K1/PRKCB/PIK3CA/PDPK1/ITGA1/FN1/RAP1B/ITGB6/ITGA9/RAF1/ROCK2/ACTN4/CRKL/SHC1/XIAP/PIK3R5/EGFR/PPP1CA/PARVG/RAPGEF1/ITGA5/AKT2/BAD/PRKCG/JUN |
| KEGG_ACUTE_MYELOID_LEUKEMIA | KEGG_ACUTE_MYELOID_LEUKEMIA | KEGG_ACUTE_MYELOID_LEUKEMIA | 57 | 0.524856239369786 | 1.63003693820664 | 0.000474374876290253 | 0.00284624925774152 | 0.00153131539012994 | 4560 | tags=60%, list=29%, signal=43% | CEBPA/SPI1/STAT5B/PIK3CB/MAPK3/SOS2/FLT3/PIM1/RARA/STAT3/MAPK1/CHUK/NFKB1/PIK3CG/CCNA1/IKBKG/KRAS/GRB2/PIK3CD/BRAF/ARAF/RUNX1/MAP2K2/MAP2K1/PIK3CA/STAT5A/NRAS/RAF1/ZBTB16/PIK3R5/AKT2/BAD/RELA/RPS6KB2 |
| KEGG_PANCREATIC_CANCER | KEGG_PANCREATIC_CANCER | KEGG_PANCREATIC_CANCER | 69 | 0.509501401939105 | 1.60835419410132 | 0.000629545683964897 | 0.003593655660182 | 0.00193342877623827 | 4542 | tags=55%, list=29%, signal=39% | TGFA/E2F2/RALB/PIK3CB/MAPK3/E2F3/RAC2/TGFBR1/CDC42/MAPK10/STAT3/PLD1/MAPK1/CHUK/NFKB1/PIK3CG/IKBKG/KRAS/RB1/PIK3CD/BRAF/RAC1/ARAF/TGFB1/MAP2K1/PIK3CA/RALBP1/CASP9/RAF1/SMAD2/PIK3R5/EGFR/TGFBR2/AKT2/BAD/JAK1/SMAD4/RELA |
| KEGG_LEISHMANIA_INFECTION | KEGG_LEISHMANIA_INFECTION | KEGG_LEISHMANIA_INFECTION | 69 | 0.509009881722267 | 1.60680260150663 | 0.000638872117365689 | 0.003593655660182 | 0.00193342877623827 | 2550 | tags=39%, list=16%, signal=33% | CR1/ITGAM/MAPK14/IL10/TLR4/NCF4/IFNGR1/TLR2/MAPK3/IFNGR2/FCGR2A/CYBA/JAK2/MYD88/NFKBIA/FCGR1A/IRAK4/NCF2/MAPK1/ITGB2/NFKB1/PTPN6/FOS/MAPK13/TGFB1/TAB2/PRKCB |
| KEGG_LONG_TERM_POTENTIATION | KEGG_LONG_TERM_POTENTIATION | KEGG_LONG_TERM_POTENTIATION | 62 | 0.511875987379551 | 1.59856337553434 | 0.000934648073704227 | 0.00509808040202306 | 0.00274282688295977 | 4768 | tags=60%, list=30%, signal=42% | GNAQ/MAPK3/CHP1/PPP1CB/RPS6KA1/RPS6KA3/PPP1R12A/PPP3R1/PRKACA/MAPK1/PPP3CB/KRAS/BRAF/RPS6KA2/RAP1A/ARAF/MAP2K2/PPP3CA/CALM2/EP300/MAP2K1/PRKCB/RAP1B/CREBBP/NRAS/RAF1/PPP1R1A/CALM1/ATF4/PPP1CA/CAMK2G/CALML3/PRKCG/ITPR2/PLCB3/CAMK2B/PLCB2 |
| KEGG_DORSO_VENTRAL_AXIS_FORMATION | KEGG_DORSO_VENTRAL_AXIS_FORMATION | KEGG_DORSO_VENTRAL_AXIS_FORMATION | 22 | 0.640426061685355 | 1.73536960585095 | 0.00100193968217256 | 0.00515283265117317 | 0.00277228423337972 | 2848 | tags=50%, list=18%, signal=41% | ETS2/NOTCH3/MAPK3/SOS2/MAPK1/KRAS/GRB2/ETV6/NOTCH2/MAP2K1/NOTCH1 |
| KEGG_PROSTATE_CANCER | KEGG_PROSTATE_CANCER | KEGG_PROSTATE_CANCER | 87 | 0.474365717269831 | 1.52095386731293 | 0.000993781211027786 | 0.00515283265117317 | 0.00277228423337972 | 4196 | tags=51%, list=27%, signal=37% | TGFA/E2F2/PTEN/PIK3CB/MAPK3/SOS2/IGF1R/E2F3/NFKBIA/CREB5/PDGFC/MAPK1/CHUK/NFKB1/PIK3CG/IKBKG/KRAS/GRB2/RB1/PIK3CD/BRAF/CTNNB1/ARAF/MAP2K2/GSK3B/EP300/MAP2K1/PIK3CA/PDPK1/CASP9/CDKN1B/CREBBP/NRAS/RAF1/HSP90AA1/SRD5A2/PIK3R5/CREB3L1/ATF4/EGFR/HSP90B1/AKT2/CDK2/BAD |
| KEGG_TYPE_II_DIABETES_MELLITUS | KEGG_TYPE_II_DIABETES_MELLITUS | KEGG_TYPE_II_DIABETES_MELLITUS | 41 | 0.557606392964749 | 1.66364752941331 | 0.00116856881777542 | 0.00584284408887712 | 0.00314351845717365 | 2024 | tags=37%, list=13%, signal=32% | HK3/SOCS3/CACNA1E/IRS2/HK2/PIK3CB/MAPK3/PRKCD/PKM/MAPK10/MAPK1/PIK3CG/HK1/PIK3CD/INSR |
| KEGG_GALACTOSE_METABOLISM | KEGG_GALACTOSE_METABOLISM | KEGG_GALACTOSE_METABOLISM | 23 | 0.629196666697382 | 1.72074911331522 | 0.0012139213159128 | 0.00590556315849469 | 0.00317726205018428 | 1593 | tags=43%, list=10%, signal=39% | HK3/MGAM/PGM1/PGM2/HK2/GALK1/UGP2/GLA/GAA/HK1 |
| KEGG_AMINO_SUGAR_AND_NUCLEOTIDE_SUGAR_METABOLISM | KEGG_AMINO_SUGAR_AND_NUCLEOTIDE_SUGAR_METABOLISM | KEGG_AMINO_SUGAR_AND_NUCLEOTIDE_SUGAR_METABOLISM | 41 | 0.555260730105264 | 1.65664912288452 | 0.00128445742094586 | 0.00608427199395406 | 0.00327340949382324 | 1593 | tags=32%, list=10%, signal=29% | HK3/CHIT1/PGM1/PGM2/CYB5R3/HK2/CYB5R1/NPL/NANS/GALK1/UGP2/FPGT/HK1 |
| KEGG_RENAL_CELL_CARCINOMA | KEGG_RENAL_CELL_CARCINOMA | KEGG_RENAL_CELL_CARCINOMA | 66 | 0.49924848733142 | 1.57020975868361 | 0.00136180458357187 | 0.00628525192417784 | 0.00338153904692609 | 4259 | tags=55%, list=27%, signal=40% | HGF/TGFA/PIK3CB/MAPK3/EPAS1/SOS2/HIF1A/CDC42/MAPK1/PIK3CG/KRAS/GRB2/PIK3CD/ARNT/BRAF/EGLN2/RAC1/RAP1A/ARAF/PAK2/CRK/MAP2K2/EP300/TGFB1/MAP2K1/EGLN1/PIK3CA/RAP1B/CREBBP/NRAS/RAF1/CRKL/PIK3R5/RAPGEF1/AKT2/JUN |
| KEGG_DNA_REPLICATION | KEGG_DNA_REPLICATION | KEGG_DNA_REPLICATION | 36 | -0.410764265 | -1.82522246 | 0.00150852900229204 | 0.0067346332608039 | 0.00362331146195297 | 3468 | tags=58%, list=22%, signal=46% | RFC5/POLE/RPA1/FEN1/RFC3/PRIM2/RNASEH2A/MCM4/MCM7/MCM5/POLD1/MCM6/POLE2/RNASEH2B/PCNA/MCM2/POLA1/LIG1/POLD2/MCM3/PRIM1 |
| KEGG_GNRH_SIGNALING_PATHWAY | KEGG_GNRH_SIGNALING_PATHWAY | KEGG_GNRH_SIGNALING_PATHWAY | 92 | 0.47346877638659 | 1.52178996712148 | 0.00153399979829422 | 0.0067346332608039 | 0.00362331146195297 | 4259 | tags=45%, list=27%, signal=33% | MAPK14/MAP2K6/MAP2K3/GNAQ/MAPK3/SOS2/PRKCD/CDC42/MAP3K3/MAPK10/PRKACA/PLD1/MAPK1/HBEGF/PLA2G4A/PTK2B/MMP14/KRAS/GRB2/MAP3K1/ADCY4/MAPK13/MAP2K2/CALM2/ADCY3/MAP2K1/PRKCB/MAPK7/MAP3K2/NRAS/RAF1/MAP2K4/CALM1/CGA/ATF4/EGFR/CAMK2G/PLA2G12B/CALML3/ITPR2/JUN |
| KEGG_PROGESTERONE_MEDIATED_OOCYTE_MATURATION | KEGG_PROGESTERONE_MEDIATED_OOCYTE_MATURATION | KEGG_PROGESTERONE_MEDIATED_OOCYTE_MATURATION | 80 | 0.473994689918087 | 1.51327342006521 | 0.00188347951030486 | 0.00807205504416367 | 0.00434286002376057 | 4191 | tags=41%, list=27%, signal=30% | MAPK14/PIK3CB/MAPK3/IGF1R/RPS6KA1/GNAI3/RPS6KA3/MAPK10/PRKACA/MAPK1/PIK3CG/CCNA1/GNAI2/KRAS/MAD2L2/PIK3CD/BRAF/RPS6KA2/ARAF/ADCY4/MAPK13/ADCY3/MAP2K1/PIK3CA/FZR1/CDC26/RAF1/HSP90AA1/PIK3R5/PDE3B/CDC27/AKT2/CDK2 |
| KEGG_SNARE_INTERACTIONS_IN_VESICULAR_TRANSPORT | KEGG_SNARE_INTERACTIONS_IN_VESICULAR_TRANSPORT | KEGG_SNARE_INTERACTIONS_IN_VESICULAR_TRANSPORT | 38 | 0.549334320444268 | 1.62915305459594 | 0.00197914831082828 | 0.00828480688253698 | 0.00445732300113101 | 3678 | tags=47%, list=23%, signal=36% | VAMP3/STX3/STX11/SEC22B/SNAP23/STX19/STX7/STX12/VAMP7/STX16/STX5/STX4/VTI1B/VTI1A/SNAP29/STX6/YKT6/STX1A |
| KEGG_ASTHMA | KEGG_ASTHMA | KEGG_ASTHMA | 24 | -0.49284898 | -2.004151822 | 0.00236933558995688 | 0.0093089628861132 | 0.0050083309094878 | 2682 | tags=67%, list=17%, signal=55% | CD40/HLA-DMA/HLA-DOB/EPX/HLA-DRB5/HLA-DPA1/HLA-DOA/HLA-DMB/HLA-DPB1/HLA-DRB1/IL4/MS4A2/HLA-DQA1/HLA-DQB1/CD40LG/FCER1A |
| KEGG_VEGF_SIGNALING_PATHWAY | KEGG_VEGF_SIGNALING_PATHWAY | KEGG_VEGF_SIGNALING_PATHWAY | 68 | 0.485093643846557 | 1.53138069275437 | 0.00228171031493411 | 0.0093089628861132 | 0.0050083309094878 | 4199 | tags=49%, list=27%, signal=36% | MAPK14/PIK3CB/MAPK3/CHP1/MAPKAPK2/PXN/RAC2/CDC42/PPP3R1/MAPK1/PPP3CB/PLA2G4A/PIK3CG/KRAS/PIK3CD/RAC1/PLCG2/SPHK1/MAPK13/MAP2K2/PPP3CA/MAP2K1/PRKCB/PIK3CA/CASP9/NRAS/RAF1/PIK3R5/NFAT5/PLA2G12B/AKT2/BAD/PRKCG |
| KEGG_SPLICEOSOME | KEGG_SPLICEOSOME | KEGG_SPLICEOSOME | 125 | 0.436020606425955 | 1.4317126964514 | 0.00243067364248511 | 0.0093089628861132 | 0.0050083309094878 | 5910 | tags=56%, list=38%, signal=35% | HSPA1A/HSPA1B/ZMAT2/U2AF1/PCBP1/SF3B6/ISY1/SNRNP27/LSM6/SRSF9/SART1/HNRNPK/HSPA1L/DDX5/PRPF18/HSPA6/DDX42/HSPA2/SMNDC1/BUD31/CRNKL1/CDC40/SLU7/DDX39B/CDC5L/PRPF38B/SYF2/ACIN1/SNW1/SF3B1/DHX8/RBM22/DHX16/SRSF4/HNRNPU/PRPF38A/HNRNPM/DDX23/SRSF2/SNRPG/SRSF5/SF3B4/SF3A1/SF3B2/RBM17/SNRPB2/RBM8A/HNRNPA3/SRSF1/LSM3/TRA2A/CWC15/PRPF40A/PRPF3/HNRNPC/RBM25/MAGOH/DHX38/DDX46/SNRNP70/EIF4A3/SRSF3/U2SURP/AQR/PRPF4/SNRPB/CTNNBL1/CCDC12/TRA2B/LSM2 |
| KEGG_UBIQUITIN_MEDIATED_PROTEOLYSIS | KEGG_UBIQUITIN_MEDIATED_PROTEOLYSIS | KEGG_UBIQUITIN_MEDIATED_PROTEOLYSIS | 127 | 0.43427034498739 | 1.42905890518795 | 0.00239356484756458 | 0.0093089628861132 | 0.0050083309094878 | 4048 | tags=39%, list=26%, signal=29% | UBE2H/SOCS3/NEDD4/UBE2J1/UBE2F/UBE2R2/UBE2B/UBE2D1/UBE2D3/MGRN1/TRIP12/UBA1/RCHY1/UBE2W/CBL/UBA3/HERC4/MAP3K1/CUL4B/UBE2A/HERC3/CUL3/WWP2/RNF7/UBA6/UBE2M/SKP1/UBE4A/BIRC2/ITCH/PIAS1/UBR5/FZR1/UBE2J2/CDC26/UBE2D2/UBE2K/UBE4B/FBXW11/UBE2G1/UBOX5/UBE2L3/XIAP/UBE3B/SMURF1/PIAS2/BRCA1/TRAF6/KLHL9/CDC27 |
| KEGG_FRUCTOSE_AND_MANNOSE_METABOLISM | KEGG_FRUCTOSE_AND_MANNOSE_METABOLISM | KEGG_FRUCTOSE_AND_MANNOSE_METABOLISM | 31 | 0.56726414076631 | 1.63079617208687 | 0.00251325580701948 | 0.00942470927632304 | 0.00507060382117964 | 1593 | tags=32%, list=10%, signal=29% | PFKFB2/PFKFB3/HK3/ALDOA/PFKFB4/HK2/MTMR6/MTMR1/FPGT/HK1 |
| KEGG_AMYOTROPHIC_LATERAL_SCLEROSIS_ALS | KEGG_AMYOTROPHIC_LATERAL_SCLEROSIS_ALS | KEGG_AMYOTROPHIC_LATERAL_SCLEROSIS_ALS | 47 | 0.513408255657123 | 1.5559287122736 | 0.00278532636782932 | 0.0102318111471281 | 0.00550483406746074 | 2884 | tags=36%, list=18%, signal=30% | MAPK14/MAP2K6/SLC1A2/MAP2K3/CHP1/RAB5A/PPP3R1/TNFRSF1A/TOMM40L/PPP3CB/APAF1/RAC1/MAP3K5/MAPK13/PPP3CA/CAT/CASP9 |
| KEGG_GLYCOSAMINOGLYCAN_BIOSYNTHESIS_HEPARAN_SULFATE | KEGG_GLYCOSAMINOGLYCAN_BIOSYNTHESIS_HEPARAN_SULFATE | KEGG_GLYCOSAMINOGLYCAN_BIOSYNTHESIS_HEPARAN_SULFATE | 22 | 0.616895739178747 | 1.67160922985005 | 0.00287306465590649 | 0.0103430327612634 | 0.00556467259670309 | 1889 | tags=36%, list=12%, signal=32% | EXT1/HS3ST3B1/NDST2/NDST3/HS3ST3A1/HS2ST1/NDST1/EXTL3 |
| KEGG_ADHERENS_JUNCTION | KEGG_ADHERENS_JUNCTION | KEGG_ADHERENS_JUNCTION | 67 | 0.486020707219538 | 1.53206643624047 | 0.0032622610688801 | 0.0113192486124674 | 0.00608988814238011 | 4056 | tags=48%, list=26%, signal=36% | ACTB/MAPK3/IGF1R/ACTN1/WASF2/IQGAP1/CTNNA1/RAC2/RHOA/TGFBR1/CDC42/ACTG1/PTPRJ/MAPK1/VCL/PTPN1/PTPN6/WAS/CTNNB1/RAC1/INSR/EP300/NLK/CREBBP/SNAI1/CSNK2B/WASF1/ACTN4/SMAD2/SNAI2/EGFR/TGFBR2 |
| KEGG_APOPTOSIS | KEGG_APOPTOSIS | KEGG_APOPTOSIS | 84 | 0.464959112911343 | 1.48730834389908 | 0.0032700051547128 | 0.0113192486124674 | 0.00608988814238011 | 1759 | tags=31%, list=11%, signal=28% | IRAK3/IL1RAP/IL1R1/CAPN1/PIK3CB/CHP1/MYD88/CFLAR/TNFRSF10D/PRKAR2A/NFKBIA/TNFRSF10C/PPP3R1/PRKACA/IRAK4/TNFRSF1A/FADD/PRKAR1A/CHUK/PPP3CB/APAF1/NFKB1/PIK3CG/IKBKG/CSF2RB/PIK3CD |
| KEGG_BASAL_CELL_CARCINOMA | KEGG_BASAL_CELL_CARCINOMA | KEGG_BASAL_CELL_CARCINOMA | 52 | -0.325188006 | -1.689443121 | 0.00340521334148742 | 0.0115648754993912 | 0.00622203828037423 | 2132 | tags=33%, list=14%, signal=28% | WNT9A/FZD8/TP53/FZD6/WNT8B/WNT10B/WNT7B/WNT16/WNT1/PTCH1/BMP4/FZD3/WNT10A/WNT7A/AXIN2/LEF1/TCF7 |
| KEGG_PENTOSE_PHOSPHATE_PATHWAY | KEGG_PENTOSE_PHOSPHATE_PATHWAY | KEGG_PENTOSE_PHOSPHATE_PATHWAY | 26 | 0.587456913920619 | 1.64525000814191 | 0.00405836155517428 | 0.0135278718505809 | 0.00727815327633595 | 1661 | tags=35%, list=11%, signal=31% | PGD/PGM1/PGM2/G6PD/ALDOA/TALDO1/H6PD/TKT/DERA |
| KEGG_GLIOMA | KEGG_GLIOMA | KEGG_GLIOMA | 65 | 0.478862962373055 | 1.50427333768861 | 0.00444340683222812 | 0.0145420587236557 | 0.00782379767588493 | 4199 | tags=49%, list=27%, signal=36% | TGFA/E2F2/PTEN/PIK3CB/MAPK3/SOS2/IGF1R/E2F3/MAPK1/PIK3CG/KRAS/GRB2/RB1/PIK3CD/BRAF/PLCG2/ARAF/MAP2K2/CALM2/MAP2K1/PRKCB/PIK3CA/NRAS/RAF1/SHC1/CALM1/PIK3R5/EGFR/CAMK2G/CALML3/AKT2/PRKCG |
| KEGG_ADIPOCYTOKINE_SIGNALING_PATHWAY | KEGG_ADIPOCYTOKINE_SIGNALING_PATHWAY | KEGG_ADIPOCYTOKINE_SIGNALING_PATHWAY | 61 | 0.485001190736264 | 1.51317012217753 | 0.00468561214711871 | 0.0150608961871673 | 0.00810293829952859 | 4730 | tags=51%, list=30%, signal=36% | ACSL1/SOCS3/IRS2/ACSL4/CAMKK2/ACSL3/JAK2/CAMKK1/NFKBIA/MAPK10/RXRA/STAT3/TNFRSF1A/CHUK/NFKB1/IKBKG/PRKAA1/CD36/AGRP/PRKAB1/PPARGC1A/PRKAG1/LEPR/RXRB/AKT2/PCK1/CPT1A/TNFRSF1B/CPT1B/RELA/NFKBIB |
| KEGG_GLYCOLYSIS_GLUCONEOGENESIS | KEGG_GLYCOLYSIS_GLUCONEOGENESIS | KEGG_GLYCOLYSIS_GLUCONEOGENESIS | 55 | 0.499903117541282 | 1.53939763408915 | 0.00487289977824072 | 0.0153881045628654 | 0.00827898023265274 | 2075 | tags=31%, list=13%, signal=27% | HK3/LDHA/PGK1/GAPDH/PGM1/PGM2/ALDOA/ENO1/HK2/ALDH3B1/PKM/LDHAL6B/DLD/HK1/ACSS2/PGAM1/PGAM4 |
| KEGG_STARCH_AND_SUCROSE_METABOLISM | KEGG_STARCH_AND_SUCROSE_METABOLISM | KEGG_STARCH_AND_SUCROSE_METABOLISM | 34 | 0.537014266630746 | 1.56205814016169 | 0.00688030765092118 | 0.0209907691045053 | 0.0112932792842952 | 1961 | tags=38%, list=12%, signal=34% | HK3/PYGL/MGAM/PGM1/GBE1/PGM2/HK2/UGP2/GAA/HK1/AMY2A/GYS1/PGM2L1 |
| KEGG_PATHWAYS_IN_CANCER | KEGG_PATHWAYS_IN_CANCER | KEGG_PATHWAYS_IN_CANCER | 304 | 0.375598428313682 | 1.27708385871567 | 0.0068784529478854 | 0.0209907691045053 | 0.0112932792842952 | 4480 | tags=40%, list=28%, signal=29% | MMP9/LAMB3/HGF/PPARG/TGFA/E2F2/CEBPA/RALB/PTEN/SPI1/STAT5B/PIK3CB/MAPK3/EPAS1/SOS2/CSF3R/IGF1R/E2F3/CSF2RA/FZD5/FGF13/FLT3/CTNNA1/TPM3/RAC2/RHOA/NFKBIA/TGFBR1/HIF1A/CDC42/RARA/MAPK10/RXRA/STAT3/PLD1/FADD/LAMC2/MAPK1/CHUK/CTBP2/NFKB1/PIK3CG/CCNA1/IKBKG/KRAS/LAMC1/GRB2/RB1/PIK3CD/ARNT/BRAF/CBL/EGLN2/CTNNB1/RAC1/DAPK2/PLCG2/LAMB1/ARAF/RUNX1/FOS/CRK/MAP2K2/GSK3B/BIRC2/EP300/DVL3/TGFB1/CDKN2B/MAP2K1/PIAS1/BMP2/PRKCB/EGLN1/PIK3CA/TFG/FGF11/FN1/RASSF5/RALBP1/CASP9/MAX/CDKN1B/CREBBP/MMP1/STAT5A/APC/NRAS/RAF1/CRKL/XIAP/CASP8/SMAD2/ZBTB16/HSP90AA1/HDAC2/STK4/PIAS2/FGF23/TRAF6/PIK3R5/TPR/EGFR/RXRB/WNT9B/FZD2/DAPK3/TGFBR2/HSP90B1/AKT2/CDK2/MITF/BAD/PRKCG/JUN/PIAS4/MSH3/JAK1/WNT11/MECOM/SMAD4 |
| KEGG_ENDOMETRIAL_CANCER | KEGG_ENDOMETRIAL_CANCER | KEGG_ENDOMETRIAL_CANCER | 51 | 0.494912532801193 | 1.51278189065126 | 0.00743589298318184 | 0.0223076789495455 | 0.0120017921833812 | 4196 | tags=55%, list=27%, signal=40% | PTEN/PIK3CB/MAPK3/SOS2/CTNNA1/MAPK1/PIK3CG/KRAS/ILK/GRB2/PIK3CD/FOXO3/BRAF/CTNNB1/ARAF/MAP2K2/GSK3B/MAP2K1/PIK3CA/PDPK1/CASP9/APC/NRAS/RAF1/PIK3R5/EGFR/AKT2/BAD |
| KEGG_MTOR_SIGNALING_PATHWAY | KEGG_MTOR_SIGNALING_PATHWAY | KEGG_MTOR_SIGNALING_PATHWAY | 49 | 0.492218199165133 | 1.50528499096562 | 0.00826012563477567 | 0.0243741412173708 | 0.0131135730526206 | 2610 | tags=37%, list=17%, signal=31% | CAB39/PIK3CB/MAPK3/RPS6KA1/STRADA/RPS6KA3/HIF1A/DDIT4/MAPK1/ULK1/PIK3CG/PIK3CD/BRAF/EIF4E1B/RPS6KA2/PRKAA1/PIK3CA/PDPK1 |
| KEGG_O_GLYCAN_BIOSYNTHESIS | KEGG_O_GLYCAN_BIOSYNTHESIS | KEGG_O_GLYCAN_BIOSYNTHESIS | 27 | 0.563274231801484 | 1.58726745389267 | 0.00857473526875306 | 0.0248943927157347 | 0.0133934744435532 | 2869 | tags=44%, list=18%, signal=36% | GALNT14/GALNT2/B4GALT5/ST3GAL2/C1GALT1C1/GALNT1/GALNT4/GALNT3/GCNT1/C1GALT1/GALNTL6/GALNT7 |
| KEGG_REGULATION_OF_AUTOPHAGY | KEGG_REGULATION_OF_AUTOPHAGY | KEGG_REGULATION_OF_AUTOPHAGY | 22 | 0.587291192618937 | 1.59138946152942 | 0.00974233233010643 | 0.0278352352288755 | 0.0149756821114418 | 4330 | tags=64%, list=27%, signal=46% | GABARAPL2/ATG4D/GABARAP/ULK1/GABARAPL1/ATG3/BECN1/PRKAA1/ATG7/PIK3C3/ATG4B/ATG4A/ATG12/ATG5 |
| KEGG_MELANOMA | KEGG_MELANOMA | KEGG_MELANOMA | 61 | 0.468949711650957 | 1.4630906192143 | 0.0100300080157511 | 0.0282093975442999 | 0.0151769858133076 | 4196 | tags=46%, list=27%, signal=34% | HGF/E2F2/PTEN/PIK3CB/MAPK3/IGF1R/E2F3/FGF13/PDGFC/MAPK1/PIK3CG/KRAS/RB1/PIK3CD/BRAF/ARAF/MAP2K2/MAP2K1/PIK3CA/FGF11/NRAS/RAF1/FGF23/PIK3R5/EGFR/AKT2/MITF/BAD |
| KEGG_VASOPRESSIN_REGULATED_WATER_REABSORPTION | KEGG_VASOPRESSIN_REGULATED_WATER_REABSORPTION | KEGG_VASOPRESSIN_REGULATED_WATER_REABSORPTION | 42 | 0.504654825081857 | 1.51012413315499 | 0.0102610657920302 | 0.0284152591163912 | 0.0152877417468304 | 3881 | tags=48%, list=25%, signal=36% | RAB5A/DYNC2LI1/ARHGDIB/DCTN4/PRKACA/CREB5/DCTN2/RAB11A/RAB5B/RAB5C/STX4/ADCY3/RAB11B/DYNC1LI2/DYNC1I2/ARHGDIA/DCTN1/NSF/CREB3L1/DYNC1LI1 |
| KEGG_PROTEASOME | KEGG_PROTEASOME | KEGG_PROTEASOME | 43 | 0.493579586971192 | 1.48143339547877 | 0.0105743747828877 | 0.0288392039533301 | 0.0155158290275226 | 5994 | tags=72%, list=38%, signal=45% | PSMD4/PSMB3/POMP/PSMC1/PSMC6/PSMD1/PSMD7/PSMD13/PSMA6/PSMA7/PSMD2/PSMB6/PSME3/PSMD12/PSMD6/PSMA1/PSMB7/PSMD11/PSMB4/PSMB1/PSMA2/PSMB5/PSMA3/PSMD8/PSMC5/PSMA4/PSMC2/PSME4/PSMC3/PSMC4/PSMD3 |
| KEGG_SYSTEMIC_LUPUS_ERYTHEMATOSUS | KEGG_SYSTEMIC_LUPUS_ERYTHEMATOSUS | KEGG_SYSTEMIC_LUPUS_ERYTHEMATOSUS | 50 | -0.320502804 | -1.605903188 | 0.0132006438706171 | 0.0354644163688222 | 0.0190802707949219 | 1805 | tags=46%, list=11%, signal=41% | HLA-DRA/FCGR2B/ACTN2/CD40/HLA-DMA/HLA-DOB/HLA-DRB5/HLA-DPA1/C8G/HLA-DOA/HLA-DMB/HLA-DPB1/HLA-DRB1/ELANE/C3/IFNG/C4A/C4B/CTSG/HLA-DQA1/HLA-DQB1/CD28/CD40LG |
| KEGG_NOTCH_SIGNALING_PATHWAY | KEGG_NOTCH_SIGNALING_PATHWAY | KEGG_NOTCH_SIGNALING_PATHWAY | 46 | 0.482788194157133 | 1.45686324239791 | 0.0141035967356581 | 0.0373330501826245 | 0.0200856176421138 | 4088 | tags=48%, list=26%, signal=36% | NOTCH3/MAML3/RBPJ/NUMB/ADAM17/NCSTN/CTBP2/PSEN1/JAG1/PSENEN/KAT2B/NOTCH2/EP300/DVL3/DTX2/NOTCH1/MAML1/CREBBP/SNW1/HDAC2/NUMBL/APH1A |
| KEGG_PARKINSONS_DISEASE | KEGG_PARKINSONS_DISEASE | KEGG_PARKINSONS_DISEASE | 108 | 0.413448865055384 | 1.34141965153016 | 0.015246100786935 | 0.0397724368354825 | 0.0213980361921894 | 5708 | tags=45%, list=36%, signal=29% | UBE2J1/COX6B2/NDUFB3/SDHC/APAF1/UBA1/PINK1/NDUFA1/COX7A2L/UQCRC1/COX7B/SDHB/UBE2J2/UQCRFS1/CASP9/NDUFV2/NDUFB9/COX7A2/PPID/NDUFB1/UBE2G1/COX8A/NDUFS2/COX8C/UBE2L3/UQCR11/COX6B1/NDUFC2/NDUFC1/COX6A1/UQCR10/SDHD/LRRK2/COX5B/NDUFS1/SLC18A2/NDUFA2/NDUFA7/NDUFA4/CASP3/NDUFB4/UQCRC2/PARK7/CYC1/NDUFS5/NDUFB8/VDAC3/VDAC2/HTRA2 |
| KEGG_BASE_EXCISION_REPAIR | KEGG_BASE_EXCISION_REPAIR | KEGG_BASE_EXCISION_REPAIR | 33 | -0.337748445 | -1.49013046 | 0.0173769996157678 | 0.0446837132976885 | 0.0240403603706862 | 3353 | tags=55%, list=21%, signal=43% | POLE/APEX1/NEIL3/FEN1/PARP2/POLD1/POLE2/PARP1/PARP3/MUTYH/PCNA/LIG1/POLD2/NEIL2/POLB/NTHL1/POLL/UNG |

Table S4-2 LFNG

|  | **ID** | **Description** | **setSize** | **enrichmentScore** | **NES** | **pvalue** | **p.adjust** | **qvalue** | **rank** | **leading_edge** | **core_enrichment** |
| --- | --- | --- | --- | --- | --- | --- | --- | --- | --- | --- | --- |
| KEGG_RIBOSOME | KEGG_RIBOSOME | KEGG_RIBOSOME | 86 | 0.667534886190603 | 2.85168662280709 | 1e-10 | 1.73e-08 | 1.43157894736842e-08 | 2038 | tags=73%, list=13%, signal=64% | RPL15/RPL22/RPS23/RPL10A/RPL10/RPL23/RPL35/RPL7A/RPL19/RPL26/RPSA/RPL11/RPS27A/RPL13A/RPL6/RPS16/RPL14/RPL27A/RPS8/RPL18/RPS21/RPS6/RPS19/RPL17/RPL27/RPL5/RPL28/RPS18/RPL24/RPS7/RPS27/RPL3/RPL34/RPLP0/RPS13/RPL37/RPS3/RPS20/RPL37A/RPS3A/RPL23A/RPL29/RPS29/RPS25/RPS4X/RPL4/RPS2/RPS17/RPL39/RPL13/RPL36/RPS24/RPL8/RPS28/RPL7/RPL18A/RPL31/RPL30/RPS15A/FAU/RPL32/RPS27L/RPL35A |
| KEGG_SPLICEOSOME | KEGG_SPLICEOSOME | KEGG_SPLICEOSOME | 125 | 0.422271945055818 | 1.87523759819664 | 1.70037449856381e-08 | 1.47082394125769e-06 | 1.21711016739304e-06 | 7699 | tags=86%, list=49%, signal=44% | PRPF19/SNRPD2/SNRNP40/SNRPC/HSPA8/HNRNPA1/LSM4/SF3A2/SNRPA/THOC3/PUF60/SF3B3/SF3A3/LSM7/SNRPF/PRPF31/NCBP2/RBMX/SF3B5/SNRPD3/PRPF6/PRPF8/CHERP/WBP11/SRSF7/PPIH/SNRNP200/PPIE/PPIL1/U2AF2/TXNL4A/NCBP1/XAB2/EFTUD2/ALYREF/PQBP1/SNRPD1/DHX15/SNRPE/TCERG1/USP39/SRSF10/CTNNBL1/LSM5/PLRG1/SNRPA1/CCDC12/SNRPB/PHF5A/BCAS2/SRSF3/LSM8/SRSF6/THOC2/THOC1/PRPF4/LSM2/DHX38/EIF4A3/MAGOHB/CWC15/AQR/HNRNPM/TRA2B/SNRPB2/DDX23/U2SURP/HNRNPA3/RBM8A/SRSF1/SF3B2/SF3B4/RBM17/MAGOH/PRPF38A/LSM3/DDX46/DHX16/SNW1/PRPF40A/PRPF3/SRSF2/SRSF4/SF3A1/SNRNP70/HNRNPU/RBM22/TRA2A/HNRNPC/DHX8/CDC40/ACIN1/CDC5L/SNRPG/DDX39B/SART1/CRNKL1/DDX42/RBM25/HSPA1L/PRPF40B/BUD31/SYF2/PRPF38B/SRSF9/SMNDC1/SRSF5 |
| KEGG_DNA_REPLICATION | KEGG_DNA_REPLICATION | KEGG_DNA_REPLICATION | 36 | 0.593514371698638 | 2.27523236407996 | 7.32488829446898e-08 | 4.22401891647711e-06 | 3.49538529139572e-06 | 4916 | tags=86%, list=31%, signal=59% | MCM5/PCNA/MCM3/POLE3/MCM7/RPA1/RPA3/POLD1/POLD2/SSBP1/RNASEH2A/POLE/RNASEH1/FEN1/MCM6/RNASEH2C/RFC1/RFC5/LIG1/RNASEH2B/POLE4/PRIM2/RFC3/POLA2/PRIM1/POLA1/RFC4/POLD4/MCM4/MCM2/RPA2 |
| KEGG_PARKINSONS_DISEASE | KEGG_PARKINSONS_DISEASE | KEGG_PARKINSONS_DISEASE | 108 | 0.391567443901023 | 1.71874993856587 | 1.17403822590188e-05 | 0.000507771532702562 | 0.000420182101901725 | 6715 | tags=71%, list=43%, signal=41% | NDUFB2/MT-ND5/MT-ND6/NDUFV1/NDUFS8/NDUFAB1/SLC25A6/SLC25A5/COX6C/NDUFS7/MT-ATP8/MT-CO1/VDAC1/COX7C/NDUFS3/NDUFB5/MT-ND4/COX5A/MT-ND4L/MT-ATP6/NDUFA8/CYCS/UBA7/NDUFB7/MT-CYB/UBE2G2/MT-CO2/NDUFA6/COX4I1/NDUFS6/NDUFB10/SDHA/MT-ND2/NDUFA9/MT-ND1/CYC1/MT-ND3/UQCRQ/NDUFB4/VDAC2/NDUFB8/NDUFS4/MT-CO3/UQCRC2/NDUFA10/NDUFS5/NDUFA3/PARK7/NDUFA5/CASP3/NDUFV3/SLC25A4/NDUFA4/NDUFS1/UBE2L3/NDUFA7/COX6A1/NDUFC2/VDAC3/UQCRB/COX5B/UQCRH/COX8A/NDUFB6/UQCRFS1/NDUFS2/SDHD/UQCR10/HTRA2/NDUFC1/UQCRC1/NDUFV2/NDUFB9/COX7A2/UBE2G1/PPID/UBE2L6 |
| KEGG_BASE_EXCISION_REPAIR | KEGG_BASE_EXCISION_REPAIR | KEGG_BASE_EXCISION_REPAIR | 33 | 0.526795946921019 | 1.99643573445818 | 2.03678301926585e-05 | 0.000587272437221654 | 0.000485969281789747 | 4897 | tags=76%, list=31%, signal=52% | APEX1/PCNA/MPG/POLE3/PARP1/UNG/POLD1/POLD2/MUTYH/POLE/APEX2/LIG3/FEN1/PARP3/LIG1/NTHL1/OGG1/PARP2/POLE4/POLB/XRCC1/SMUG1/POLD4/NEIL2/TDG |
| KEGG_N_GLYCAN_BIOSYNTHESIS | KEGG_N_GLYCAN_BIOSYNTHESIS | KEGG_N_GLYCAN_BIOSYNTHESIS | 46 | 0.474672564760542 | 1.8853516791814 | 1.99864645931883e-05 | 0.000587272437221654 | 0.000485969281789747 | 7183 | tags=85%, list=46%, signal=46% | MGAT2/ALG3/ST6GAL1/DDOST/GANAB/DOLPP1/MAN1C1/ALG12/MOGS/ALG2/STT3A/ALG1/MGAT5/RPN2/DPAGT1/MAN1B1/DPM3/MAN2A1/ALG9/ALG8/ALG11/MAN1A2/STT3B/ALG5/MGAT4A/DAD1/ALG10B/ALG13/DPM1/RPN1/ALG6/RFT1/FUT8/ALG10/MGAT1/B4GALT3/MGAT4B/B4GALT1/ALG14 |
| KEGG_RNA_DEGRADATION | KEGG_RNA_DEGRADATION | KEGG_RNA_DEGRADATION | 53 | 0.453193110334642 | 1.84233565614914 | 3.78851830035431e-05 | 0.000936305237087565 | 0.000774794720072461 | 7281 | tags=87%, list=46%, signal=47% | LSM4/LSM7/HSPA9/EXOSC6/EXOSC10/EDC4/HSPD1/WDR61/EXOSC1/EXOSC7/EXOSC5/EXOSC2/CNOT7/CNOT6L/EXOSC9/DCP1A/LSM5/ENO2/DCP1B/TTC37/LSM8/PARN/LSM2/CNOT2/DCPS/ZCCHC7/DIS3/MPHOSPH6/EXOSC3/CNOT1/CNOT4/EXOSC8/CNOT10/EDC3/LSM3/ENO3/CNOT6/PNPT1/PAPOLG/SKIV2L/LSM1/DDX6/XRN1/CNOT8/CNOT3/PATL1 |
| KEGG_HUNTINGTONS_DISEASE | KEGG_HUNTINGTONS_DISEASE | KEGG_HUNTINGTONS_DISEASE | 160 | 0.342174416490771 | 1.55442448302853 | 4.96714943970179e-05 | 0.00107414606633551 | 0.000888858320788742 | 7248 | tags=68%, list=46%, signal=37% | NDUFB2/TP53/NDUFV1/NDUFS8/NDUFAB1/SLC25A6/SLC25A5/COX6C/NDUFS7/POLR2D/MT-ATP8/MT-CO1/VDAC1/COX7C/NDUFS3/NDUFB5/COX5A/MT-ATP6/NDUFA8/POLR2K/POLR2H/CYCS/NDUFB7/HDAC1/MT-CYB/TFAM/POLR2L/MT-CO2/NDUFA6/COX4I1/POLR2G/NDUFS6/TBP/NDUFB10/SDHA/NDUFA9/CREB3L2/POLR2F/CYC1/BAX/CLTA/UQCRQ/POLR2E/CREB3/NDUFB4/VDAC2/NDUFB8/DNAL1/NDUFS4/MT-CO3/NRF1/UQCRC2/HTT/NDUFA10/NDUFS5/SOD1/NDUFA3/NDUFA5/CASP3/TAF4/ITPR1/NDUFV3/SLC25A4/POLR2B/NDUFA4/SIN3A/TAF4B/NDUFS1/POLR2A/BBC3/PLCB1/NDUFA7/REST/COX6A1/NDUFC2/VDAC3/UQCRB/COX5B/UQCRH/AP2A2/CREB1/PLCB3/POLR2I/COX8A/DNAH1/NDUFB6/UQCRFS1/DCTN1/NDUFS2/SDHD/UQCR10/IFT57/CREB3L4/NDUFC1/UQCRC1/NDUFV2/NDUFB9/HDAC2/COX7A2/PPID/POLR2J2/POLR2J3/DLG4/CASP8/PLCB2/DNAL4/AP2B1/CREBBP |
| KEGG_PEROXISOME | KEGG_PEROXISOME | KEGG_PEROXISOME | 73 | 0.407824218879022 | 1.71789599986747 | 6.37360414673655e-05 | 0.0012002092612938 | 0.000993175902257119 | 5103 | tags=58%, list=32%, signal=39% | IDH2/DHRS4/ACSL5/ECH1/PMVK/HACL1/PEX26/ECI2/PEX16/PEX14/MPV17/PEX11B/PXMP4/SLC25A17/PEX3/PEX6/MLYCD/CROT/PHYH/PEX12/GSTK1/PRDX1/AGPS/PEX10/GNPAT/EPHX2/SCP2/ABCD3/HMGCL/PEX1/ABCD4/SOD1/PEX11A/MVK/ACOX3/ABCD2/NUDT19/PEX13/HSD17B4/PAOX/ABCD1/PXMP2 |
| KEGG_OXIDATIVE_PHOSPHORYLATION | KEGG_OXIDATIVE_PHOSPHORYLATION | KEGG_OXIDATIVE_PHOSPHORYLATION | 108 | 0.373856434601024 | 1.64100906245257 | 6.93762578782546e-05 | 0.0012002092612938 | 0.000993175902257119 | 6249 | tags=65%, list=40%, signal=39% | NDUFB2/MT-ND5/MT-ND6/NDUFV1/NDUFS8/NDUFAB1/PPA1/COX6C/NDUFS7/MT-ATP8/MT-CO1/COX7C/NDUFS3/NDUFB5/MT-ND4/COX5A/MT-ND4L/MT-ATP6/NDUFA8/NDUFA11/NDUFB7/MT-CYB/MT-CO2/NDUFA6/COX4I1/NDUFS6/NDUFB10/SDHA/MT-ND2/NDUFA9/MT-ND1/CYC1/ATP6V0E2/COX11/MT-ND3/UQCRQ/NDUFB4/ATP6V0A2/NDUFB8/NDUFS4/MT-CO3/UQCRC2/COX10/NDUFA10/NDUFS5/NDUFA3/NDUFA5/NDUFV3/ATP6V1G1/NDUFA4/NDUFS1/NDUFA7/ATP6V1F/COX6A1/NDUFC2/UQCRB/COX5B/UQCRH/ATP6V1E2/COX8A/NDUFB6/UQCRFS1/NDUFS2/SDHD/UQCR10/NDUFC1/ATP6V1G2/UQCRC1/NDUFV2/NDUFB9 |
| KEGG_AMINOACYL_TRNA_BIOSYNTHESIS | KEGG_AMINOACYL_TRNA_BIOSYNTHESIS | KEGG_AMINOACYL_TRNA_BIOSYNTHESIS | 22 | 0.568738282464585 | 1.99376098323691 | 0.000154953415599877 | 0.00234503335137694 | 0.00194052044896419 | 3887 | tags=77%, list=25%, signal=58% | FARSA/LARS2/YARS2/TARS2/SARS2/PARS2/MARS2/FARS2/EARS2/AARS2/WARS2/FARSB/VARS2/SEPSECS/DARS2/IARS2/NARS2 |
| KEGG_CITRATE_CYCLE_TCA_CYCLE | KEGG_CITRATE_CYCLE_TCA_CYCLE | KEGG_CITRATE_CYCLE_TCA_CYCLE | 29 | 0.516640635796356 | 1.92185379368757 | 0.00019809761410588 | 0.00234503335137694 | 0.00194052044896419 | 4303 | tags=69%, list=27%, signal=50% | IDH2/SUCLG2/MDH2/MDH1/IDH3B/CS/IDH3A/DLAT/SDHA/ACLY/SUCLA2/DLST/ACO2/ACO1/PDHB/PDHA1/FH/PCK2/OGDH/IDH3G |
| KEGG_RNA_POLYMERASE | KEGG_RNA_POLYMERASE | KEGG_RNA_POLYMERASE | 28 | 0.514336158526118 | 1.90395080667161 | 0.000170961222576347 | 0.00234503335137694 | 0.00194052044896419 | 4692 | tags=75%, list=30%, signal=53% | POLR1B/POLR2D/POLR3D/POLR2K/POLR2H/POLR1E/POLR2L/POLR1C/POLR2G/POLR3B/POLR3A/POLR2F/POLR1A/POLR2E/POLR3C/POLR3H/POLR3GL/POLR3F/POLR2B/POLR2A/POLR3K |
| KEGG_VALINE_LEUCINE_AND_ISOLEUCINE_DEGRADATION | KEGG_VALINE_LEUCINE_AND_ISOLEUCINE_DEGRADATION | KEGG_VALINE_LEUCINE_AND_ISOLEUCINE_DEGRADATION | 42 | 0.461941167289646 | 1.80874595744019 | 0.000180789758206289 | 0.00234503335137694 | 0.00194052044896419 | 3548 | tags=60%, list=23%, signal=46% | ECHS1/HSD17B10/IVD/BCAT2/HIBADH/OXCT1/ACAA2/ALDH9A1/MCCC1/ACAT2/ACAT1/DBT/HADH/PCCA/ALDH6A1/BCKDHA/ACADM/ACADS/ALDH3A2/ACADSB/MCCC2/PCCB/ALDH1B1/BCKDHB/HMGCL |
| KEGG_NUCLEOTIDE_EXCISION_REPAIR | KEGG_NUCLEOTIDE_EXCISION_REPAIR | KEGG_NUCLEOTIDE_EXCISION_REPAIR | 44 | 0.457376198741377 | 1.80156610140903 | 0.000203326591159851 | 0.00234503335137694 | 0.00194052044896419 | 5486 | tags=70%, list=35%, signal=46% | PCNA/POLE3/XPA/RPA1/RPA3/POLD1/POLD2/GTF2H4/DDB2/POLE/ERCC1/RFC1/DDB1/RFC5/ERCC4/LIG1/GTF2H3/GTF2H1/ERCC3/ERCC2/POLE4/ERCC6/RFC3/MNAT1/GTF2H5/RFC4/POLD4/ERCC5/RPA2/XPC/ERCC8 |
| KEGG_MISMATCH_REPAIR | KEGG_MISMATCH_REPAIR | KEGG_MISMATCH_REPAIR | 23 | 0.539286067774602 | 1.91032738222498 | 0.000268461772209557 | 0.00290274291201584 | 0.00240202638292762 | 4916 | tags=78%, list=31%, signal=54% | PCNA/RPA1/RPA3/POLD1/POLD2/SSBP1/RFC1/RFC5/LIG1/MLH3/PMS2/MSH2/MLH1/RFC3/RFC4/POLD4/MSH6/RPA2 |
| KEGG_MATURITY_ONSET_DIABETES_OF_THE_YOUNG | KEGG_MATURITY_ONSET_DIABETES_OF_THE_YOUNG | KEGG_MATURITY_ONSET_DIABETES_OF_THE_YOUNG | 13 | -0.556254368 | -2.296361725 | 0.000365385755614325 | 0.00371833739536931 | 0.00307693267885748 | 6999 | tags=100%, list=44%, signal=56% | HES1/BHLHA15/PAX6/HNF1B/GCK/NR5A2/SLC2A2/MNX1/HNF4A/NEUROG3/MAFA/PKLR |
| KEGG_PYRIMIDINE_METABOLISM | KEGG_PYRIMIDINE_METABOLISM | KEGG_PYRIMIDINE_METABOLISM | 95 | 0.362781269083978 | 1.56782382478707 | 0.000627383907463009 | 0.00602985644395003 | 0.00498971996578767 | 5495 | tags=58%, list=35%, signal=38% | NME3/NME2/DCTD/ITPA/POLE3/CAD/RRM1/POLR1B/POLR2D/UCKL1/UCK1/POLD1/POLD2/POLR3D/UMPS/POLR2K/DUT/ENTPD6/POLR2H/POLE/POLR1E/POLR2L/DTYMK/UPRT/POLR1C/POLR2G/POLR3B/POLR3A/CTPS1/POLR2F/POLR1A/AK3/POLE4/POLR2E/CMPK1/POLR3C/PRIM2/POLR3H/NT5C/POLR3GL/POLA2/PRIM1/POLA1/POLR3F/POLR2B/CTPS2/POLD4/POLR2A/POLR3K/UCK2/DCK/NME7/POLR2I/TXNRD2/NUDT2 |
| KEGG_UBIQUITIN_MEDIATED_PROTEOLYSIS | KEGG_UBIQUITIN_MEDIATED_PROTEOLYSIS | KEGG_UBIQUITIN_MEDIATED_PROTEOLYSIS | 127 | 0.328498568125683 | 1.46154115773176 | 0.00120574033677733 | 0.0109785830664462 | 0.00908480253749125 | 9477 | tags=85%, list=60%, signal=34% | PRPF19/SAE1/CDC23/UBA2/UBE2Q2/CUL1/DDB2/BIRC3/UBA7/PPIL2/UBE2N/UBE2G2/CBLB/UBE2Z/HUWE1/WWP1/ANAPC13/UBE2D4/ANAPC5/DDB1/KEAP1/UBE2I/ANAPC1/TRIM32/VHL/STUB1/UBE3C/FBXO4/UBE3A/PIAS3/BTRC/ANAPC2/FBXW8/ANAPC7/BIRC6/CUL5/UBE2E1/UBE2Q1/CUL7/ANAPC10/PIAS4/HERC1/CDC16/CUL2/ANAPC11/ANAPC4/SKP2/KLHL9/UBE2L3/TRIM37/SYVN1/SIAH1/PML/FANCL/UBE2E3/UBE2E2/ERCC8/FBXW7/UBOX5/CDC27/FBXW11/SMURF2/UBE2S/UBE2D2/SMURF1/RNF7/HERC2/UBE2G1/TRAF6/UBE2L6/UBE2K/NHLRC1/XIAP/UBE3B/UBE2J2/SOCS1/CUL4A/MDM2/UBE4B/DET1/CDC26/FBXO2/UBE2A/UBR5/AIRE/PIAS1/RHOBTB2/UBA6/CUL3/MAP3K1/FZR1/ITCH/UBA1/PIAS2/WWP2/HERC4/CBL/BRCA1/UBE4A/CUL4B/UBA3/BIRC2/RBX1/RCHY1/HERC3/TRIP12/UBE2W/CDC20 |
| KEGG_SELENOAMINO_ACID_METABOLISM | KEGG_SELENOAMINO_ACID_METABOLISM | KEGG_SELENOAMINO_ACID_METABOLISM | 23 | 0.485602711593005 | 1.72016340171158 | 0.00225548108018088 | 0.0195099113435646 | 0.0161444961528737 | 4584 | tags=61%, list=29%, signal=43% | LCMT1/METTL2B/SEPHS1/AHCY/MARS2/SCLY/AHCYL2/TRMT11/LCMT2/HEMK1/GGT7/MAT2A/MAT2B/METTL6 |
| KEGG_LYSINE_DEGRADATION | KEGG_LYSINE_DEGRADATION | KEGG_LYSINE_DEGRADATION | 38 | 0.420003537688685 | 1.62424949929986 | 0.00239356484756458 | 0.0197184151727939 | 0.0163170335473074 | 6324 | tags=71%, list=40%, signal=43% | ECHS1/EHMT2/SETD1A/GCDH/SUV39H1/PLOD3/ALDH9A1/ACAT2/ACAT1/AASDHPPT/HADH/DLST/EHMT1/AASDH/ALDH3A2/ALDH1B1/SETDB2/SUV39H2/OGDH/SETD7/SETD1B/SETMAR/ASH1L/DOT1L/NSD1/HADHA/SETD2 |
| KEGG_PROPANOATE_METABOLISM | KEGG_PROPANOATE_METABOLISM | KEGG_PROPANOATE_METABOLISM | 31 | 0.430990388767115 | 1.61872284166117 | 0.00625293173094861 | 0.0491707813388231 | 0.0406889337516273 | 5028 | tags=61%, list=32%, signal=42% | ECHS1/LDHB/SUCLG2/ACSS1/ALDH9A1/MLYCD/ACAT2/ACAT1/SUCLA2/PCCA/ALDH6A1/ACADM/ALDH3A2/PCCB/ALDH1B1/ACACA/MCEE/ACACB/HIBCH |

Table S4-3 DUSP13

|  | **ID** | **Description** | **setSize** | **enrichmentScore** | **NES** | **pvalue** | **p.adjust** | **qvalue** | **rank** | **leading_edge** | **core_enrichment** |
| --- | --- | --- | --- | --- | --- | --- | --- | --- | --- | --- | --- |
| KEGG_ENDOCYTOSIS | KEGG_ENDOCYTOSIS | KEGG_ENDOCYTOSIS | 174 | 0.518993507796893 | 1.55112212524516 | 4.72336060514036e-09 | 8.31311466504703e-07 | 5.31999562894756e-07 | 5064 | tags=59%, list=32%, signal=40% | RAB31/NEDD4/GRK6/SH3GLB1/SMAP2/IGF1R/ARRB2/HSPA1A/HSPA1B/CHMP2B/CHMP2A/ARFGAP3/CXCR1/ASAP1/RAB5A/ACAP1/IQSEC1/CLTCL1/CDC42/AGAP2/PLD1/VPS37B/DNM2/CLTC/RAB11A/TSG101/CXCR2/CHMP4B/RAB5B/CHMP3/EHD1/CBL/STAM2/RAB5C/CHMP4C/SH3GL1/EPS15/ARAP1/VPS25/ACAP2/ITCH/PIP5K1A/GIT2/AP2A1/HSPA6/VTA1/HSPA1L/EPN1/USP8/PDCD6IP/CHMP1B/DAB2/RNF41/HLA-C/SMURF1/HGS/VPS4B/CLTB/SMURF2/VPS37C/RAB11B/PIKFYVE/RAB11FIP1/HLA-E/TRAF6/RBSN/STAM/SH3KBP1/ARAP2/CHMP6/SMAP1/VPS37A/EGFR/MDM2/STAMBP/LDLR/ARAP3/VPS28/RAB22A/CHMP5/HLA-F/RAB11FIP4/AP2A2/AP2B1/EHD4/ARFGAP1/RAB11FIP2/HLA-B/PRKCZ/EEA1/AP2M1/HSPA2/ARFGAP2/PRKCI/HLA-A/EPN2/PSD4/CLTA/RUFY1/ARF6/SNF8/VPS4A |
| KEGG_NEUROTROPHIN_SIGNALING_PATHWAY | KEGG_NEUROTROPHIN_SIGNALING_PATHWAY | KEGG_NEUROTROPHIN_SIGNALING_PATHWAY | 123 | 0.549185876959355 | 1.61807031951854 | 1.8042122038225e-08 | 1.5877067393638e-06 | 1.0160563463632e-06 | 4280 | tags=59%, list=27%, signal=43% | SORT1/IRS2/IRAK3/MAPK14/SOS2/MAPKAPK2/MAPK3/MAPK10/RPS6KA1/RHOA/PSEN1/PRKCD/MAP3K3/PIK3CB/ARHGDIB/RPS6KA3/CDC42/KIDINS220/YWHAZ/PIK3CG/SH2B2/NFKBIA/MAPK1/BRAF/KRAS/IRAK4/MAP3K5/PIK3CD/CRK/GSK3B/MAPK13/GRB2/YWHAH/CALM2/RAC1/NFKB1/RAP1A/PIK3CA/MAP3K1/MAP2K1/PLCG2/RAF1/YWHAB/PDPK1/GAB1/YWHAG/FOXO3/YWHAE/CSK/ARHGDIA/RAP1B/PIK3R5/SHC1/MAPK7/TRAF6/CALML3/CAMK2G/CRKL/NRAS/RELA/MAP2K2/RPS6KA2/CALM1/ZNF274/CAMK2B/PRDM4/ATF4/RAPGEF1/JUN/FRS2/AKT2/NFKBIB |
| KEGG_B_CELL_RECEPTOR_SIGNALING_PATHWAY | KEGG_B_CELL_RECEPTOR_SIGNALING_PATHWAY | KEGG_B_CELL_RECEPTOR_SIGNALING_PATHWAY | 74 | 0.587132798299246 | 1.67869721849045 | 4.30405927009751e-07 | 1.51502886307432e-05 | 9.69545982948281e-06 | 3640 | tags=55%, list=23%, signal=43% | LILRB3/SOS2/MAPK3/CHP1/LYN/PIK3CB/RAC2/CHUK/VAV3/PIK3CG/IKBKG/NFKBIA/PPP3R1/MAPK1/IFITM1/KRAS/PIK3AP1/VAV1/PIK3CD/PTPN6/GSK3B/BCL10/GRB2/PPP3CA/RAC1/SYK/NFKB1/PIK3CA/MAP2K1/PLCG2/PPP3CB/RAF1/PRKCB/FOS/NFAT5/PIK3R5/BTK/NRAS/RELA/MAP2K2/INPP5D |
| KEGG_FC_GAMMA_R_MEDIATED_PHAGOCYTOSIS | KEGG_FC_GAMMA_R_MEDIATED_PHAGOCYTOSIS | KEGG_FC_GAMMA_R_MEDIATED_PHAGOCYTOSIS | 90 | 0.560800231747774 | 1.62117496625855 | 3.79141794602193e-07 | 1.51502886307432e-05 | 9.69545982948281e-06 | 2184 | tags=48%, list=14%, signal=41% | AMPH/HCK/MARCKS/VASP/MAPK3/LIMK2/MYO10/FCGR2A/ASAP1/ARPC5/LYN/PRKCD/PIK3CB/RAC2/CFL1/ARPC3/CDC42/ARPC2/VAV3/PLD1/PIK3CG/DNM2/ARPC1B/MAPK1/WASF2/GAB2/ARPC4/WAS/VAV1/PIK3CD/PTPRC/GSN/CRK/PLA2G4A/ARPC1A/RAC1/SYK/PIP5K1A/PIK3CA/MAP2K1/PLCG2/RAF1/FCGR1A |
| KEGG_MAPK_SIGNALING_PATHWAY | KEGG_MAPK_SIGNALING_PATHWAY | KEGG_MAPK_SIGNALING_PATHWAY | 238 | 0.471095109535639 | 1.42474999649923 | 3.41016222873165e-07 | 1.51502886307432e-05 | 9.69545982948281e-06 | 3575 | tags=39%, list=23%, signal=31% | MKNK1/IL1R2/STK3/MAP2K6/CACNA1E/IL1R1/GADD45A/MAPK14/RASGRP4/ARRB2/SOS2/HSPA1A/HSPA1B/MAPKAPK2/MAPK3/CHP1/MAPK10/RPS6KA1/CD14/MAP4K4/MAP3K3/RAC2/RPS6KA3/CDC42/CHUK/RAPGEF2/PRKACA/DUSP1/LAMTOR3/IKBKG/SRF/TNFRSF1A/PPP3R1/FGF13/MAPK1/RASA2/MAP3K13/TGFBR1/MAP2K3/BRAF/KRAS/PPM1B/MAP3K5/CACNA2D1/CRK/MAP3K8/MAPK13/GRB2/PAK2/DDIT3/PLA2G4A/MAP3K11/NF1/MKNK2/PPP3CA/RAC1/TAOK1/NFKB1/RAP1A/HSPA6/TAB2/MAP3K1/MAP2K1/HSPA1L/PPP3CB/RAF1/MAP2K4/DUSP3/NLK/MAP3K2/GADD45B/PRKCB/MAP3K6/MAX/FOS/RASA1/ATF2/TAOK3/RAP1B/FGF23/MAPK7/TRAF6/STK4/TAOK2/TGFB1/RASGRP2/TGFBR2/CRKL/FAS/NRAS/RELA/MAP2K2/EGFR/RPS6KA2 |
| KEGG_LYSOSOME | KEGG_LYSOSOME | KEGG_LYSOSOME | 118 | 0.523540522743162 | 1.53839452634526 | 9.32647675546795e-07 | 2.73576651493726e-05 | 1.75075967164047e-05 | 5167 | tags=63%, list=33%, signal=42% | SORT1/SLC11A1/GBA/CD63/SUMF1/ATP6V0D1/GNS/CLTCL1/AP3B2/ATP6AP1/AP3S1/CTSD/ATP6V0B/IGF2R/CLTC/GALNS/AP3S2/LAPTM4A/LAPTM5/LAMP1/GAA/ATP6V0A1/ASAH1/MCOLN1/GM2A/TCIRG1/LAMP2/AP1G1/GLA/IDS/ABCA2/AP1M1/CTSB/ATP6V1H/ARSG/CD164/SLC17A5/AP3B1/GALC/CTSL/CTSH/CLN3/CLTB/NEU1/ENTPD4/GGA3/PSAP/GLB1/CTSZ/ARSA/HGSNAT/PPT1/CTSA/ARSB/GGA1/AP3D1/HEXB/AGA/NAGA/TPP1/ATP6V0C/CTSS/SGSH/GUSB/MANBA/SCARB2/PLA2G15/FUCA1/CLN5/CLTA/CTSK/CD68/GNPTG/AP3M1 |
| KEGG_REGULATION_OF_ACTIN_CYTOSKELETON | KEGG_REGULATION_OF_ACTIN_CYTOSKELETON | KEGG_REGULATION_OF_ACTIN_CYTOSKELETON | 192 | 0.477972313405636 | 1.43570934376881 | 1.24067053193001e-06 | 3.11940019456688e-05 | 1.99626687092498e-05 | 4430 | tags=45%, list=28%, signal=33% | ITGAM/SOS2/ACTN1/MAPK3/MYLK3/SSH1/IQGAP1/LIMK2/MYL12A/CD14/RHOA/PXN/ARPC5/PIK3CB/RAC2/PPP1R12A/CFL1/ARPC3/CDC42/ACTB/PPP1CB/ARPC2/VAV3/ROCK1/PIK3CG/ARPC1B/SSH3/FGF13/MAPK1/MYL12B/WASF2/ARPC4/ITGAX/SSH2/BRAF/KRAS/FGD3/MYH9/WAS/VAV1/MSN/PIK3CD/GSN/ITGA1/CRK/DIAPH1/VCL/GNA13/ACTG1/PAK2/SLC9A1/ITGB2/ARPC1A/RAC1/PIP5K1A/PIK3CA/MAP2K1/ITGA7/RAF1/ARAF/NCKAP1L/APC/CSK/ITGA5/PFN1/PIKFYVE/FGF23/PIK3R5/ACTN4/CRKL/ROCK2/PPP1CA/MYH10/NRAS/MAP2K2/EGFR/ARHGEF1/ITGA9/IQGAP2/CHRM5/PDGFC/CYFIP2/CYFIP1/FGF11/PAK1/BRK1/ARHGEF7 |
| KEGG_LEUKOCYTE_TRANSENDOTHELIAL_MIGRATION | KEGG_LEUKOCYTE_TRANSENDOTHELIAL_MIGRATION | KEGG_LEUKOCYTE_TRANSENDOTHELIAL_MIGRATION | 107 | 0.528942083218557 | 1.54683842103181 | 1.65136955838125e-06 | 3.63301302843874e-05 | 2.32495450982623e-05 | 3485 | tags=45%, list=22%, signal=35% | MMP9/MAPK14/ITGAM/NCF4/VASP/ACTN1/CTNNA1/GNAI3/MYL12A/RHOA/PXN/PIK3CB/RAC2/CDC42/ACTB/VAV3/CYBA/NCF2/ROCK1/PIK3CG/MYL12B/SIPA1/GNAI2/VAV1/MSN/PIK3CD/PTK2B/VCL/MAPK13/ACTG1/CTNNB1/ITGB2/RAC1/RAP1A/PIK3CA/PLCG2/CLDN10/RASSF5/CLDN11/F11R/CLDN9/PRKCB/RAP1B/PIK3R5/ACTN4/ICAM1/ROCK2/CYBB |
| KEGG_PATHOGENIC_ESCHERICHIA_COLI_INFECTION | KEGG_PATHOGENIC_ESCHERICHIA_COLI_INFECTION | KEGG_PATHOGENIC_ESCHERICHIA_COLI_INFECTION | 54 | 0.601691855428349 | 1.68472499819006 | 3.02157709066258e-06 | 5.90886186618461e-05 | 3.78138887369469e-05 | 1861 | tags=43%, list=12%, signal=38% | TUBA4A/TLR5/TLR4/TUBA1A/HCLS1/CD14/RHOA/ARPC5/ARPC3/CDC42/ACTB/ARPC2/YWHAZ/ROCK1/ARPC1B/TUBB4B/LY96/ARPC4/WAS/TUBA1C/ACTG1/CTNNB1/ARPC1A |
| KEGG_NON_SMALL_CELL_LUNG_CANCER | KEGG_NON_SMALL_CELL_LUNG_CANCER | KEGG_NON_SMALL_CELL_LUNG_CANCER | 53 | 0.598072815990846 | 1.67259654634962 | 4.19906798602285e-06 | 6.22370102002319e-05 | 3.98287086807704e-05 | 3790 | tags=58%, list=24%, signal=45% | TGFA/SOS2/E2F3/MAPK3/PIK3CB/PIK3CG/MAPK1/RXRA/BRAF/KRAS/PIK3CD/E2F2/GRB2/RB1/PIK3CA/MAP2K1/PLCG2/RAF1/CASP9/ARAF/PDPK1/RASSF5/FOXO3/PRKCB/PIK3R5/STK4/RXRB/NRAS/MAP2K2/EGFR/PRKCG |
| KEGG_CHRONIC_MYELOID_LEUKEMIA | KEGG_CHRONIC_MYELOID_LEUKEMIA | KEGG_CHRONIC_MYELOID_LEUKEMIA | 72 | 0.57097385283559 | 1.62830846698263 | 4.39405976032493e-06 | 6.22370102002319e-05 | 3.98287086807704e-05 | 3569 | tags=56%, list=23%, signal=43% | SOS2/E2F3/MAPK3/STAT5B/PIK3CB/CHUK/PIK3CG/IKBKG/NFKBIA/MAPK1/CTBP2/TGFBR1/GAB2/BRAF/KRAS/CBL/PIK3CD/CRK/E2F2/GRB2/RB1/NFKB1/PIK3CA/MAP2K1/RAF1/ARAF/RUNX1/PIK3R5/SHC1/CDKN1B/STAT5A/TGFB1/SMAD4/TGFBR2/CRKL/HDAC2/NRAS/RELA/MAP2K2/MDM2 |
| KEGG_INSULIN_SIGNALING_PATHWAY | KEGG_INSULIN_SIGNALING_PATHWAY | KEGG_INSULIN_SIGNALING_PATHWAY | 129 | 0.503651068215547 | 1.48734677178352 | 4.59705188978985e-06 | 6.22370102002319e-05 | 3.98287086807704e-05 | 5144 | tags=59%, list=33%, signal=40% | MKNK1/IRS2/FLOT1/PPP1R3D/FLOT2/PYGL/HK3/SOCS3/HK2/SOS2/MAPK3/PPP1R3B/MAPK10/PIK3CB/PRKAR2A/PPP1CB/PRKACA/PIK3CG/SH2B2/PHKA2/PRKAR1A/MAPK1/BRAF/KRAS/CBL/PIK3CD/CRK/GSK3B/GRB2/MKNK2/INSR/CALM2/PIK3CA/PTPN1/MAP2K1/RAF1/PYGM/ARAF/PRKAA1/PDPK1/PPARGC1A/PDE3B/EXOC7/PRKAB1/PRKAG1/FBP1/PPP1R3C/GYS1/PIK3R5/SHC1/CALML3/CRKL/PPP1CA/RHEB/NRAS/MAP2K2/CALM1/INPP5D/EIF4E1B/RAPGEF1/FOXO1/PHKG1/AKT2/RPS6KB2/PRKCZ/EIF4E2/EIF4E/PRKCI/BAD/PHKB/PHKG2/HK1/INPP5K/PCK1/IKBKB/TSC2 |
| KEGG_CHEMOKINE_SIGNALING_PATHWAY | KEGG_CHEMOKINE_SIGNALING_PATHWAY | KEGG_CHEMOKINE_SIGNALING_PATHWAY | 174 | 0.479934162469348 | 1.43438499110965 | 3.56014527542807e-06 | 6.22370102002319e-05 | 3.98287086807704e-05 | 3530 | tags=40%, list=22%, signal=32% | GNG10/GRK6/CXCL16/GNB2/GNG5/HCK/ARRB2/FGR/SOS2/MAPK3/CXCR1/GNAI3/STAT5B/JAK3/RHOA/PXN/LYN/JAK2/PRKCD/PIK3CB/RAC2/CDC42/CHUK/VAV3/STAT3/PREX1/PRKACA/ROCK1/PIK3CG/IKBKG/NFKBIA/ADCY4/MAPK1/BRAF/KRAS/CXCR2/GNG2/WAS/GNAI2/VAV1/PIK3CD/CRK/GSK3B/PTK2B/GNB1/GRB2/RAC1/NFKB1/RAP1A/PIK3CA/MAP2K1/GSK3A/RAF1/CXCL1/DOCK2/FOXO3/PRKCB/CSK/RAP1B/PIK3R5/SHC1/CCR1/RASGRP2/ELMO1/CCL24/CRKL/ROCK2/CCR2/NRAS/RELA |
| KEGG_NOD_LIKE_RECEPTOR_SIGNALING_PATHWAY | KEGG_NOD_LIKE_RECEPTOR_SIGNALING_PATHWAY | KEGG_NOD_LIKE_RECEPTOR_SIGNALING_PATHWAY | 59 | 0.580402868432497 | 1.63460912940366 | 5.37894747221475e-06 | 6.52940714776345e-05 | 4.17850816274335e-05 | 4537 | tags=63%, list=29%, signal=45% | MAPK14/NLRC4/NAIP/MAPK3/CARD6/MAPK10/NLRP3/CHUK/CASP5/IKBKG/NFKBIA/MAPK1/MEFV/MAPK13/CARD8/NFKB1/TAB2/TAB3/PSTPIP1/CXCL1/TRIP6/PYCARD/CASP8/CARD18/NOD2/TRAF6/IL18/BIRC2/TNFAIP3/RELA/CASP1/XIAP/MAP3K7/NFKBIB/HSP90AA1/NLRP1/HSP90B1 |
| KEGG_TOLL_LIKE_RECEPTOR_SIGNALING_PATHWAY | KEGG_TOLL_LIKE_RECEPTOR_SIGNALING_PATHWAY | KEGG_TOLL_LIKE_RECEPTOR_SIGNALING_PATHWAY | 91 | 0.538416197012878 | 1.55788796318854 | 5.56483563729839e-06 | 6.52940714776345e-05 | 4.17850816274335e-05 | 3559 | tags=48%, list=23%, signal=38% | MAP2K6/TLR5/MAPK14/TLR4/TLR8/TLR2/SPP1/MAPK3/IFNAR1/MAPK10/CD14/TLR1/PIK3CB/MYD88/TOLLIP/CHUK/PIK3CG/IKBKG/NFKBIA/TLR6/MAPK1/LY96/FADD/MAP2K3/IRAK4/PIK3CD/TIRAP/MAP3K8/MAPK13/RAC1/NFKB1/PIK3CA/TAB2/MAP2K1/IFNAR2/MAP2K4/TBK1/CASP8/FOS/PIK3R5/TRAF6/RIPK1/RELA/MAP2K2 |
| KEGG_SPLICEOSOME | KEGG_SPLICEOSOME | KEGG_SPLICEOSOME | 125 | 0.503510266995302 | 1.48404989467113 | 6.1178559914491e-06 | 6.72964159059401e-05 | 4.30664862555956e-05 | 5959 | tags=66%, list=38%, signal=41% | HSPA1A/HSPA1B/U2AF1/SF3B6/PCBP1/ISY1/PRPF18/HSPA6/ZMAT2/SRSF9/HSPA1L/SMNDC1/HNRNPK/SNRNP27/BUD31/CRNKL1/DDX5/CDC5L/SART1/DHX8/CDC40/LSM6/SLU7/SYF2/RBM22/DDX42/DHX16/PRPF38B/SNW1/ACIN1/SF3B1/SF3A1/SRSF4/SF3B4/DDX39B/HNRNPU/SF3B2/PRPF38A/TRA2A/LSM3/SRSF5/RBM8A/DDX23/HNRNPM/HNRNPC/PRPF3/RBM25/PRPF40A/SRSF2/MAGOH/CWC15/DHX38/DDX46/SRSF1/HNRNPA3/RBM17/SRSF3/SNRPB2/HSPA2/SNRNP70/EIF4A3/U2SURP/SNRPB/AQR/PRPF4/USP39/SNRPG/XAB2/BCAS2/ALYREF/PRPF6/TRA2B/U2AF2/CCDC12/CTNNBL1/SNRNP200/EFTUD2/PRPF8/WBP11/PHF5A/DHX15/PQBP1 |
| KEGG_ERBB_SIGNALING_PATHWAY | KEGG_ERBB_SIGNALING_PATHWAY | KEGG_ERBB_SIGNALING_PATHWAY | 83 | 0.534923450903059 | 1.54050249899662 | 1.00731301065996e-05 | 0.00010428652345656 | 6.67383852263872e-05 | 4481 | tags=55%, list=28%, signal=40% | TGFA/SOS2/MAPK3/AREG/STAT5B/MAPK10/PIK3CB/PIK3CG/MAPK1/BRAF/KRAS/CBL/PIK3CD/CRK/GSK3B/GRB2/PAK2/PIK3CA/MAP2K1/PLCG2/ABL2/RAF1/MAP2K4/ARAF/EREG/GAB1/NRG4/PRKCB/PIK3R5/SHC1/CDKN1B/STAT5A/CAMK2G/CRKL/NRAS/MAP2K2/EGFR/NCK2/CAMK2B/PRKCG/HBEGF/JUN/AKT2/PAK1/RPS6KB2/NCK1 |
| KEGG_GLIOMA | KEGG_GLIOMA | KEGG_GLIOMA | 65 | 0.558286136167316 | 1.58363235404056 | 1.7208412538584e-05 | 0.000168260033710599 | 0.000107678370855467 | 3790 | tags=51%, list=24%, signal=39% | PTEN/TGFA/IGF1R/SOS2/E2F3/MAPK3/PIK3CB/PIK3CG/MAPK1/BRAF/KRAS/PIK3CD/E2F2/GRB2/RB1/CALM2/PIK3CA/MAP2K1/PLCG2/RAF1/ARAF/PRKCB/PIK3R5/SHC1/CALML3/CAMK2G/NRAS/MAP2K2/EGFR/MDM2/CALM1/CAMK2B/PRKCG |
| KEGG_FC_EPSILON_RI_SIGNALING_PATHWAY | KEGG_FC_EPSILON_RI_SIGNALING_PATHWAY | KEGG_FC_EPSILON_RI_SIGNALING_PATHWAY | 70 | 0.549528782764393 | 1.56470007498882 | 2.6415584937692e-05 | 0.000244691734159674 | 0.000156591002123715 | 3640 | tags=53%, list=23%, signal=41% | MAP2K6/MAPK14/FCER1G/SOS2/MAPK3/MAPK10/LYN/PRKCD/PIK3CB/RAC2/VAV3/PIK3CG/MAPK1/GAB2/MAP2K3/KRAS/VAV1/PIK3CD/MAPK13/GRB2/PLA2G4A/RAC1/SYK/PIK3CA/MAP2K1/PLCG2/RAF1/MAP2K4/PDPK1/PRKCB/PIK3R5/IL5/LCP2/BTK/NRAS/MAP2K2/INPP5D |
| KEGG_DORSO_VENTRAL_AXIS_FORMATION | KEGG_DORSO_VENTRAL_AXIS_FORMATION | KEGG_DORSO_VENTRAL_AXIS_FORMATION | 22 | 0.704770417508958 | 1.80415469971063 | 2.78951807380773e-05 | 0.000245477590495081 | 0.000157093912577593 | 2109 | tags=50%, list=13%, signal=43% | ETS2/SOS2/MAPK3/NOTCH3/MAPK1/KRAS/ETV6/GRB2/NOTCH2/MAP2K1/NOTCH1 |
| KEGG_PANCREATIC_CANCER | KEGG_PANCREATIC_CANCER | KEGG_PANCREATIC_CANCER | 69 | 0.555764571290634 | 1.58122184703945 | 3.06195156672219e-05 | 0.000256620702734812 | 0.000164224971247757 | 3563 | tags=52%, list=23%, signal=41% | TGFA/RALB/E2F3/MAPK3/MAPK10/PIK3CB/RAC2/CDC42/CHUK/STAT3/PLD1/PIK3CG/IKBKG/MAPK1/TGFBR1/BRAF/KRAS/PIK3CD/E2F2/RB1/RAC1/NFKB1/PIK3CA/MAP2K1/RAF1/CASP9/ARAF/RALBP1/PIK3R5/SMAD2/TGFB1/SMAD4/TGFBR2/RELA/JAK1/EGFR |
| KEGG_EPITHELIAL_CELL_SIGNALING_IN_HELICOBACTER_PYLORI_INFECTION | KEGG_EPITHELIAL_CELL_SIGNALING_IN_HELICOBACTER_PYLORI_INFECTION | KEGG_EPITHELIAL_CELL_SIGNALING_IN_HELICOBACTER_PYLORI_INFECTION | 63 | 0.562528045832235 | 1.59400783805067 | 3.34620320838174e-05 | 0.00026769625667054 | 0.000171312795835812 | 4779 | tags=65%, list=30%, signal=46% | MAPK14/ATP6V1C1/ATP6V0D1/CXCR1/MAPK10/ADAM17/LYN/ATP6V0E1/CDC42/CHUK/ATP6AP1/IKBKG/NFKBIA/ATP6V0B/CXCR2/ATP6V0A1/ATP6V1E1/MAPK13/TCIRG1/RAC1/NFKB1/ATP6V1A/ATP6V1H/PLCG2/ADAM10/ATP6V1D/MAP2K4/CXCL1/F11R/ATP6V1B2/CSK/ATP6V1B1/RELA/EGFR/HBEGF/ATP6V0C/JUN/PAK1/CASP3/ATP6V1F/ATP6V1G1 |
| KEGG_NOTCH_SIGNALING_PATHWAY | KEGG_NOTCH_SIGNALING_PATHWAY | KEGG_NOTCH_SIGNALING_PATHWAY | 46 | 0.588773981990997 | 1.63628026311755 | 6.39276327743817e-05 | 0.000466448501655411 | 0.000298504722949336 | 3498 | tags=48%, list=22%, signal=37% | MAML3/RBPJ/NUMB/NOTCH3/ADAM17/PSEN1/NCSTN/JAG1/CTBP2/PSENEN/EP300/NOTCH2/DTX2/DVL3/NOTCH1/CREBBP/MAML1/NUMBL/SNW1/CIR1/APH1A/HDAC2 |
| KEGG_ACUTE_MYELOID_LEUKEMIA | KEGG_ACUTE_MYELOID_LEUKEMIA | KEGG_ACUTE_MYELOID_LEUKEMIA | 57 | 0.556062818503305 | 1.5640885301586 | 6.62568894396891e-05 | 0.000466448501655411 | 0.000298504722949336 | 5452 | tags=70%, list=35%, signal=46% | FLT3/SPI1/SOS2/MAPK3/STAT5B/CEBPA/RARA/PIK3CB/CHUK/STAT3/PIK3CG/IKBKG/MAPK1/BRAF/KRAS/PIK3CD/GRB2/NFKB1/PIK3CA/MAP2K1/RAF1/ARAF/CCNA1/ZBTB16/PIM1/RUNX1/PIK3R5/STAT5A/NRAS/RELA/MAP2K2/AKT2/RPS6KB2/BAD/TCF7L2/IKBKB/PPARD/RPS6KB1/AKT1/SOS1 |
| KEGG_LONG_TERM_POTENTIATION | KEGG_LONG_TERM_POTENTIATION | KEGG_LONG_TERM_POTENTIATION | 62 | 0.552101429399428 | 1.56322000738387 | 6.49939418344445e-05 | 0.000466448501655411 | 0.000298504722949336 | 4369 | tags=56%, list=28%, signal=41% | GNAQ/MAPK3/CHP1/RPS6KA1/PPP1R12A/RPS6KA3/PPP1CB/PRKACA/PPP3R1/MAPK1/BRAF/KRAS/CALM2/PPP3CA/RAP1A/EP300/MAP2K1/PPP3CB/RAF1/CREBBP/ARAF/PRKCB/RAP1B/CALML3/CAMK2G/PPP1CA/NRAS/MAP2K2/RPS6KA2/CALM1/CAMK2B/PRKCG/ATF4/ITPR2/PLCB3 |
| KEGG_RENAL_CELL_CARCINOMA | KEGG_RENAL_CELL_CARCINOMA | KEGG_RENAL_CELL_CARCINOMA | 66 | 0.538092594058493 | 1.5287068519886 | 9.9933392086146e-05 | 0.000676472192583142 | 0.000432909836162657 | 4394 | tags=58%, list=28%, signal=42% | TGFA/SOS2/MAPK3/HGF/HIF1A/EPAS1/PIK3CB/CDC42/PIK3CG/MAPK1/BRAF/KRAS/PIK3CD/CRK/GRB2/PAK2/EGLN2/RAC1/RAP1A/ARNT/EP300/PIK3CA/EGLN1/MAP2K1/RAF1/CREBBP/ARAF/GAB1/RAP1B/PIK3R5/TGFB1/CRKL/NRAS/MAP2K2/RAPGEF1/JUN/AKT2/PAK1 |
| KEGG_NATURAL_KILLER_CELL_MEDIATED_CYTOTOXICITY | KEGG_NATURAL_KILLER_CELL_MEDIATED_CYTOTOXICITY | KEGG_NATURAL_KILLER_CELL_MEDIATED_CYTOTOXICITY | 115 | 0.484987852590307 | 1.42461326034827 | 0.00015530832071387 | 0.00101238016465337 | 0.00064787486613583 | 4394 | tags=46%, list=28%, signal=33% | FCER1G/SOS2/IFNGR1/MAPK3/CHP1/IFNAR1/TNFRSF10C/IFNGR2/PIK3CB/RAC2/VAV3/PIK3CG/TYROBP/PPP3R1/MAPK1/BRAF/KRAS/VAV1/PIK3CD/PTPN6/PTK2B/GRB2/TNFRSF10D/ITGB2/PPP3CA/RAC1/SYK/PIK3CA/SH3BP2/MAP2K1/PLCG2/PPP3CB/IFNAR2/RAF1/ARAF/KIR2DL4/HLA-C/PRKCB/NFAT5/PIK3R5/SHC1/LCP2/HLA-E/ICAM1/FAS/NRAS/MAP2K2/PRKCG/TNFSF10/FCGR3B/BID/HLA-B/PAK1 |
| KEGG_LEISHMANIA_INFECTION | KEGG_LEISHMANIA_INFECTION | KEGG_LEISHMANIA_INFECTION | 69 | 0.534334395850782 | 1.52025023542216 | 0.000175889165629234 | 0.00110558904109804 | 0.000707524087305563 | 4280 | tags=51%, list=27%, signal=37% | CR1/MAPK14/TLR4/ITGAM/TLR2/IFNGR1/NCF4/MAPK3/FCGR2A/IFNGR2/JAK2/MYD88/CYBA/NCF2/NFKBIA/MAPK1/IRAK4/IL10/PTPN6/MAPK13/ITGB2/NFKB1/TAB2/FCGR1A/PRKCB/FOS/TRAF6/TGFB1/RELA/JAK1/NCF1/MAP3K7/FCGR3B/JUN/NFKBIB |
| KEGG_VIBRIO_CHOLERAE_INFECTION | KEGG_VIBRIO_CHOLERAE_INFECTION | KEGG_VIBRIO_CHOLERAE_INFECTION | 47 | 0.566023132464937 | 1.57566456359031 | 0.000190076438537566 | 0.00115356735112454 | 0.000738227910109601 | 4994 | tags=68%, list=32%, signal=47% | ATP6V1C1/ATP6V0D1/ATP6V0E1/ACTB/PRKACA/ATP6AP1/ATP6V0B/SEC61A2/ARF1/ATP6V0A1/ATP6V1E1/ACTG1/TCIRG1/ATP6V1A/ATP6V1H/PLCG2/ATP6V1D/KDELR3/ATP6V1B2/PRKCB/SEC61B/KDELR2/ATP6V1B1/KCNQ1/PRKCG/ATP6V0C/SEC61G/KDELR1/SEC61A1/ATP6V1F/ATP6V1G1/ADCY3 |
| KEGG_PROSTATE_CANCER | KEGG_PROSTATE_CANCER | KEGG_PROSTATE_CANCER | 87 | 0.499783973450137 | 1.44223790037295 | 0.000398731033087095 | 0.00233922206077762 | 0.00149699019439716 | 5113 | tags=56%, list=32%, signal=38% | PTEN/TGFA/IGF1R/SOS2/E2F3/MAPK3/PIK3CB/CHUK/PIK3CG/IKBKG/NFKBIA/MAPK1/CREB5/BRAF/KRAS/PIK3CD/GSK3B/E2F2/GRB2/RB1/CTNNB1/NFKB1/EP300/PIK3CA/MAP2K1/RAF1/CREBBP/CASP9/ARAF/PDPK1/PIK3R5/CDKN1B/NRAS/RELA/MAP2K2/EGFR/MDM2/CDK2/PDGFC/ATF4/FOXO1/AKT2/HSP90AA1/HSP90B1/BAD/TCF7L2/CREB3/IKBKB/CREB1 |
| KEGG_VEGF_SIGNALING_PATHWAY | KEGG_VEGF_SIGNALING_PATHWAY | KEGG_VEGF_SIGNALING_PATHWAY | 68 | 0.510999213213835 | 1.45298530615535 | 0.000421936937688616 | 0.00239551293655472 | 0.00153301366155117 | 4846 | tags=53%, list=31%, signal=37% | MAPK14/MAPKAPK2/MAPK3/CHP1/PXN/PIK3CB/RAC2/CDC42/PIK3CG/PPP3R1/MAPK1/KRAS/PIK3CD/MAPK13/PLA2G4A/PPP3CA/RAC1/PIK3CA/MAP2K1/PLCG2/PPP3CB/RAF1/CASP9/PRKCB/NFAT5/PIK3R5/NRAS/SPHK1/MAP2K2/PRKCG/MAPKAPK3/AKT2/PLA2G12B/BAD/PTGS2/VEGFA |
| KEGG_ADHERENS_JUNCTION | KEGG_ADHERENS_JUNCTION | KEGG_ADHERENS_JUNCTION | 67 | 0.505500901793438 | 1.43775144062847 | 0.00104110963561083 | 0.00572610299585957 | 0.00366443194113022 | 3563 | tags=45%, list=23%, signal=35% | IGF1R/ACTN1/MAPK3/IQGAP1/CTNNA1/RHOA/RAC2/CDC42/ACTB/MAPK1/TGFBR1/WASF2/PTPRJ/WAS/PTPN6/VCL/ACTG1/CTNNB1/INSR/RAC1/EP300/PTPN1/CREBBP/NLK/ACTN4/SMAD2/CSNK2B/SMAD4/TGFBR2/EGFR |
| KEGG_FOCAL_ADHESION | KEGG_FOCAL_ADHESION | KEGG_FOCAL_ADHESION | 188 | 0.4289337525263 | 1.28791814265658 | 0.00227539865847252 | 0.0121354595118534 | 0.00776611344359041 | 4146 | tags=38%, list=26%, signal=28% | LAMB3/PTEN/IGF1R/SPP1/SOS2/CCND3/VASP/ZYX/ACTN1/MAPK3/MYLK3/HGF/MYL12A/THBS3/MAPK10/RHOA/PXN/PIK3CB/RAC2/PPP1R12A/CDC42/ACTB/PPP1CB/VAV3/ROCK1/PIK3CG/MAPK1/MYL12B/TLN1/BRAF/VAV1/PIK3CD/ITGA1/CRK/GSK3B/DIAPH1/VCL/ACTG1/GRB2/PAK2/LAMB1/CTNNB1/RAC1/RAP1A/PIK3CA/MAP2K1/ITGA7/RAF1/LAMC1/PDPK1/ILK/PRKCB/ITGA5/RAP1B/PIK3R5/SHC1/ACTN4/LAMC2/BIRC2/CRKL/ROCK2/PPP1CA/EGFR/ITGA9/XIAP/PRKCG/THBS1/PARVG/PDGFC/RAPGEF1/JUN |
| KEGG_TYPE_II_DIABETES_MELLITUS | KEGG_TYPE_II_DIABETES_MELLITUS | KEGG_TYPE_II_DIABETES_MELLITUS | 41 | 0.536412586011283 | 1.47280368181205 | 0.00269854735536429 | 0.0123154132557398 | 0.00788127522945068 | 1981 | tags=37%, list=13%, signal=32% | IRS2/CACNA1E/HK3/SOCS3/HK2/MAPK3/MAPK10/PRKCD/PIK3CB/PIK3CG/MAPK1/PIK3CD/PKM/INSR/PIK3CA |
| KEGG_BLADDER_CANCER | KEGG_BLADDER_CANCER | KEGG_BLADDER_CANCER | 41 | 0.536032501787259 | 1.47176010181572 | 0.00269854735536429 | 0.0123154132557398 | 0.00788127522945068 | 3833 | tags=46%, list=24%, signal=35% | MMP9/E2F3/MAPK3/MAPK1/BRAF/KRAS/DAPK2/E2F2/RB1/MAP2K1/RAF1/ARAF/TYMP/DAPK3/NRAS/MAP2K2/EGFR/MDM2/THBS1 |
| KEGG_ENDOMETRIAL_CANCER | KEGG_ENDOMETRIAL_CANCER | KEGG_ENDOMETRIAL_CANCER | 51 | 0.525761270102421 | 1.47030533499068 | 0.00239356484756458 | 0.0123154132557398 | 0.00788127522945068 | 3563 | tags=51%, list=23%, signal=40% | PTEN/SOS2/MAPK3/CTNNA1/PIK3CB/PIK3CG/MAPK1/BRAF/KRAS/PIK3CD/GSK3B/GRB2/CTNNB1/PIK3CA/MAP2K1/RAF1/CASP9/ARAF/PDPK1/ILK/APC/FOXO3/PIK3R5/NRAS/MAP2K2/EGFR |
| KEGG_MTOR_SIGNALING_PATHWAY | KEGG_MTOR_SIGNALING_PATHWAY | KEGG_MTOR_SIGNALING_PATHWAY | 49 | 0.50880875999796 | 1.41987775635924 | 0.00273028011191242 | 0.0123154132557398 | 0.00788127522945068 | 5601 | tags=63%, list=36%, signal=41% | MAPK3/CAB39/RPS6KA1/HIF1A/PIK3CB/STRADA/ULK1/RPS6KA3/PIK3CG/MAPK1/BRAF/PIK3CD/DDIT4/PIK3CA/PRKAA1/PDPK1/PIK3R5/RHEB/CAB39L/RPS6KA2/EIF4E1B/RICTOR/AKT2/RPS6KB2/EIF4E2/EIF4E/VEGFA/TSC2/RPS6KB1/AKT1/TSC1 |
| KEGG_MELANOMA | KEGG_MELANOMA | KEGG_MELANOMA | 61 | 0.500306189264393 | 1.41471983630199 | 0.00279895755812267 | 0.0123154132557398 | 0.00788127522945068 | 4277 | tags=44%, list=27%, signal=32% | PTEN/IGF1R/E2F3/MAPK3/HGF/PIK3CB/PIK3CG/FGF13/MAPK1/BRAF/KRAS/PIK3CD/E2F2/RB1/PIK3CA/MAP2K1/RAF1/ARAF/FGF23/PIK3R5/NRAS/MAP2K2/EGFR/MDM2/PDGFC/FGF11/AKT2 |
| KEGG_JAK_STAT_SIGNALING_PATHWAY | KEGG_JAK_STAT_SIGNALING_PATHWAY | KEGG_JAK_STAT_SIGNALING_PATHWAY | 130 | 0.443447869319287 | 1.3098553161533 | 0.00275636756477388 | 0.0123154132557398 | 0.00788127522945068 | 3760 | tags=37%, list=24%, signal=28% | SPRED2/IL4R/SPRY3/SOCS3/SOS2/IFNGR1/CSF2RA/CCND3/CSF3R/OSM/IFNAR1/STAT5B/IL10RB/JAK3/IFNGR2/JAK2/PIK3CB/STAT3/PIK3CG/IL13RA1/PRL/IL6R/IL10/CBL/PIK3CD/STAM2/PTPN6/GRB2/CSF2RB/PIAS1/EP300/PIK3CA/IFNAR2/CREBBP/LIFR/PIM1/STAT6/TYK2/PIK3R5/IL5/CNTF/STAM/STAT5A/OSMR/SOCS5/JAK1/PIAS4/IL22RA2 |
| KEGG_HUNTINGTONS_DISEASE | KEGG_HUNTINGTONS_DISEASE | KEGG_HUNTINGTONS_DISEASE | 160 | 0.439271201819214 | 1.30890283652432 | 0.00260837696028983 | 0.0123154132557398 | 0.00788127522945068 | 7246 | tags=69%, list=46%, signal=38% | GNAQ/PPARG/COX6B2/HIP1/NDUFB3/CLTCL1/DCTN4/CLTC/APAF1/SDHC/CREB5/DCTN2/RCOR1/SP1/EP300/COX7A2L/AP2A1/POLR2C/SOD2/CREBBP/CASP9/SDHB/PPARGC1A/NDUFA1/POLR2J/UQCRC1/CASP8/COX8C/PPID/DCTN1/COX7A2/COX7B/CLTB/UQCRFS1/COX8A/TBPL1/SDHD/NDUFS2/NDUFB1/NDUFV2/HDAC2/COX5B/DNAL4/NDUFS1/NDUFB9/COX6A1/AP2A2/POLR2A/AP2B1/POLR2B/REST/SIN3A/PLCB3/NRF1/AP2M1/CASP3/UQCRC2/COX6B1/PLCB2/NDUFA7/UQCR10/NDUFC1/CLTA/DNAH1/CREB3/NDUFC2/NDUFB4/VDAC2/CREB1/IFT57/POLR2J3/BAX/NDUFA2/POLR2E/VDAC3/NDUFB8/UQCR11/UQCRQ/COX4I1/CYC1/NDUFA4/MT-CO3/HDAC1/NDUFS6/POLR2L/NDUFA10/DLG4/COX5A/NDUFB10/NDUFA8/TBP/VDAC1/NDUFB6/POLR2G/NDUFS5/TAF4/HTT/MT-CO2/DNAI1/SLC25A5/PLCB4/NDUFA9/SDHA/POLR2F/UQCRB/MT-CYB/POLR2K/MT-CO1/NDUFA6/NDUFA5/BBC3 |
| KEGG_SPHINGOLIPID_METABOLISM | KEGG_SPHINGOLIPID_METABOLISM | KEGG_SPHINGOLIPID_METABOLISM | 35 | 0.552189376590673 | 1.49345807781052 | 0.00296505271145503 | 0.0127280311516118 | 0.00814533094032574 | 3722 | tags=49%, list=24%, signal=37% | UGCG/GBA/SPTLC2/SPTLC1/ACER3/SGMS2/ASAH1/DEGS1/GLA/SGMS1/GALC/NEU1/SGPL1/GLB1/SPHK1/ARSA/SMPD2 |
| KEGG_APOPTOSIS | KEGG_APOPTOSIS | KEGG_APOPTOSIS | 84 | 0.475641249005361 | 1.37039092823347 | 0.00305234911522392 | 0.0127907962923669 | 0.00818549762729221 | 3821 | tags=44%, list=24%, signal=34% | IL1RAP/IRAK3/IL1R1/CHP1/TNFRSF10C/CFLAR/CAPN1/PIK3CB/MYD88/PRKAR2A/CHUK/PRKACA/PIK3CG/IKBKG/NFKBIA/PRKAR1A/TNFRSF1A/PPP3R1/APAF1/FADD/IRAK4/PIK3CD/CSF2RB/TNFRSF10D/PPP3CA/NFKB1/PIK3CA/PPP3CB/CASP9/CASP8/PIK3R5/BIRC2/FAS/RIPK1/RELA/XIAP/TNFSF10 |
| KEGG_PROGESTERONE_MEDIATED_OOCYTE_MATURATION | KEGG_PROGESTERONE_MEDIATED_OOCYTE_MATURATION | KEGG_PROGESTERONE_MEDIATED_OOCYTE_MATURATION | 80 | 0.467938411587646 | 1.34557911636813 | 0.00349632207780768 | 0.0143105275742826 | 0.00915805293330287 | 2498 | tags=32%, list=16%, signal=27% | MAPK14/IGF1R/MAPK3/GNAI3/MAPK10/RPS6KA1/PIK3CB/RPS6KA3/PRKACA/PIK3CG/ADCY4/MAPK1/BRAF/KRAS/GNAI2/PIK3CD/MAPK13/PIK3CA/MAP2K1/MAD2L2/RAF1/ARAF/CCNA1/PDE3B/CDC26/FZR1 |
| KEGG_PATHWAYS_IN_CANCER | KEGG_PATHWAYS_IN_CANCER | KEGG_PATHWAYS_IN_CANCER | 304 | 0.398684181257785 | 1.21216847578962 | 0.00375530656505255 | 0.0150212262602102 | 0.0096128660875747 | 4876 | tags=42%, list=31%, signal=29% | LAMB3/MMP9/PTEN/TGFA/FLT3/RALB/SPI1/IGF1R/SOS2/CSF2RA/E2F3/MAPK3/PPARG/CSF3R/HGF/CTNNA1/STAT5B/MAPK10/CEBPA/RHOA/HIF1A/EPAS1/RARA/PIK3CB/RAC2/TPM3/CDC42/CHUK/STAT3/PLD1/PIK3CG/IKBKG/NFKBIA/FGF13/MAPK1/CTBP2/RXRA/TGFBR1/FADD/BRAF/KRAS/DAPK2/CBL/PIK3CD/CRK/GSK3B/E2F2/GRB2/LAMB1/EGLN2/RB1/CTNNB1/BMP2/RAC1/NFKB1/PIAS1/ARNT/EP300/PIK3CA/EGLN1/DVL3/MAP2K1/PLCG2/RAF1/CDKN2B/CREBBP/LAMC1/CASP9/ARAF/CCNA1/ZBTB16/RASSF5/APC/CASP8/RALBP1/PRKCB/MAX/FOS/TPR/DAPK3/RUNX1/TFG/FGF23/PIK3R5/CDKN1B/TRAF6/STK4/SMAD2/LAMC2/STAT5A/RXRB/TGFB1/BIRC2/SMAD4/TGFBR2/CRKL/FAS/HDAC2/NRAS/RELA/JAK1/MAP2K2/EGFR/MDM2/XIAP/PIAS4/PRKCG/CDK2/BID/FZD5/FOXO1/JUN/FGF11/AKT2/MSH3/HSP90AA1/FZD2/HSP90B1/CASP3/BAD/STK36/MECOM/MSH6/PTGS2/VEGFA/TCF7L2/PIAS2 |
| KEGG_PRIMARY_IMMUNODEFICIENCY | KEGG_PRIMARY_IMMUNODEFICIENCY | KEGG_PRIMARY_IMMUNODEFICIENCY | 34 | -0.327562477 | -1.840730692 | 0.00395829130815228 | 0.0154813171163289 | 0.00990730222157413 | 3441 | tags=62%, list=22%, signal=48% | RAG1/CIITA/CD19/CD40/TNFRSF13C/CD4/ZAP70/BLNK/TNFRSF13B/CD79A/ADA/IL7R/UNG/ICOS/CD8A/AIRE/LCK/CD3E/CD8B/CD3D/CD40LG |
| KEGG_ALZHEIMERS_DISEASE | KEGG_ALZHEIMERS_DISEASE | KEGG_ALZHEIMERS_DISEASE | 145 | 0.438266742396771 | 1.29947035965208 | 0.00405274722825956 | 0.0155061633081235 | 0.00992320259550968 | 5762 | tags=53%, list=37%, signal=34% | GNAQ/MAPK3/ATF6/CHP1/COX6B2/GAPDH/ADAM17/NDUFB3/PSEN1/CAPN1/CDK5R1/NCSTN/TNFRSF1A/PPP3R1/MAPK1/APAF1/SDHC/FADD/GSK3B/PSENEN/CALM2/PPP3CA/LPL/COX7A2L/ADAM10/PPP3CB/CASP9/SDHB/NDUFA1/UQCRC1/CASP8/COX8C/APP/COX7A2/COX7B/UQCRFS1/COX8A/CALML3/SDHD/FAS/NDUFS2/NDUFB1/NDUFV2/APH1A/CALM1/COX5B/ERN1/ATP2A1/NDUFS1/NDUFB9/MME/COX6A1/BID/ATP2A2/CDK5/ITPR2/LRP1/ATP2A3/PLCB3/CASP3/BAD/UQCRC2/COX6B1/PLCB2/NDUFA7/UQCR10/NDUFC1/NDUFC2/NDUFB4/CACNA1D/NDUFA2/NDUFB8/UQCR11/UQCRQ/COX4I1/CYC1/IL1B |
| KEGG_REGULATION_OF_AUTOPHAGY | KEGG_REGULATION_OF_AUTOPHAGY | KEGG_REGULATION_OF_AUTOPHAGY | 22 | 0.596891041938951 | 1.52799231036914 | 0.00504196752743461 | 0.01888055925167 | 0.0120826545450281 | 4381 | tags=64%, list=28%, signal=46% | GABARAPL1/ULK1/ATG4D/GABARAP/GABARAPL2/BECN1/PRKAA1/ATG3/ATG7/PIK3C3/ATG4B/ATG12/ATG4A/ATG5 |
| KEGG_T_CELL_RECEPTOR_SIGNALING_PATHWAY | KEGG_T_CELL_RECEPTOR_SIGNALING_PATHWAY | KEGG_T_CELL_RECEPTOR_SIGNALING_PATHWAY | 103 | 0.448022001743229 | 1.30768262583218 | 0.00546559706996485 | 0.0200405225898711 | 0.0128249755808386 | 4481 | tags=48%, list=28%, signal=34% | MAPK14/SOS2/MAPK3/CHP1/RHOA/PIK3CB/CDC42/CHUK/VAV3/PIK3CG/IKBKG/NFKBIA/PPP3R1/MAPK1/KRAS/IL10/CBL/VAV1/PIK3CD/PTPRC/PTPN6/GSK3B/BCL10/MAP3K8/MAPK13/GRB2/PAK2/PPP3CA/NFKB1/PIK3CA/MAP2K1/PPP3CB/RAF1/PDPK1/FOS/NFAT5/PIK3R5/IL5/LCP2/NRAS/RELA/MAP2K2/NCK2/MAP3K7/JUN/AKT2/NFKBIB/PAK1/NCK1 |
| KEGG_GLYCOLYSIS_GLUCONEOGENESIS | KEGG_GLYCOLYSIS_GLUCONEOGENESIS | KEGG_GLYCOLYSIS_GLUCONEOGENESIS | 55 | 0.497403539357133 | 1.39504993745174 | 0.00571150247782333 | 0.0205147844101409 | 0.0131284804538581 | 2670 | tags=33%, list=17%, signal=27% | HK3/PGM1/PGK1/LDHA/HK2/ALDOA/PGM2/GAPDH/LDHAL6B/ALDH3B1/ENO1/ACSS2/DLD/ALDH2/PKM/PGAM1/PGAM4/FBP1 |
| KEGG_VASOPRESSIN_REGULATED_WATER_REABSORPTION | KEGG_VASOPRESSIN_REGULATED_WATER_REABSORPTION | KEGG_VASOPRESSIN_REGULATED_WATER_REABSORPTION | 42 | 0.514812153782157 | 1.4194380831576 | 0.00586082070499731 | 0.0206300888815905 | 0.0132022697986255 | 5355 | tags=57%, list=34%, signal=38% | RAB5A/ARHGDIB/PRKACA/DCTN4/RAB11A/DYNC2LI1/CREB5/RAB5B/DCTN2/RAB5C/STX4/DYNC1LI2/DYNC1LI1/DCTN1/RAB11B/ARHGDIA/DYNC1I2/NSF/DYNC1I1/DCTN6/ADCY3/CREB3/CREB1/DCTN5 |
| KEGG_GALACTOSE_METABOLISM | KEGG_GALACTOSE_METABOLISM | KEGG_GALACTOSE_METABOLISM | 23 | 0.590786474268354 | 1.52276003096571 | 0.00615206218346254 | 0.0208223643132578 | 0.0133253168751112 | 3474 | tags=52%, list=22%, signal=41% | MGAM/HK3/PGM1/HK2/PGM2/UGP2/GAA/GLA/GALK1/B4GALT1/GLB1/GALE |
| KEGG_GNRH_SIGNALING_PATHWAY | KEGG_GNRH_SIGNALING_PATHWAY | KEGG_GNRH_SIGNALING_PATHWAY | 92 | 0.455905865683892 | 1.31936405534367 | 0.00613484409399461 | 0.0208223643132578 | 0.0133253168751112 | 4433 | tags=45%, list=28%, signal=32% | MAP2K6/MAPK14/SOS2/GNAQ/MAPK3/MAPK10/PRKCD/MAP3K3/CDC42/PRKACA/PLD1/ADCY4/MAPK1/MAP2K3/KRAS/PTK2B/MAPK13/GRB2/PLA2G4A/CALM2/MAP3K1/MAP2K1/RAF1/MAP2K4/MMP14/MAP3K2/PRKCB/MAPK7/CALML3/CAMK2G/NRAS/MAP2K2/EGFR/CALM1/CAMK2B/HBEGF/ATF4/JUN/ITPR2/PLCB3/PLA2G12B |
| KEGG_GLYCOSAMINOGLYCAN_BIOSYNTHESIS_HEPARAN_SULFATE | KEGG_GLYCOSAMINOGLYCAN_BIOSYNTHESIS_HEPARAN_SULFATE | KEGG_GLYCOSAMINOGLYCAN_BIOSYNTHESIS_HEPARAN_SULFATE | 22 | 0.580583494053774 | 1.48624631986376 | 0.00781308097407832 | 0.0259453254988261 | 0.0166037669161148 | 1849 | tags=36%, list=12%, signal=32% | EXT1/HS3ST3B1/NDST2/EXTL3/NDST3/NDST1/HS3ST3A1/HS2ST1 |
| KEGG_THYROID_CANCER | KEGG_THYROID_CANCER | KEGG_THYROID_CANCER | 28 | 0.544284025059798 | 1.43459463342256 | 0.00830312225604399 | 0.0265699912193408 | 0.0170035230889322 | 3559 | tags=50%, list=23%, signal=39% | MAPK3/PPARG/TPM3/MAPK1/RXRA/BRAF/KRAS/CTNNB1/MAP2K1/TPR/TFG/RXRB/NRAS/MAP2K2 |
| KEGG_RIG_I_LIKE_RECEPTOR_SIGNALING_PATHWAY | KEGG_RIG_I_LIKE_RECEPTOR_SIGNALING_PATHWAY | KEGG_RIG_I_LIKE_RECEPTOR_SIGNALING_PATHWAY | 58 | 0.483293127687616 | 1.36172268746428 | 0.00817000606757034 | 0.0265699912193408 | 0.0170035230889322 | 6064 | tags=60%, list=38%, signal=37% | MAPK14/TBKBP1/TRIM25/MAPK10/AZI2/NLRX1/CHUK/IKBKG/NFKBIA/FADD/TANK/MAPK13/NFKB1/MAP3K1/TBK1/DDX3X/CASP8/TRAF6/MAVS/RIPK1/RELA/ATG12/OTUD5/MAP3K7/NFKBIB/ATG5/IRF7/IKBKB/CASP10/CYLD/IL12B/PIN1/SIKE1/TRADD/MAPK8 |
| KEGG_UBIQUITIN_MEDIATED_PROTEOLYSIS | KEGG_UBIQUITIN_MEDIATED_PROTEOLYSIS | KEGG_UBIQUITIN_MEDIATED_PROTEOLYSIS | 127 | 0.43260348439229 | 1.27636180027414 | 0.00889279591382428 | 0.0279487871577334 | 0.017885886518406 | 6529 | tags=61%, list=41%, signal=36% | NEDD4/SOCS3/UBE2J1/UBE2R2/UBE2H/UBE2D1/UBE2D3/UBE2B/MGRN1/CUL4B/UBA1/CBL/HERC3/CUL3/WWP2/HERC4/UBE2W/TRIP12/BRCA1/PIAS1/UBE4A/UBE2F/ITCH/UBE2A/MAP3K1/UBR5/UBA3/UBE2J2/UBA6/RCHY1/CDC26/FZR1/UBOX5/UBE4B/RNF7/SMURF1/UBE2G1/UBE2M/SMURF2/UBE2D2/TRAF6/FBXW11/BIRC2/UBE2K/UBE3B/MDM2/XIAP/PIAS4/UBE2L3/SKP1/KLHL9/CDC27/SIAH1/FBXW7/UBE2Q1/KEAP1/SYVN1/PIAS2/BIRC6/ANAPC7/VHL/UBE3C/PIAS3/UBE2Z/HERC1/HERC2/ANAPC11/CUL2/UBE2I/BTRC/HUWE1/ANAPC4/TRIM37/UBE2E1/UBE2E3/ANAPC2/UBE2N |
| KEGG_PENTOSE_PHOSPHATE_PATHWAY | KEGG_PENTOSE_PHOSPHATE_PATHWAY | KEGG_PENTOSE_PHOSPHATE_PATHWAY | 26 | 0.568470635606491 | 1.48567577562374 | 0.00972375427094069 | 0.0300242237137818 | 0.0192140666110924 | 3268 | tags=42%, list=21%, signal=34% | PGD/PGM1/G6PD/ALDOA/TALDO1/PGM2/H6PD/TKT/DERA/FBP1/PGLS |
| KEGG_OXIDATIVE_PHOSPHORYLATION | KEGG_OXIDATIVE_PHOSPHORYLATION | KEGG_OXIDATIVE_PHOSPHORYLATION | 108 | 0.433428027988162 | 1.2673538172365 | 0.00993898386945648 | 0.0301596751900748 | 0.0193007490749881 | 7537 | tags=73%, list=48%, signal=38% | ATP6V1C1/ATP6V0D1/COX6B2/NDUFB3/ATP6V0E1/ATP6AP1/ATP6V0B/SDHC/ATP6V0A1/ATP6V1E1/TCIRG1/COX7A2L/ATP6V1A/ATP6V1H/ATP6V1D/COX15/SDHB/NDUFA1/UQCRC1/ATP6V1B2/PPA2/COX8C/COX7A2/COX7B/UQCRFS1/COX17/COX8A/SDHD/NDUFS2/ATP6V1B1/NDUFB1/NDUFV2/COX5B/ATP4B/NDUFS1/NDUFB9/COX6A1/ATP6V0C/UQCRC2/COX6B1/ATP6V1F/ATP6V1G1/NDUFA7/UQCR10/NDUFC1/NDUFC2/NDUFB4/NDUFA2/NDUFB8/UQCR11/UQCRQ/COX4I1/CYC1/NDUFA4/ATP6V1G2/MT-CO3/NDUFS6/NDUFA10/ATP6V1C2/COX5A/NDUFB10/NDUFA8/NDUFB6/NDUFS5/MT-CO2/NDUFA9/SDHA/UQCRB/MT-CYB/MT-ND4L/MT-ND4/MT-CO1/NDUFA6/NDUFA5/MT-ND2/NDUFS3/MT-ATP6/MT-ND1/NDUFS4 |
| KEGG_O_GLYCAN_BIOSYNTHESIS | KEGG_O_GLYCAN_BIOSYNTHESIS | KEGG_O_GLYCAN_BIOSYNTHESIS | 27 | 0.545763898083517 | 1.43109218931596 | 0.0113732289914767 | 0.0339269203813541 | 0.0217116057464407 | 3118 | tags=44%, list=20%, signal=36% | B4GALT5/GALNT14/GALNT2/C1GALT1C1/ST3GAL2/GALNT1/GALNT3/C1GALT1/GALNT4/GALNT7/GALNTL6/GCNT1 |
| KEGG_PROTEIN_EXPORT | KEGG_PROTEIN_EXPORT | KEGG_PROTEIN_EXPORT | 22 | 0.571368050204433 | 1.4626555363722 | 0.0119902590813724 | 0.0351714266386924 | 0.0225080302053833 | 5329 | tags=68%, list=34%, signal=45% | HSPA5/SEC61A2/SEC62/SRP54/SRP14/SEC61B/SPCS3/SEC63/SRP19/SRP9/SEC61G/SEC61A1/SEC11A/SPCS2/SPCS1 |
| KEGG_LONG_TERM_DEPRESSION | KEGG_LONG_TERM_DEPRESSION | KEGG_LONG_TERM_DEPRESSION | 55 | 0.480709913653987 | 1.34822992180988 | 0.0126798586152063 | 0.0357705441122649 | 0.0228914367225619 | 4433 | tags=44%, list=28%, signal=31% | IGF1R/GNAQ/MAPK3/GNAI3/LYN/MAPK1/BRAF/KRAS/GNAI2/GNA13/PLA2G4A/PPP2CA/MAP2K1/RAF1/ARAF/PPP2CB/PRKCB/NRAS/MAP2K2/PRKCG/ITPR2/PLCB3/PPP2R1A/PLA2G12B |
| KEGG_ADIPOCYTOKINE_SIGNALING_PATHWAY | KEGG_ADIPOCYTOKINE_SIGNALING_PATHWAY | KEGG_ADIPOCYTOKINE_SIGNALING_PATHWAY | 61 | 0.47307588335231 | 1.33772048120899 | 0.0126544735128735 | 0.0357705441122649 | 0.0228914367225619 | 5087 | tags=52%, list=32%, signal=36% | ACSL1/IRS2/SOCS3/ACSL4/CAMKK1/ACSL3/MAPK10/CAMKK2/JAK2/CHUK/STAT3/IKBKG/NFKBIA/TNFRSF1A/RXRA/NFKB1/PRKAA1/PPARGC1A/PRKAB1/PRKAG1/CD36/RXRB/RELA/TNFRSF1B/CPT1A/AGRP/AKT2/NFKBIB/CPT1B/ADIPOR2/PCK1/IKBKB |
| KEGG_COLORECTAL_CANCER | KEGG_COLORECTAL_CANCER | KEGG_COLORECTAL_CANCER | 62 | 0.47031457646552 | 1.33164870899704 | 0.0128042288583675 | 0.0357705441122649 | 0.0228914367225619 | 4864 | tags=53%, list=31%, signal=37% | MAPK3/MAPK10/RHOA/PIK3CB/RAC2/PIK3CG/MAPK1/TGFBR1/BRAF/KRAS/PIK3CD/GSK3B/CTNNB1/RAC1/PIK3CA/MAP2K1/RAF1/CASP9/ARAF/APC/FOS/PIK3R5/SMAD2/TGFB1/SMAD4/TGFBR2/JUN/AKT2/MSH3/CASP3/BAD/MSH6/TCF7L2 |
